# Supplementary material for: System-Level Analysis of Alzheimer’s Disease Prioritizes Candidate Genes for Neurodegeneration
Source: Front Genet. 2021 Apr 6;12:625246. doi: 10.3389/fgene.2021.625246 (PMC8056044; doi:10.3389/fgene.2021.625246)
Supplement: Supplementary Data Sheet 7 — Final Amygdala Scores. [file Data_Sheet_7.CSV]

gene_name	entrez_id	av_p	mwas_amyg_fp	av_log_p	mwas_log_amyg_fp	comb_score_amyg
PRKCSH	5589	0.0011343	0.0029258241758241743	2.945272067917802	2.5337517758742996	0.9935233160621761
TOMM40	10452	2.6568e-11	0.006263736263736265	10.57564113740967	2.203166536648602	0.9916647893669746
PAK2	5062	9.4952e-4	0.0050824175824175834	3.0224958831669206	2.293929655246042	0.9908200045055192
SRGAP1	57522	0.0028899	0.003076923076923077	2.5391171849941725	2.5118833609788744	0.9904257715701734
UBE2J2	118424	3.884e-4	0.007706043956043954	3.410720778764033	2.113168518056876	0.9877787790042802
KAT5	10524	0.0043117	0.004587912087912084	2.3653514641657227	2.338384912501473	0.9862581662536607
EDF1	8721	0.0084997	0.0018131868131868129	2.0705964025967463	2.7415574481071876	0.9851881054291507
ENAH	55740	0.0069901	0.007403846153846158	2.155516611216044	2.1305426141262984	0.9785424645190358
ZNHIT1	10467	0.016282	0.0036813186813186762	1.7882922495933136	2.433996585284249	0.9731921603964857
APOE	348	6.9983e-11	0.016167582417582423	10.155007444312107	1.7913549164696023	0.9726852894796125
PFN1	5216	0.020883	0.001868131868131868	1.6802071115195492	2.7285924709428198	0.9712209957197567
BCAM	4059	0.016433	0.005480769230769233	1.7842831447504766	2.261158483626289	0.9703762108583014
NACC2	138151	0.016881	0.006909340659340661	1.7726018301263449	2.16056339425711	0.9674476233385898
HEXA	3073	0.0033487	0.016071428571428573	2.475123757858899	1.7939455175668755	0.9663775625140798
HDAC3	8841	0.020693	0.0068131868131868145	1.6841765422488442	2.1666497028228395	0.964181121874296
KLF16	83855	0.024144	0.005686813186813187	1.6171907775684855	2.245131038192138	0.9618157242622212
SLC25A11	8402	0.016808	0.010494505494505495	1.774483960602104	1.9790380207373472	0.9609146204100023
MKNK2	2872	0.037537	0.00114010989010989	1.4255404396397735	2.9430532869369634	0.9550574453705789
RNF111	54778	0.035754	0.003461538461538462	1.4466753641915695	2.460730838531493	0.9531989186753773
PHYKPL	85007	0.038105	0.002925824175824176	1.4190180340373226	2.5337517758742996	0.9518472628970489
PICALM	8301	0.031795	0.007953296703296706	1.4976411706803678	2.0994528155856007	0.9504392881279567
MOGS	7841	0.038527	0.003997252747252747	1.414234807082782	2.39823839032713	0.9499887362018473
GCN1	10985	0.022913	0.01343406593406593	1.6399180448940291	1.8717925245254359	0.9485244424419914
MAFG	4097	0.02647	0.011565934065934064	1.5772460586986519	1.9368192878133879	0.948073890515882
PTPN18	26469	0.0058497	0.02384615384615385	2.232866406000796	1.622581658472564	0.9475670195990088
DEDD2	162989	0.03098	0.010604395604395606	1.5089185865768129	1.974514078977301	0.946102725839153
SPPL2B	56928	0.023764	0.01506868131868132	1.6240804562953506	1.8219247517383261	0.9448637080423519
POLR2B	5431	0.0078251	0.024217032967032977	2.106510103727752	1.615879067013715	0.9448073890515882
CDC42EP1	11135	0.020618	0.01730769230769231	1.6857534647115782	1.7617608341954742	0.9440752421716603
PI4KB	5298	0.010912	0.022637362637362646	1.9620956426875964	1.64517417195194	0.9436246902455508
PLOD3	8985	0.021213	0.018021978021978025	1.6733979080363515	1.7441975442733957	0.9418788015318765
RELA	5970	0.041124	0.007912087912087909	1.3859046495225082	2.1017088958898253	0.9418788015318765
BLOC1S1	2647	0.0048536	0.027760989010989008	2.313936018064008	1.5565650657977332	0.9418224825411129
MINK1	50488	0.041625	0.008475274725274729	1.3806457534856238	2.071846215279795	0.940358188781257
EGLN2	112398	0.0023777	0.030054945054945065	2.623842942216746	1.5220840616516438	0.9400202748366749
MYL6B	140465	0.014085	0.02256868131868131	1.8512431486782077	1.6464938158779756	0.9399639558459112
INTS11	54973	0.054076	0.001964285714285713	1.2669954406273585	2.7067953418479758	0.939288127956747
NANS	54187	0.002012	0.03050824175824175	2.69637202361611	1.5155828207645634	0.9390628519936923
ZFPL1	7542	0.047351	0.006991758241758243	1.324670844751606	2.1554135969762784	0.9384996620860554
LY6E	4061	0.052267	0.0038186813186813196	1.2817724266448587	2.418086583394961	0.9381617481414734
TRAK1	22906	0.041837	0.009848901098901096	1.3784394649189236	2.006612223645237	0.9372606442892544
TRAPPC10	7109	0.013439	0.024615384615384626	1.8716330460619177	1.6087933739869307	0.937148006307727
EHBP1L1	254102	0.015238	0.0245879120879121	1.8170720307630075	1.6092783483331439	0.9354021175940527
CABIN1	23523	0.05214	0.006057692307692307	1.2828289731676898	2.2176927898451986	0.935345798603289
MGAT1	4245	0.052446	0.006524725274725275	1.2802876293802856	2.1854377696881704	0.9343883757603064
DHX37	57647	0.009747	0.028571428571428574	2.011129033935355	1.5440680443502757	0.9336562288803785
GON4L	54856	0.060293	0.0022664835164835154	1.2197331063978523	2.644647435099131	0.9335999098896148
DUSP23	54935	0.0011869	0.03428571428571429	2.9255858701588644	1.4648867983026508	0.9323045731020501
OGDH	4967	0.051831	0.008873626373626374	1.2854104120307688	2.051898861317953	0.9308965983329579
GTF3C1	2975	0.039808	0.014560439560439575	1.4000296413252942	1.8368255140482665	0.9299954944807389
SQSTM1	8878	0.062655	0.003777472527472529	1.2030442656791975	2.4227986854827743	0.9292070286100473
RDH5	5959	6.3801e-4	0.03612637362637363	3.1951725142086436	1.4421756308232794	0.9292070286100473
NDUFS1	4719	0.0082791	0.03156593406593406	2.082016871702791	1.500781354960771	0.9288127956747015
RAB4B	53916	0.02239	0.02457417582417583	1.6499459064209698	1.6095210387456642	0.9285312007208831
ZNF318	24149	0.055093	0.009052197802197801	1.2589035781808289	2.0432459647190275	0.9279116918224826
C1QTNF5	114902	0.031548	0.01993131868131868	1.5010281678460125	1.7004639668753014	0.9277427348501914
PGAP6	58986	0.030017	0.020947802197802196	1.5226327147759868	1.6788615356302325	0.9274048209056094
SDF4	51150	0.03168	0.021030219780219787	1.499214827082544	1.6771561886147761	0.9258278891642262
VPS51	738	0.035032	0.01902472527472528	1.455535067815931	1.7206816059125698	0.9256589321919351
GGN	199720	0.0049348	0.03548076923076924	2.306730443937908	1.4500069731397198	0.9246451903581888
PSD4	23550	0.0043232	0.03594780219780219	2.3641946726580634	1.4443276566731562	0.9244762333858977
MGAT4B	11282	0.007175	0.034162087912087906	2.14417809459397	1.4664555940431012	0.924419914395134
MFSD10	10227	0.04427	0.016414835164835165	1.353890478021152	1.7847634740288807	0.9235188105429151
AGPAT3	56894	0.055375	0.0114423076923077	1.256686260768874	1.9414863779062492	0.9229556206352783
SUOX	6821	0.030529	0.023076923076923064	1.5152874211056828	1.6368220975871746	0.9225613876999325
SLC35E1	79939	0.016295	0.030453296703296696	1.787945635198837	1.516365686198549	0.9224487497184051
PNPLA7	375775	0.060277	0.01	1.2198483707546781	2	0.9218292408200045
ZBTB34	403341	0.030961	0.023612637362637367	1.5091850206161395	1.6268555026259848	0.9212660509123677
ILVBL	10994	0.010981	0.034271978021978025	1.9593581084554634	1.4650608293536285	0.9196328001802208
CHD7	55636	0.06649	0.008420329670329673	1.1772436670486093	2.074670904794622	0.9192948862356387
CA12	771	0.06162	0.010920329670329673	1.2102783060190783	1.9617642506565667	0.9188443343095292
GBA2	57704	0.062359	0.011497252747252745	1.205100857850805	1.9394059213197772	0.9170421266050912
VIPAS39	63894	0.026343	0.028228021978021982	1.5793347681268832	1.5493195531009492	0.9165915746789818
ACAP3	116983	0.036345	0.02468406593406593	1.4395553268068124	1.6075833022040635	0.9146767289930164
NECTIN2	5819	1.9659e-6	0.04347527472527472	5.706438577324199	1.3617576649596634	0.91456409101148906
APOC1	341	4.6871e-13	0.0448489010989011	12.329095780641321	1.3482481937019444	0.9115228655102501
NDRG2	57447	0.063141	0.014313186813186817	1.199688544220127	1.8442636603495315	0.9106217616580311
LPAR1	1902	0.032414	0.028708791208791204	1.4892673722156669	1.5419850932019832	0.9104528046857401
TM7SF2	7108	0.026352	0.03115384615384615	1.579186418174321	1.5064883290921682	0.9104528046857401
EIF4G3	8672	0.05239	0.01965659340659341	1.2807516015520537	1.7064917455532607	0.9100022527596305
RASD1	51655	0.040632	0.02572802197802198	1.3911318001794588	1.5895936019377999	0.9087069159720658
TAPBPL	55080	0.016822	0.036469780219780215	1.7741223713604817	1.4380668538955494	0.9085942779905384
MED26	9441	0.041221	0.02582417582417582	1.3848814766709743	1.5879735300493574	0.9078621311106105
FERMT2	10979	0.077525	0.009931318681318685	1.110558225090636	2.0029930820185062	0.9072989412029736
SLC38A1	81539	0.070647	0.013351648351648353	1.1509062755862445	1.8744651143867626	0.9066794323045732
POLR2A	5430	0.012596	0.03956043956043955	1.8997673480354937	1.4027388915538064	0.9064541563415184
HNRNPAB	3182	0.022743	0.03506868131868133	1.6431522486407604	1.4550805645087868	0.9057783284523542
MEN1	4221	0.029762	0.03177197802197804	1.5263378876497256	1.4979557465424176	0.905609371480063
ZMIZ2	83637	0.085027	0.007541208791208787	1.0704431438263102	2.1225590348629457	0.9050461815724262
PTPN23	25930	0.08027	0.010453296703296703	1.0954467370232273	1.9807467225424644	0.904370353683262
SMIM29	221491	0.064636	0.017445054945054946	1.1895255277235561	1.7583276583570804	0.9040887587294436
ARHGEF2	9181	0.054361	0.022101648351648358	1.2647125627841471	1.6555753352140075	0.9040324397386799
ATP13A1	57130	0.065639	0.018063186813186815	1.1828380439777209	1.7432056264872604	0.9020612750619509
APP	351	0.074156	0.015109890109890113	1.1298537042246537	1.820738694154812	0.9011038522189683
CCND2	894	0.062602	0.020247252747252746	1.2034117917881504	1.6936338957900046	0.9005406623113313
CREB3	10488	0.097397	0.0032005494505494515	1.0114544199541469	2.4947754582870183	0.9003717053390403
MYL6	4637	0.020971	0.039120879120879117	1.678380859752725	1.4075913943482186	0.8998648344221671
ABCA3	21	0.026864	0.036167582417582424	1.5708293212060265	1.441680520206969	0.8993016445145303
DENND1A	57706	0.01826	0.04030219780219779	1.7384992268017199	1.3946712698057735	0.8990763685514755
FRS3	10817	0.014175	0.042335164835164835	1.8484769324350558	1.3732987449306366	0.8981189457084929
B3GALT6	126792	0.071735	0.017898351648351647	1.144268897357357	1.7471869636004524	0.8974431178193287
MFNG	4242	0.0097349	0.045357142857142874	2.011668505332573	1.3433543103862622	0.8965420139671098
SYDE1	85360	0.014164	0.04303571428571429	1.8488140819139265	1.3661709844313321	0.8963730569948186
TMEM147	10430	0.040994	0.0315934065934066	1.38727970322114	1.5004035432954441	0.896316738004055
TRAPPC3	27095	0.051221	0.027747252747252746	1.2905519469483688	1.5567800098664135	0.8962604190132912
KIF19	124602	0.058355	0.024780219780219777	1.2339219266044155	1.6058948461071143	0.8962041000225276
AMBRA1	55626	0.039076	0.032678571428571425	1.4080898990688573	1.485736937275771	0.8956972291056544
EPHB3	2049	0.02708	0.037884615384615385	1.5673513399868932	1.4215371174732063	0.895584591124127
NMT1	4836	0.089683	0.010714285714285716	1.0472898725177444	1.9700367766225566	0.895584591124127
KDM6B	23135	0.09139	0.010096153846153852	1.0391013226733392	1.995844040228842	0.8950777202072538
ARID5B	84159	0.059591	0.025068681318681316	1.224819326593372	1.6008685105205438	0.8948524442441992
PSMD4	5710	0.034295	0.03500000000000002	1.4647691928054942	1.455931955649724	0.8947961252534354
MR1	3140	4.7149e-5	0.05450549450549452	4.32652751393593	1.263559715830896	0.8942329353457986
INO80B	83444	0.062908	0.02344780219780219	1.20129412188495	1.6298978581983037	0.8942329353457986
PBX2	5089	0.055423	0.02734890109890109	1.2563099699254383	1.5630601192856277	0.8939513403919802
CD63	967	0.0011715	0.05362637362637362	2.9312577070670183	1.270621570318383	0.8935571074566344
ERCC1	2067	0.062785	0.02398351648351649	1.2021441014116596	1.6200871399434862	0.8935571074566344
PREB	10113	0.010915	0.0465934065934066	1.961976259954842	1.331675535728361	0.8932191935120523
PCYT2	5833	0.02647	0.039381868131868114	1.5772460586986519	1.404703686366553	0.8931065555305249
PRMT8	56341	0.016872	0.04368131868131867	1.77283343326857	1.3597042593286046	0.892543365622888
CAMLG	819	0.0086188	0.049175824175824175	2.0645531970125064	1.3082483526691628	0.8918675377337238
CPNE2	221184	0.064515	0.024409340659340657	1.1903392983902268	1.6124439515077358	0.8916985807614327
PML	5371	0.0054357	0.05173076923076923	2.264744520287567	1.2862510636323912	0.8911917098445595
CACNA1H	8912	0.075369	0.01997252747252748	1.122807246932841	1.699566972790018	0.8909664338815049
SCRIB	23513	0.09076	0.014217032967032962	1.0421055127871017	1.8471910295201008	0.8882068033340843
C1orf43	25912	0.063033	0.027074175824175824	1.2004320225199439	1.567444755033594	0.8880941653525569
PURB	5814	0.079885	0.020247252747252743	1.0975347604706904	1.6936338957900046	0.8869677855372832
SSNA1	8636	0.11134	0.005041208791208788	0.9533487830290804	2.2974653150609483	0.8865172336111737
ETFB	2109	0.019509	0.045879120879120876	1.709764991272439	1.3383849125014728	0.8860666816850642
STK25	10494	0.084648	0.018530219780219785	1.0723832986209043	1.7321194296411329	0.8859540437035368
REXO1	57455	0.066162	0.02723901098901099	1.1793913750420355	1.5648086651077344	0.8858414057220094
CEMIP2	23670	0.0090883	0.05240384615384615	2.0415173455641553	1.280636837022138	0.885728767740482
PIM3	415116	0.081146	0.020673076923076926	1.0907328833638494	1.6845948793831749	0.8851655778328452
CYTH1	9267	0.013341	0.05093406593406595	1.874811615831403	1.2929916538405777	0.8833070511376436
RASSF7	8045	0.037112	0.03976648351648352	1.4304856404892967	1.4004828112495822	0.8828001802207704
VEPH1	79674	0.004835	0.056359890109890114	2.3156035215809796	1.2490298623461245	0.8827438612300068
TLE5	166	0.082333	0.022403846153846146	1.0844260597408106	1.6496774182727616	0.8807726965532777
SH2B1	25970	0.10931	0.009793956043956043	0.9613401056975039	2.0090418494611715	0.8807163775625141
TMEM109	79073	0.090383	0.018791208791208786	1.0439132476272692	1.7260452819289398	0.8806037395809867
SLC6A9	6536	0.032026	0.04274725274725274	1.4944973006870548	1.369091790995386	0.8803221446271683
MAG	4099	0.074681	0.026813186813186812	1.1267898753564056	1.5716515659823642	0.879477359765713
DYNC1LI2	1783	0.11256	0.009491758241758243	0.9486159155733107	2.0226533319388387	0.8784636179319667
ZFPM2	23414	0.037593	0.04162087912087912	1.424893015295554	1.3806887508107322	0.8780130660058572
ADGRB2	576	0.0075569	0.0571978021978022	2.121656324736775	1.2426206584745387	0.8777877900428024
TMEM179B	374395	0.10625	0.013296703296703292	0.9736710612776509	1.8762560220046436	0.8777877900428024
DNAJC14	85406	0.023647	0.04864010989010989	1.6262239486296797	1.3130054525549262	0.8776188330705114
PRCP	5547	0.074556	0.028049450549450548	1.12751740033926	1.5520756415621457	0.8772246001351656
MAP3K11	4296	0.0019743	0.06096153846153846	2.7045868544803415	1.2149440814170476	0.8761545393106556
YWHAH	7533	0.010648	0.056950549450549455	1.9727319575333813	1.244502081555195	0.874633926560036
AKIP1	56672	0.028323	0.047417582417582434	1.5478607476474548	1.324060592269865	0.8743523316062176
DNAJC17	55192	3.3921e-4	0.06355769230769232	3.46953135311107	1.19683187981314	0.874296012615454
CIB2	10518	0.0084038	0.058420329670329674	2.0755242918122465	1.2334359965990138	0.8742396936246902
PARVB	29780	0.10648	0.015494505494505498	0.9727319575333813	1.8098222796657135	0.8739017796801082
GORASP1	64689	0.051255	0.03906593406593407	1.290263762145556	1.4082017872553085	0.8729443568371255
PCDH1	5097	0.12527	0.008049450549450549	0.9021529225766634	2.0942337632949464	0.871592701058797
MXRA8	54587	0.11564	0.012074175824175826	0.9368919170013797	1.9181425042392652	0.8711421491326875
TMEM127	55654	0.059192	0.036868131868131884	1.2277369856863733	1.4333488678160826	0.8708605541788691
TMEM65	157378	0.018534	0.05501373626373626	1.7320308413149057	1.2595288588927807	0.8708605541788691
SLC26A11	284129	0.019123	0.05526098901098901	1.718443974965633	1.2575813467417758	0.8700720883081775
USP8	9101	0.11414	0.013255494505494509	0.9425621317870606	1.8776040659692446	0.8697904933543591
DCTN3	11258	0.0096754	0.060439560439560426	2.014331071352793	1.2186787028268498	0.8687767515206127
KCNMA1	3778	0.1225	0.011002747252747256	0.9118639112994488	1.9584988632287994	0.868551475557558
PTTG1IP	754	0.05356	0.040329670329670324	1.2711594316600285	1.3943753280690043	0.8680446046406849
NCBP2	22916	0.048588	0.042348901098901104	1.3134709771839619	1.3731578545865288	0.8675940527145753
FAR2	55711	0.017239	0.05734890109890111	1.7634879303371724	1.2414748994934162	0.8671998197792296
ZNF282	8427	0.010041	0.060879120879120875	1.9982230329225605	1.215531627592664	0.8670308628069385
TMEM11	8834	0.058958000000000003	0.03927197802197803	1.2294572572334006	1.4059172239550481	0.8667492678531201
PLEKHM2	23207	0.11227	0.016936813186813185	0.9497362773542042	1.7711683027173055	0.8655665690470826
C1QTNF4	114900	0.02264	0.05594780219780221	1.6451235774837663	1.2522169692270393	0.865341293084028
LSM7	51690	0.11039	0.01853021978021978	0.9570702666568403	1.7321194296411329	0.8645528272133364
GALE	2582	0.047102	0.04468406593406591	1.3269606518833554	1.349847316031184	0.8638769993241721
CANX	821	0.061501	0.03962912087912088	1.211117822583102	1.401985561821287	0.8634827663888263
CRELD2	79174	0.091147	0.02810439560439561	1.040257621083464	1.5512257499368958	0.8633138094165352
CCNL2	81669	0.043505	0.046964285714285715	1.3614608270080797	1.3282322785164424	0.8629758954719532
ABHD17A	81926	0.10809	0.020659340659340667	0.966214483157769	1.6848835430574136	0.8628632574904258
PIP5K1A	8394	0.029906	0.05423076923076923	1.5242416710241253	1.265754235315438	0.8619058346474431
CRKL	1399	0.11074	0.019917582417582416	0.9556954808240854	1.7007633770780624	0.8614552827213336
GALK1	2584	0.060803	0.04092032967032968	1.2160749922518825	1.3880608760979936	0.8612300067582789
CPD	1362	0.0025729	0.06832417582417581	2.589577093032622	1.1654255983791202	0.8608920928136968
TNFRSF4	7293	0.012158	0.06273351648351651	1.9151378609515777	1.2025003677060364	0.8607794548321694
TUBB4B	10383	0.12634	0.013818681318681324	0.8984591274416508	1.8595333985931284	0.8607794548321694
ZC3H3	23144	0.066439	0.03972527472527473	1.1775769129116465	1.400933090690544	0.8595404370353683
GALC	2581	0.046837	0.0479532967032967	1.3294109301063124	1.3191815304988583	0.8592025230907863
HSP90AB1	3326	0.10308	0.025357142857142863	0.9868255901211328	1.5958996826231437	0.8585830141923857
FIS1	51024	0.14659	0.005673076923076924	0.8338956551583836	2.246181327656636	0.8573439963955846
PITPNM3	83394	0.0051932	0.06866758241758245	2.2845649515771353	1.1632482425604467	0.8572876774048209
OTUD4	54726	0.042544	0.05076923076923079	1.3711616800125082	1.294399416764968	0.8570060824510025
RPS3	6188	0.07094	0.03932692307692309	1.149108815864076	1.4053100312914384	0.856724487497184
TADA2B	93624	0.12886	0.015563186813186813	0.8898818729896725	1.80790146944964	0.8559923406172562
NELFB	25920	0.13663	0.011648351648351657	0.864453931664921	1.933735527056323	0.8558233836449651
HARBI1	283254	0.028722	0.057541208791208796	1.5417853221344078	1.2400210189518177	0.8557670646542014
NDST1	3340	0.0078145	0.06813186813186814	2.1070988044890346	1.1666497028228398	0.8553728317188556
TNFAIP1	7126	0.038409	0.05418956043956044	1.4155669997896638	1.266084371767598	0.8549222797927462
ZDHHC3	51304	0.028412	0.057980769230769245	1.5464981939999825	1.2367160271586288	0.8548659608019824
NOTCH1	4851	0.1233	0.018379120879120883	0.9090369234042683	1.7356752658812329	0.854753322820455
CELSR2	1952	0.083435	0.03546703296703298	1.0786517297190257	1.4501751413826356	0.8545280468574004
INPP5A	3632	0.033377	0.05615384615384616	1.4765527012696242	1.2506204921863808	0.8544717278666366
POLDIP2	26073	0.074108	0.03960164835164834	1.1301349071580653	1.4022867369248295	0.8541338139220546
MPPED1	758	0.093142	0.0317032967032967	1.0308544408757128	1.4988955748293435	0.8541338139220546
IQSEC1	9922	0.050826	0.049409340659340675	1.2939140678751768	1.3061909414945259	0.853514305023654
ZNF579	163033	0.05824	0.045728021978022	1.2347786336950193	1.3398175841563695	0.8530074341067808
GET4	51608	0.14985	0.007074175824175828	0.8243432527183364	2.150324150271846	0.852444244199144
SNX14	57231	0.068142	0.04266483516483516	1.1665851238321723	1.3699299279204975	0.8514305023653976
ENO1	2023	0.020134	0.0641346153846154	1.6960699357246314	1.1929075053822313	0.8512615453931065
DCTD	1635	0.053618	0.04927197802197804	1.270689389628842	1.3074000026370705	0.8509799504392881
TMEM42	131616	0.054444	0.04945054945054947	1.2640499746863585	1.3058288785457497	0.8500788465870691
DENND3	22898	0.13347	0.0165521978021978	0.8746163395322931	1.78114433240215	0.8500225275963055
PRMT2	3275	0.092371	0.034546703296703306	1.0344643547193384	1.461593389921091	0.8488961477810317
FAM214B	80256	0.10226	0.030782967032967037	0.9902942116094818	1.5116895227779759	0.8487835097995043
ENOX1	55068	0.048928	0.05315934065934068	1.3104425362677738	1.2744204142941256	0.8487271908087407
AHNAK2	113146	0.025362	0.06259615384615384	1.5958165017873376	1.2034523507305885	0.8484455958549223
IER2	9592	0.14103	0.014134615384615383	0.850688494092085	1.8497160045506043	0.8478824059472855
MORF4L1	10933	0.050114	0.05359890109890109	1.300040931350584	1.270844114254538	0.8468123451227754
PCNX3	399909	0.042311	0.05657967032967034	1.3735467102075922	1.2473395873566195	0.8464181121874296
RNF149	284996	0.047891	0.054807692307692286	1.3197460944681947	1.261158483626289	0.8461928362243749
ELF2	1998	0.0058904	0.07369505494505493	2.229855212531355	1.1325616530110674	0.845629646316738
ELK3	2004	0.16336	0.0029120879120879124	0.786854275257165	2.5357955183842855	0.8452354133813922
CYB561	1534	0.16055	0.005260989010989014	0.7943896900974787	2.2789326053444143	0.8452354133813922
DSE	29940	0.032586	0.06141483516483516	1.4869689468237288	1.2117267094450055	0.8447848614552828
HLA-DQB1	3119	0.028384	0.0631456043956044	1.5469264018483677	1.1996568755627275	0.8446159044829916
PTPMT1	114971	0.0041434	0.0751510989010989	2.3826431382905997	1.1240646645355679	0.8443343095291732
IL17RB	55540	0.010059	0.07258241758241758	1.9974451918515175	1.1391685703705476	0.8441653525568822
PTRH1	138428	0.15809	0.008118131868131866	0.8010956005432676	2.090543898431782	0.8437148006307726
AFTPH	54812	0.018911	0.06854395604395602	1.7232855053697085	1.1640308336896474	0.843489524667718
RANBP3	8498	0.15323	0.010906593406593406	0.8146561984178115	1.962310876885941	0.8427010587970264
LARP1	23367	0.12908	0.023021978021978026	0.8891410432681326	1.6378573650187793	0.8423068258616806
HES6	55502	0.027583	0.06482142857142857	1.5593585005753026	1.1882814019700878	0.8421941878801532
CEBPB	1051	0.11184	0.030412087912087903	0.9514028415983938	1.5169537627703333	0.8419689119170984
HPCAL1	3241	0.073406	0.0454945054945055	1.1342684406235142	1.3420410512001946	0.841856273935571
NCK1	4690	0.12683	0.024629120879120878	0.8967780075470759	1.6085510897508544	0.8417436359540437
POR	5447	0.099887	0.03541208791208789	1.0004910302489205	1.4508484662956531	0.8408988510925884
GANAB	23193	0.16107	0.008008241758241759	0.7929853413170997	2.096462824554023	0.8408988510925884
RPS6KA2	6196	0.15915	0.00958791208791209	0.798193357042978	2.018275956689876	0.8402230232034242
GRB10	2887	0.0067755	0.07596153846153848	2.1690586503829246	1.1194062480083389	0.839716152286551
TYRO3	7301	0.14374	0.017664835164835174	0.8424223594792709	1.7528904107248338	0.8396035143050237
PCYT1A	5130	0.059785	0.05365384615384616	1.2234077664194616	1.2703991403612016	0.8393782383419689
RXYLT1	10329	0.029339	0.06605769230769229	1.5325546928745744	1.18007660223923	0.8390403243973868
ATP13A2	23400	0.15621	0.011607142857142861	0.8062911676046453	1.9352746703633448	0.8387587294435683
KLHDC3	116138	0.13677	0.02197802197802199	0.8640091530783752	1.6580113966571122	0.8380265825636405
FDPS	2224	0.079049	0.045425824175824185	1.1021036196878617	1.3426971843993343	0.8375760306375309
TBC1D1	23216	0.16085	0.010425824175824178	0.7935789347620114	1.9818896034175568	0.8370691597206578
RNF167	26001	0.018391	0.0720467032967033	1.7353946556083373	1.1423858867834604	0.8370128407298941
RNASEH2C	84153	0.0031304	0.07901098901098903	2.504400165107376	1.102312501938211	0.8367875647668394
CNOT11	55571	0.031702	0.06633241758241759	1.4989133383638045	1.1782741739126907	0.8364496508222573
PLEKHG3	26030	0.011559	0.07509615384615388	1.9370797362673366	1.1243823054214799	0.8362806938499662
PIEZO1	9780	0.13976	0.021813186813186804	0.8546171080251255	1.66128088122196	0.8359990988961478
CAMSAP2	23271	0.14696	0.01869505494505494	0.8328008567022481	1.7282732541097026	0.8351543140346925
TRAPPC12	51112	0.1554	0.0142445054945055	0.8085489855351045	1.8463526229239962	0.8351543140346925
SLC9A1	6548	0.025974	0.06958791208791208	1.5854611638031997	1.157466193858508	0.8349853570624014
LTBP2	4053	0.038954	0.06384615384615386	1.4094479400778528	1.1948652599307628	0.8349290380716378
NRCAM	4897	0.018163	0.07302197802197803	1.740812417057195	1.1365464070423428	0.8348164000901104
TSPO	706	0.0919	0.04177197802197803	1.0366844886138888	1.379114959168905	0.8341405722009462
ATF4	468	0.14823	0.018695054945054943	0.8290638913909207	1.7282732541097026	0.8339152962378914
WBP1	23559	0.034636	0.06649725274725274	1.4604722690286602	1.1771962966721476	0.8332957873394908
GNPNAT1	64841	0.02697	0.0700686813186813	1.5691190535471087	1.1544760557818503	0.8332957873394908
HGS	9146	0.16925	0.007623626373626377	0.771471322642818	2.117838396190361	0.8331268303671998
PACSIN2	11252	0.15553	0.015892857142857143	0.8081858280016584	1.7987980203612877	0.832732597431854
TIGAR	57103	0.052776000000000003	0.05950549450549451	1.2775635289276035	1.2254429313597544	0.8326762784410904
PHPT1	29085	0.024211	0.07188186813186813	1.615987272288427	1.1433806445733719	0.8324510024780356
ATP8B3	148229	0.077552	0.049546703296703305	1.110406997621316	1.304985236994674	0.8323946834872719
TMEM199	147007	0.16118	0.013516483516483513	0.7926888485638658	1.8691362808816958	0.8316062176165803
ABTB2	25841	0.14907	0.0203021978021978	0.8266097485348047	1.6924569452542304	0.8307051137643613
ACTR8	93973	0.0093158	0.07879120879120882	2.0307798438630713	1.1035222366532933	0.8304798378013066
LDLRAP1	26119	0.012829	0.07751373626373625	1.891807194864958	1.1106213290429958	0.8298040099121424
DDX56	54606	0.15991	0.015782967032967027	0.7961243767226659	1.8018113506247522	0.8293534579860329
FAM53C	51307	0.11314	0.03605769230769231	0.9463838255956095	1.4430020715710614	0.8291281820229781
RAP1GAP	5909	0.016193	0.07695054945054945	1.7906726841219351	1.1137882748254877	0.8281707591799955
SENP2	59343	0.11043	0.03787087912087913	0.9569129278336709	1.4216946132072634	0.8281144401892319
MRPL49	740	0.090814	0.045659340659340665	1.041847194936372	1.3404703642009637	0.8274949312908313
BCAP29	55973	0.13188	0.03048076923076924	0.8798210615288846	1.5159740770810288	0.8269317413831944
VCL	7414	0.022665	0.0751098901098901	1.6446442766052933	1.1243028734172527	0.8263685514755575
RBPJ	3516	0.080905	0.05210164835164834	1.0920246377782261	1.2831485366102466	0.8258616805586844
CNR1	1268	0.062317	0.059780219780219815	1.2053934621841158	1.2234424926229135	0.8252421716602838
MRPL12	6182	0.17183	0.011456043956043958	0.7649010099050605	1.9409653286752984	0.8249042577157017
ICOSLG	23308	0.18398	0.005906593406593406	0.7352293854781347	2.2286629237334505	0.8240594728542464
ZBED3	84327	0.047262	0.06648351648351648	1.32548790414704	1.1772860176686246	0.8240031538634828
CERS6	253782	0.04288	0.06817307692307692	1.3677452233152865	1.166387104115714	0.8237215589096644
KCNK6	9424	0.10139	0.04320054945054946	0.9940048769453087	1.3645107295317493	0.8236652399189006
PALM	5064	0.0047674	0.08439560439560441	2.321718407857976	1.0736801722895815	0.8229894120297364
PIK3CD	5293	0.031495	0.07325549450549451	1.5017583873141085	1.1351597956301605	0.822707817075918
EREG	2069	0.027506	0.07450549450549449	1.5605725613454726	1.1278116984540303	0.8226514980851544
SCAMP3	10067	0.14711	0.026112637362637366	0.832357804517834	1.583149262447594	0.8222572651498086
XPO1	7514	0.007095	0.08347527472527472	2.149047600206507	1.078442142965721	0.82197567019599
XPO7	23039	0.097261	0.04590659340659343	1.0120612694969255	1.3381249337556644	0.8219193512052264
TTC9C	283237	0.14738	0.02637362637362637	0.8315614478132275	1.5788301506094877	0.821637756251408
CARS2	79587	0.16441	0.018282967032967033	0.7840717706600822	1.737953323838362	0.8206240144176616
MKNK1	8569	0.13562	0.031991758241758234	0.8676762599590092	1.4949618907783566	0.8202861004730795
ENTPD4	9583	0.12793	0.035480769230769225	0.8930276001133266	1.45000697313972	0.819666591574679
SYT17	51760	0.025997	0.0765659340659341	1.585076765822176	1.1159644149357517	0.819666591574679
MAPKAPK3	7867	0.16045	0.0215934065934066	0.7946602785684771	1.6656788376096479	0.8193849966208605
UTS2R	2837	0.053008	0.06688186813186812	1.2756585814621153	1.174691604767143	0.8185402117594053
KRIT1	889	0.0083536	0.08483516483516483	2.07812632413336	1.0714240919853575	0.8178080648794773
TUBB2B	347733	0.014853	0.0818956043956044	1.8281858189488536	1.0867394076164252	0.8175827889164227
LEMD3	23592	0.063963	0.06298076923076924	1.1940711751182476	1.2007920393069973	0.8174701509348953
TRAF1	7185	0.066974	0.06219780219780221	1.1740937621949181	1.2062249611328222	0.8168506420364947
TTC5	91875	0.10733	0.04457417582417583	0.969278870639538	1.350916678176649	0.8166253660734399
HOXA11	3207	0.067421	0.062115384615384614	1.1712048102359736	1.2068008213036963	0.8165690470826763
TKT	7086	0.19129	0.007266483516483517	0.7183077328390626	2.1386757072778515	0.8163437711196215
TMTC4	84899	0.15536	0.02559065934065935	0.8086607874360704	1.5919185244167944	0.8163437711196215
ARL2	402	0.1232	0.03929945054945053	0.9093892921715934	1.4056135215077747	0.8158369002027483
FXR2	9513	0.19283	0.006991758241758243	0.71482539874798	2.1554135969762784	0.8156679432304573
ARHGEF40	55701	0.069173	0.0631868131868132	1.1600633887684408	1.199373547631463	0.813922054516783
SCARB2	950	0.058667	0.06741758241758242	1.2316061193302392	1.1712268252580706	0.813584140572201
ZYX	7791	0.1674	0.021071428571428574	0.7762445463427589	1.676306019700075	0.8131335886460914
MOCOS	55034	0.16583	0.022170329670329666	0.7803368992629781	1.6542278489269857	0.8130772696553278
ELP2	55250	5.5974e-4	0.0918818681318681	3.252013656540559	1.036770183360404	0.8126267177292182
EEF2K	29904	0.070383	0.06339285714285715	1.152532225769109	1.1979596739511063	0.8123451227753998
SPTBN5	51332	0.03261	0.07802197802197804	1.486649201194043	1.1077830436020182	0.8113876999324172
GRN	2896	0.18587	0.013145604395604405	0.7307907010610647	1.8812194415361934	0.8112750619508898
OXT	5020	0.037271	0.07638736263736266	1.4286289547466788	1.1169784842361368	0.8112187429601262
BCL2L11	10018	0.16484	0.023804945054945053	0.7829373941474493	1.6233328165991203	0.8111624239693624
TPR	7175	0.050258	0.07208791208791208	1.2987947980006291	1.1421375529454334	0.8110497859878351
SGSH	6448	0.18817	0.012980769230769235	0.7254496150904697	1.8866995708037742	0.8099234061725614
QDPR	5860	0.032386	0.07872252747252746	1.489642688457954	1.1039009708552878	0.809810768191034
MCM3AP	8888	0.16901	0.022335164835164845	0.7720875982482519	1.6510108380549877	0.8094728542464519
STRIP1	85369	0.054082	0.07151098901098905	1.2669472561769417	1.14562721553982	0.8094165352556882
PDE1B	5153	0.041906	0.07549450549450548	1.3777237913454277	1.1220846552615433	0.8093602162649245
PSMB4	5692	0.12719	0.04094780219780222	0.8955470326777089	1.3877694032804062	0.8093038972741609
GALNT10	55568	0.16727	0.023447802197802205	0.7765819430947057	1.6298978581983035	0.8091349403018698
STX3	6809	0.016788	0.08516483516483515	1.7750010394605475	1.0697396898147833	0.8089096643388151
MPPE1	65258	0.039597	0.07667582417582418	1.4023377164179183	1.1153415471604249	0.8087970263572877
OGFRL1	79627	0.010071	0.08862637362637363	1.996927404032325	1.0524370205961133	0.8083464744311782
EPS15L1	58513	0.15292	0.030934065934065936	0.8155357106530094	1.5095629931337284	0.8081211984681235
TMEM87B	84910	0.20218	0.006387362637362639	0.6942618077916825	2.194678426423083	0.8079522414958324
ARL1	400	4.7412e-4	0.09456043956043955	3.324111724270929	1.0242905176575146	0.8077269655327777
GSS	2937	0.070421	0.06622252747252748	1.1522978121059606	1.1789942478300302	0.8072764136066681
CPT1A	1374	0.14767	0.03358516483516484	0.830707725120064	1.4738525158533982	0.8072200946159045
MAP1S	55201	0.20038	0.008228021978021978	0.6981456277304133	2.0847045569237257	0.8069948186528497
NADK	65220	0.20698	0.0035851648351648354	0.6840716173898131	2.4454908719747563	0.8068821806713223
CEP250	11190	0.059529	0.07074175824175824	1.2252714128980977	1.1503241502718462	0.8068258616805587
ZFP36L2	678	0.18847	0.015123626373626367	0.7247577694441002	1.8203440603412857	0.8064879477359765
PARP9	83666	0.10037	0.05401098901098901	0.9983960758502022	1.2675178701529393	0.8064316287452129
EWSR1	2130	0.16486	0.027060439560439558	0.7828847044923161	1.5676651531514443	0.8062626717729219
CFLAR	8837	0.16411	0.027527472527472525	0.7848649545197389	1.5602336621178292	0.8059810768191034
UNC93B1	81622	0.13865	0.03836538461538461	0.8580801260861196	1.4160604436120323	0.805699481865285
PLPPR2	64748	0.15113	0.03304945054945052	0.8206493176515124	1.4808357563092116	0.805699481865285
ONECUT2	9480	0.038251	0.07853021978021979	1.4173572065546787	1.1049631870987646	0.8055868438837576
ORMDL2	29095	0.010915	0.0895054945054945	1.961976259954842	1.0481503036765654	0.8055305248929939
PTPN11	5781	0.11021	0.05024725274725277	0.9577789976096182	1.2988876781726388	0.8053052489299392
LRRC56	115399	0.052298	0.07384615384615385	1.2815149192698587	1.1316721192672683	0.8049110159945934
RNF24	11237	0.062494	0.07061813186813187	1.2041616769275445	1.1510837754460033	0.8049110159945934
SIRT7	51547	0.02647	0.08285714285714285	1.5772460586986519	1.0816700464513196	0.8047420590223023
SMARCC2	6601	0.10699	0.05292582417582419	0.9706568124808934	1.2763323703000362	0.8041225501239018
IGFBP7	3490	0.13841	0.03942307692307692	0.8588325313537676	1.4042494825790448	0.8036719981977923
MIEF1	54471	0.086843	0.06104395604395606	1.0612651822127657	1.2143573290442071	0.8036719981977923
HEY1	23462	0.098208	0.05619505494505496	1.0078531332482714	1.2503018998146633	0.8036156792070286
DEDD	9191	0.20082	0.010027472527472533	0.6971930372585793	1.998808519192581	0.8033340842532102
MYPOP	339344	0.0049987	0.09399725274725274	2.301142926910974	1.0268848393167263	0.802996170308628
HAX1	10456	0.14284	0.03844780219780219	0.8451501584792557	1.415128480846875	0.802489299391755
HMGXB3	22993	0.19595	0.013804945054945054	0.7078547321858786	1.8599653175565296	0.8018697904933544
ACSBG1	23205	0.01524	0.08942307692307692	1.8170150329964183	1.0485503907448452	0.801757152511827
BRD1	23774	0.1386	0.04043956043956045	0.858236769724212	1.3931935736475758	0.8013629195764812
CHST6	4166	0.039253	0.08076923076923075	1.4061271457045497	1.092754053236899	0.8004054967334986
NQO2	4835	0.092777	0.06064560439560439	1.0325596747630474	1.2172006713994499	0.8001802207704438
FAM241B	219738	0.0095694	0.09289835164835165	2.019115291570913	1.0319919918876945	0.8001802207704438
CRY1	1407	0.07994	0.06626373626373626	1.097235856075914	1.1787240801809424	0.8001802207704438
ADRB3	155	0.062957	0.07282967032967032	1.200955974970584	1.1376916559159627	0.8001239017796801
RELB	5971	0.11646	0.050576923076923075	0.9338232142279935	1.2960475951450412	0.7995043928812796
MSRB1	51734	0.077094	0.06796703296703298	1.1129794205001247	1.1677016883559541	0.7989975219644064
PILRA	29992	0.1874	0.02016483516483517	0.7272304134482405	1.6954053237329854	0.7988285649921153
BICDL1	92558	0.14905	0.03767857142857143	0.8266680196313505	1.4239055717085078	0.798715927010588
TNKS1BP1	85456	0.21511	0.004285714285714286	0.667339399729365	2.3679767852945943	0.7985469700382969
PAPSS1	9061	0.1122	0.053777472527472524	0.9500071430798575	1.269399612919075	0.7979274611398963
FCMR	9214	0.080697	0.06736263736263737	1.0931426103543047	1.1715809178026786	0.7977585041676053
MRPL53	116540	0.11721	0.05186813186813186	0.9310353340555532	1.2850993936870059	0.7968010813246227
FNBP4	23360	0.022515	0.08888736263736265	1.6475280487010484	1.0511599794908297	0.7964068483892769
STX10	8677	0.21335	0.007431318681318681	0.6709073528046691	2.128934114206468	0.7962378914169858
PXN	5829	0.058152	0.07629120879120879	1.2354353441508878	1.1175255038987983	0.7961815724262221
PPP1R13L	10848	0.17331	0.02828296703296705	0.7611763777389249	1.5484750326950056	0.7959562964631673
SARS1	6301	0.16786	0.030714285714285708	0.7750527812229133	1.5126595800986515	0.7957873394908763
ZBTB4	57659	0.014993	0.09240384615384614	1.8241114590071015	1.034309951630235	0.7957873394908763
TNFSF9	8744	0.10443	0.058502747252747254	0.9811747219960492	1.2328237392392882	0.7952804685740031
H6PD	9563	0.10653	0.057967032967032955	0.9725280729787221	1.2368189283513633	0.7948862356386573
MSRB3	253827	0.050102	0.07989010989010992	1.300144937373729	1.0975069814620557	0.7947172786663663
ATXN1	6310	0.083853	0.06758241758241759	1.0764813950717431	1.1701662765456768	0.7944356837125479
ARHGAP1	392	0.11445	0.054684065934065954	0.9413842029894383	1.262139201728939	0.7942104077494931
JKAMP	51528	0.098604	0.060851648351648344	1.0061054669787515	1.2157276530899677	0.7941540887587294
DNASE1L2	1775	0.19018	0.02174450549450549	0.7208351569377293	1.6626504644506814	0.7941540887587294
ROCK2	9475	0.077311	0.07067307692307694	1.1117587091938859	1.1507460002145853	0.7940977697679658
GRIN1	2902	0.13782	0.04431318681318681	0.8606877544213303	1.3534670162600946	0.7939851317864384
SMARCE1	6605	0.062443	0.07596153846153848	1.204516239944222	1.1194062480083389	0.79370353683262
RABEP2	79874	0.20011	0.01759615384615385	0.6987312080339371	1.7545822495683507	0.7918450101374184
NEK6	10783	0.0083627	0.0978846153846154	2.0776534826342576	1.0092855612980403	0.790831268303672
GRB2	2885	0.18088	0.028076923076923072	0.7426094506626967	1.551650487850362	0.790831268303672
SLC36A1	206358	0.036141	0.0859478021978022	1.4419998349385206	1.065765224335516	0.790662311331381
CLIC6	54102	0.013982	0.09549450549450551	1.854430702207011	1.0200216158724271	0.790662311331381
PIK3CB	5291	0.0033104	0.10023351648351646	2.4801195266783407	0.9989870330603698	0.7905496733498536
USP42	84132	0.21061	0.012554945054945055	0.6765210118698417	1.9011851835792057	0.7905496733498536
ZNF408	79797	0.10799	0.05942307692307693	0.9666164588268809	1.2260448642099644	0.7904370353683262
PGP	283871	0.060812	0.07806318681318683	1.2160107131688045	1.1075537232683068	0.7903807163775625
RNF40	9810	0.22229	0.005686813186813189	0.6530800741543789	2.245131038192138	0.7903807163775625
IDI1	3422	0.18213	0.028104395604395614	0.7396185124073886	1.5512257499368958	0.7902680783960352
PEF1	553115	0.16067	0.03685439560439561	0.7940652063153183	1.4335107066410981	0.7902117594052714
GPR155	151556	0.12486	0.05325549450549451	0.9035766694047295	1.273635578305827	0.790099121423744
GABARAPL1	23710	0.18834	0.025343406593406594	0.7250574339163139	1.596135008817958	0.7899864834422167
UTP20	27340	0.0010982	0.10217032967032971	2.959318560626642	0.9906752052900832	0.7899864834422167
ARAP3	64411	0.033293	0.08793956043956043	1.4776470692247334	1.0558157095049236	0.7892543365622888
TSC22D4	81628	0.20471	0.017032967032967035	0.688860941711008	1.768709694150802	0.7889727416084704
HRAS	3265	0.15913	0.03864010989010988	0.7982479372217484	1.4129616471478363	0.7887474656454156
ANPEP	290	0.067226	0.07706043956043958	1.1724627288405958	1.1131685180568758	0.7884095517008335
DGKA	1606	0.024763	0.09200549450549451	1.6061967423449186	1.0361862361091891	0.7878463617931967
TAF6L	10629	0.1627	0.03752747252747253	0.7886124470631412	1.4256506843035421	0.7877337238116693
SIMC1	375484	0.12639	0.05423076923076921	0.8982872861534897	1.2657542353154383	0.7875647668393783
KCNT1	57582	0.024502	0.09240384615384614	1.6107984644716664	1.034309951630235	0.7874521288578509
LETM1	3954	0.13135	0.051991758241758224	0.8815699228779109	1.2840654954769457	0.7869452579409777
RRM2B	50484	0.1593	0.03934065934065934	0.7977842241988685	1.4051583656772193	0.7868889389502141
SMC5	23137	0.17202	0.03346153846153845	0.7644210566698718	1.4754540953521995	0.7867763009686867
TNFAIP2	7127	0.19207	0.025315934065934072	0.7165404636230063	1.5966060440939633	0.7867763009686867
EFR3B	22979	0.021078	0.09475274725274727	1.6761705998243308	1.023408189281665	0.7864383870241045
LRP12	29967	0.1692	0.03486263736263736	0.7715996412969953	1.4576397615543513	0.7863257490425771
ALG12	79087	0.13475	0.05057692307692307	0.8704712261412236	1.2960475951450414	0.7863257490425771
EFHD2	79180	0.011073	0.09879120879120877	1.9557347000846803	1.005281700587865	0.7858751971164677
FSD1L	83856	0.0011618	0.10456043956043959	2.93486862785979	0.9806325996980543	0.7855936021626493
CRABP1	1381	0.16758	0.03605769230769231	0.7757778139153513	1.4430020715710614	0.7854809641811219
HSF1	3297	0.19352	0.0256868131868132	0.7132741446461768	1.590289772776538	0.7851430502365397
MAP4K3	8491	0.039801	0.08763736263736262	1.4001060161417385	1.057310700591875	0.784917774273485
TBX3	6926	0.13039	0.054368131868131886	0.884755714672745	1.2646555894426597	0.7845235413381392
HLA-DQA1	3117	0.037424	0.08877747252747252	1.4268497955349222	1.0516972233903645	0.7842419463843208
ANKRD13D	338692	0.18475	0.03023351648351648	0.7334155529331366	1.5195113367596893	0.7841856273935571
MAN2A1	4124	0.20718	0.018846153846153853	0.6836521712669021	1.7247772679423041	0.7837350754674476
SMYD3	64754	0.017562	0.09684065934065932	1.7554260271825644	1.0139422623216385	0.783678756476684
LTBR	4055	0.21212	0.016304945054945057	0.6734183815534749	1.7876806603584459	0.7833971615228655
TET3	200424	0.096169	0.06864010989010991	1.0169648998813168	1.1634220298704503	0.7824960576706466
STAT3	6774	0.22984	0.007431318681318683	0.638574387016109	2.1289341142064675	0.7823834196891192
CMTR1	23070	0.05763	0.0825686813186813	1.239351380418644	1.0831846513444205	0.782045505744537
RABAC1	10567	0.045263	0.0873351648351648	1.3442566646926546	1.0588108557342832	0.7819328677630096
AGO4	192670	0.0090275	0.10167582417582416	2.044432502901136	0.9927822985539443	0.781876548772246
POMC	5443	0.012539	0.0999725274725275	1.9017370976200705	1.0001193280628204	0.7817639107907186
HECTD1	25831	0.21839	0.014107142857142853	0.6607672517010388	1.850560935715759	0.781707591799955
PLEKHH2	130271	0.0077215	0.10287087912087908	2.112298324218238	0.9877075487265354	0.7813133588646092
MAP3K12	7786	0.22332	0.011401098901098895	0.6510723808216082	1.9430532869369634	0.7813133588646092
EPOR	2057	0.19171	0.029313186813186804	0.7173552328102606	1.5329369642245863	0.7802996170308628
LYPLA2	11313	0.22903	0.009340659340659342	0.640107626912887	2.029622466606801	0.7802432980400992
PRELID3A	10650	0.064906	0.08130494505494507	1.187715154564078	1.0898830393411836	0.7801306600585718
COL8A2	1296	0.060446	0.08273351648351648	1.2186324331887348	1.0823185161424567	0.7799617030862807
ITGB2	3689	0.2025	0.023859890109890116	0.6935749724493127	1.6223315608659385	0.779905384095517
GAS2L1	10634	0.19485	0.028173076923076922	0.7102995898712909	1.550165718944671	0.779905384095517
CSNK1E	1454	0.17831	0.03483516483516485	0.7488242999932601	1.457982130103342	0.7793985131786438
POMT2	29954	0.046736	0.08824175824175823	1.3303484603705256	1.0543258470424128	0.7792858751971165
ARHGAP44	9912	0.16504	0.04071428571428572	0.7824107850349049	1.3902531800057465	0.7791732372155891
C19orf73	55150	0.080125	0.0772252747252747	1.096231957473126	1.1122405380416154	0.7788916422617707
NSMF	26012	0.037109	0.09179945054945059	1.4305207487052038	1.0371599181893436	0.7786100473079522
RASGEF1A	221002	0.19805	0.02754120879120879	0.7032251532596883	1.560017002356836	0.7785537283171886
CHRNA7	1139	0.083207	0.07611263736263738	1.079840136047097	1.1185432291531332	0.7782158143726065
MB21D2	151963	0.065253	0.08217032967032965	1.1853995168863054	1.0852849706177379	0.7779905384095517
REX1BD	55049	0.1423	0.0524587912087912	0.8467950999157157	1.2801817209397195	0.7777652624464969
EGR1	1958	0.13941	0.0540934065934066	0.8557060728014692	1.2668556675109377	0.7776526244649696
ENO3	2027	0.20215	0.025535714285714287	0.6943262543303069	1.5928519895411386	0.7776526244649696
GP1BA	2811	0.0048285	0.10624999999999998	2.3161877642587054	0.9736710612776509	0.7775963054742059
MRPL17	63875	0.063692	0.08295329670329672	1.1959151135679997	1.0811663497047201	0.7770894345573327
HSDL1	83693	0.019563	0.09960164835164838	1.708564545072878	1.0017334741857242	0.7769204775850417
CCNDBP1	23582	0.09374	0.07287087912087913	1.0280750508158085	1.1374459910756778	0.776864158594278
PROP1	5626	0.10495	0.06924450549450548	0.9790175570815808	1.1596146818748867	0.7758504167605317
ORAI1	84876	0.1288	0.05932692307692309	0.8900841369762067	1.2267481752655385	0.7757940977697679
FBXW5	54461	0.23991	0.005769230769230771	0.6199516492630747	2.2388820889151364	0.7757377787790043
RPP25L	138716	0.010881	0.10425824175824175	1.9633311896999033	0.9818896034175568	0.7753435458436585
ZNRF4	148066	0.051189	0.0884065934065934	1.2908233545037484	1.0535153438860452	0.7752872268528948
NXPH3	11248	0.20236	0.027321428571428573	0.6938753292634702	1.5634965961886016	0.7751745888713675
CALM3	808	0.24371	0.003447802197802198	0.6131266503158208	2.462457657831999	0.7749493129083127
ERP29	10961	0.19749	0.030082417582417587	0.7044548901882588	1.5216872644729187	0.7745550799729669
NRIP1	8204	0.23829	0.008324175824175826	0.6228941827309465	2.0796587551467507	0.7745550799729669
FBXW4	6468	0.12038	0.06336538461538462	0.9194456610112289	1.1981479247047706	0.7744987609822032
MLST8	64223	0.10682	0.06924450549450549	0.9713474263668815	1.1596146818748867	0.7744424419914395
PSAP	5660	0.12641	0.06086538461538463	0.8982185686720326	1.2156296292814253	0.7743298040099121
COL9A3	1299	0.21154	0.02237637362637363	0.6746074999827366	1.6502102950045276	0.7739355710745663
FTH1	2495	0.085525	0.07745879120879123	1.0679069171428999	1.1109292847246839	0.7738792520838027
CAVIN2	8436	0.046715	0.0912637362637363	1.330543646816331	1.0397017555336803	0.7734850191484569
TEAD3	7005	0.18061	0.03712912087912087	0.743258207374745	1.430285333614312	0.7734850191484569
AURKAIP1	54998	0.12076	0.0638186813186813	0.9180768956489399	1.1950521738488207	0.7733160621761658
TSTD1	100131187	0.16157	0.044986263736263736	0.7916392750216209	1.3469200749852352	0.7731471052038748
TSPOAP1	9256	0.078787	0.08054945054945056	1.1035454359879213	1.0939374176799657	0.7728091912592926
ATP6V0D1	9114	0.22064	0.018324175824175816	0.6563157511682255	1.7369755497325072	0.7725839152962379
GFPT1	2673	0.18013	0.03803571428571428	0.7444139509814426	1.4198084235674628	0.7725275963054742
WNT4	54361	0.028058	0.09803571428571425	1.5519432891137879	1.0086156825561086	0.7722460013516558
ECHDC2	55268	0.061258	0.08629120879120879	1.2128371864903154	1.0640334472505513	0.7721333633701284
ZFAND5	7763	0.24811	0.003324175824175826	0.605355731264682	2.4783160133326056	0.7719080874070736
CDH1	999	0.12572	0.062403846153846164	0.9005956276544577	1.2047886424984111	0.7719080874070736
GSTK1	373156	0.02207	0.10104395604395602	1.656197666838345	0.9954896587469974	0.77185176841631
NPTX1	4884	0.1076	0.07028846153846152	0.9681877286696297	1.15311596234092	0.7717954494255463
LIN7B	64130	0.041638	0.09365384615384613	1.3805101391476675	1.028474382420165	0.7717954494255463
COL4A4	1286	0.060212	0.08714285714285713	1.2203169470406823	1.0597682050034898	0.7713448974994368
RNPS1	10921	0.010871	0.10625000000000001	1.9637305042571847	0.9736710612776508	0.7713448974994368
PSMC6	5706	0.16316	0.045288461538461555	0.787386303354943	1.344012432169884	0.7712885785086732
CCDC50	152137	0.19523	0.032513736263736256	0.7094534457196934	1.4879331213839546	0.7707817075918
FDFT1	2222	0.042614	0.09423076923076923	1.3704476984586829	1.0258072636062856	0.770218517684163
FAM160A2	84067	0.22767	0.016387362637362637	0.6426941924539041	1.7854909356426953	0.7701621986933994
C19orf25	148223	0.11283	0.06876373626373627	0.9475754118579385	1.1626405340408328	0.76971164676729
INTS5	80789	0.23027	0.015837912087912093	0.6377626390359015	1.800302072018338	0.7693737328227078
FKRP	79147	0.22244	0.019340659340659344	0.6527871135951373	1.7135287245069437	0.7693174138319442
GDF15	9518	0.20977	0.026799450549450547	0.6782566217957693	1.5718741099185192	0.7690921378688894
SLC35B2	347734	0.1916	0.034972527472527465	0.7176044952574744	1.4562729799954006	0.7690358188781257
EIF2S1	1965	0.11365	0.06895604395604397	0.9444305599390104	1.1614276621680177	0.768810542915071
GHITM	27069	0.058542	0.08906593406593409	1.232532444626405	1.0502883731365598	0.7686979049335436
ATXN7	6314	0.080915	0.08155219780219783	1.0919709615351836	1.0885643303869783	0.7684726289704888
SHMT1	6470	0.082246	0.08108516483516484	1.0848852145958652	1.0910585960918424	0.7683599909889615
DHRS7B	25979	0.064378	0.0871978021978022	1.1912625194561786	1.0594944612302266	0.7683599909889615
HMGCL	3155	0.010779	0.10770604395604394	1.9674215280756882	0.9677599254567996	0.7681910340166704
RERE	473	0.020973	0.10369505494505496	1.6783394431513297	0.9842419539415531	0.7679657580536157
GPSM3	63940	0.15376	0.05306318681318682	0.8131566296755298	1.2752066711682168	0.7674588871367425
LRRC20	55222	0.061371	0.08895604395604395	1.2120368001160418	1.050824539231701	0.7671772921829241
BCKDK	10295	0.24152	0.011140109890109894	0.6170468999849587	1.953110525101881	0.7666141022752873
GIGYF1	64599	0.20306	0.03167582417582418	0.6923756181518818	1.499272076354357	0.7658256364045957
SFXN3	81855	0.16085	0.050508241758241756	0.7935789347620114	1.2966377494441748	0.7656566794323045
TMEM59L	25789	0.20556	0.030741758241758253	0.6870613909868647	1.5122712971207057	0.7656003604415409
ATP1A1	476	0.054155	0.09245879120879119	1.2663614398297405	1.0340517887562914	0.7652624464969587
DMKN	93099	0.019926	0.10556318681318681	1.7005798740179712	0.9764875074772732	0.7649808515431403
EXOC8	149371	0.0033174	0.11293956043956048	2.47920215967762	0.947153906868706	0.7637981527371029
EPM2AIP1	9852	0.088989	0.0809065934065934	1.050663673518547	1.0920160845259357	0.7636291957648119
RNF181	51255	0.11171	0.07293956043956043	0.9519079481876277	1.1370368582315682	0.7629533678756477
TMEM43	79188	0.18619	0.04083791208791208	0.730043648067048	1.3889364701080995	0.7628407298941203
AQP1	358	0.053203	0.09424450549450551	1.2740638781051086	1.0257439599866263	0.7625591349403019
PPP6R1	22870	0.26206	0.0014560439560439553	0.5815992633151129	2.836825514048267	0.7623901779680108
AMPD2	271	0.14227	0.060879120879120896	0.8468866684893908	1.2155316275926638	0.7622775399864834
STOML1	9399	0.045739	0.09697802197802201	1.3397133346840013	1.0133266782612333	0.7621085830141924
SMPD4	55627	0.0058803	0.11270604395604392	2.230600516607365	0.9480527939239253	0.7620522640234287
NIBAN1	116496	0.13532	0.06418956043956044	0.868638010884057	1.1925355982887238	0.7619396260419014
YPEL2	388403	0.086254	0.08248626373626375	1.0642207555283523	1.0836183675741122	0.7619396260419014
PAQR6	79957	0.18895	0.04061813186813188	0.7236531037469667	1.3912800547869195	0.7613764361342644
MARK2	2011	0.20199	0.03490384615384615	0.6946701308123922	1.4571267142626678	0.7607006082451002
RPUSD2	27079	0.033072	0.10229395604395602	1.480539540716787	0.9901500254696679	0.7602500563189908
EXT2	2132	0.013986	0.1104532967032967	1.8543064760957797	0.9568213171969517	0.7594615904482992
PCGF2	7703	0.095044	0.08082417582417582	1.0220752943602316	1.0924587152575447	0.7594615904482992
CRELD1	78987	0.25441	0.009285714285714283	0.5944658220351621	2.0321846833714012	0.7592363144852444
GRHL1	29841	0.1225	0.07130494505494507	0.9118639112994488	1.1468803504341878	0.7591799954944808
SLC29A1	2030	0.16136	0.05456043956043957	0.792204114795291	1.2631221394896934	0.7590673575129534
SPINT2	10653	0.096168	0.08065934065934063	1.0169694158556941	1.0933453324050233	0.7588984005406623
MAP6D1	79929	0.13441	0.06635989010989012	0.8715684189067534	1.1780943418265173	0.7586168055868439
COMP	1311	0.06265	0.09320054945054944	1.2030789246698312	1.0305815273172814	0.7586168055868439
SSB	6741	0.096031	0.08074175824175822	1.0175885486721765	1.0929017975764435	0.7585604865960802
MAPK9	5601	0.24664	0.013736263736263736	0.6079364882815481	1.8621313793130372	0.7585604865960802
SCN5A	6331	0.12045	0.0725412087912088	0.9191931956656378	1.1394152118245424	0.7583915296237892
LY75	4065	5.1629e-4	0.11682692307692308	3.287106286703461	0.9324570613644494	0.757884658706916
CCNA1	8900	0.16284	0.05476648351648353	0.788238906292638	1.2614851436506427	0.7574341067808065
SAT2	112483	0.17293	0.04953296703296703	0.7621296585232623	1.3051056569266541	0.7570398738454607
CRACR2B	283229	0.24712	0.014368131868131876	0.6070921047066058	1.8425996947817815	0.7569272358639333
SBNO2	22904	0.24957	0.013228021978021984	0.6028076209828135	1.8785050921885025	0.7569272358639333
RRP36	88745	0.16589	0.053585164835164824	0.7801797928527624	1.270955429001246	0.7568709168731697
DUSP6	1848	0.074525	0.08982142857142858	1.1276980152953318	1.046620041950273	0.7568709168731697
CAMK2A	815	0.22347	0.027513736263736255	0.6507807710061109	1.560450430019461	0.7566456409101149
ODC1	4953	0.13622	0.06686813186813191	0.86575912405341	1.1747808097550094	0.7565893219193512
SCNN1D	6339	0.0020806	0.11638736263736264	2.681811405848204	0.9340941729061542	0.7564766839378239
NIT1	4817	0.25088	0.012925824175824179	0.6005339589956556	1.8885417558857802	0.7564766839378239
C5orf22	55322	0.027627	0.10637362637362638	1.5586662723105185	0.9731660350126999	0.7563640459562965
CLEC3B	7123	2.4254e-4	0.11791208791208793	3.6152166267660077	0.9284416703551425	0.7562514079747691
RAC1	5879	0.036401	0.10348901098901098	1.4388866853477453	0.9851057634457884	0.7558008560486597
SEH1L	81929	0.14297	0.06478021978021978	0.8447550828238138	1.1885575828899857	0.7556318990763685
RNF103	7844	0.07396	0.09074175824175824	1.1310030975128647	1.0421928099576419	0.7553503041225501
CTSB	1508	0.24074	0.0189010989010989	0.6184517438089011	1.7235129454135447	0.7552939851317865
SMIM14	201895	0.054514	0.09811813186813186	1.263491950164694	1.008250729188495	0.7534354584365848
VPS18	57617	0.24775	0.017074175824175825	0.6059863368426871	1.7676602506713923	0.7529285875197117
DSTN	11034	0.1588	0.05895604395604394	0.7991495019089225	1.2294716660191238	0.7527033115566569
SLC66A1	54896	0.23657	0.02310439560439561	0.6260403301245331	1.6363053878511438	0.7525343545843658
ZCWPW1	55063	0.16156	0.05792582417582418	0.7916661555020493	1.2371277782981738	0.7524217166028385
HIVEP2	3097	0.0085728	0.11543956043956043	2.066877308071885	0.9376453355791222	0.7523090786213111
SYN2	6854	0.081389	0.08956043956043956	1.0894342875200917	1.047883783581117	0.7522527596305474
GATA4	2626	0.082466	0.08921703296703296	1.0837250703096435	1.0495522239039905	0.7521964406397837
STRN3	29966	0.20616	0.038131868131868155	0.6857955944571517	1.4187119175302196	0.751802207704438
CSNK1A1	1452	0.13197	0.07185439560439562	0.8795247833034746	1.1435466592856012	0.7517458887136742
CDK5	1020	0.25416	0.014244505494505493	0.594892798180909	1.8463526229239962	0.7517458887136742
WDR41	55255	3.6104e-4	0.11961538461538461	3.4424446794879104	0.9222129589439805	0.7515769317413832
CLCNKA	1187	0.011157	0.11473901098901099	1.952452566921365	0.9402888979071793	0.7512953367875648
FAM166C	339778	0.11425	0.07749999999999999	0.9421437912581122	1.1106982974936899	0.7512953367875648
PCGF1	84759	0.072906	0.09353021978021982	1.137236728751105	1.029048045134694	0.7506758278891642
SNRNP70	6625	0.21868	0.03293956043956043	0.6601909347804804	1.4822822005502074	0.7506195088984006
AP2S1	1175	0.26756	0.00668956043956044	0.5725788127194043	2.1746024180984027	0.7505631899076368
GBP5	115362	0.12233	0.07543956043956043	0.9124670242659063	1.1224008507483196	0.7503942329353458
PLCD1	5333	0.14015	0.06906593406593407	0.8534068979036951	1.160736110299117	0.750168956972291
NOL6	65083	0.12071	0.07633241758241757	0.9182567500772789	1.117290982527658	0.750168956972291
C1orf216	127703	0.0031443	0.11850274725274727	2.502476024296459	0.9262715812751566	0.7501126379815274
KLHL18	23276	0.13322	0.07206043956043955	0.8754305706791597	1.1423030930587026	0.7498873620184726
PLXDC2	84898	0.028614	0.1090521978021978	1.5434214271824893	0.9623655773686511	0.7498873620184726
FBXO17	115290	0.25371	0.016167582417582423	0.5956624146890728	1.7913549164696023	0.7498873620184726
ADAMTS9	56999	0.14222	0.06822802197802197	0.8470393256957512	1.166037219317814	0.7497747240369452
SRP68	6730	0.2007	0.04151098901098901	0.6974526275125145	1.3818369193100306	0.7493241721108358
RBBP6	5930	0.048557	0.10282967032967032	1.313748153145586	0.9878815565346342	0.7489862581662536
PNPLA8	50640	0.044686	0.10438186813186812	1.3498285188163857	0.9813749348028269	0.7488173011939626
YBEY	54059	0.12259	0.07633241758241757	0.9115449549558349	1.117290982527658	0.7487046632124352
ARRB1	408	0.089768	0.08791208791208792	1.0468784506396547	1.0559514053291499	0.7486483442216716
ARL10	285598	0.17036	0.05596153846153845	0.7686323685982888	1.2521103546488919	0.7482541112863258
RNF145	153830	0.026271	0.1111401098901099	1.5805233955726607	0.9541291781404835	0.7479161973417436
SLURP1	57152	0.20225	0.04167582417582418	0.69411146971569	1.3801158028623255	0.7479161973417436
ATP6V1D	51382	0.1736	0.05509615384615385	0.7604502791595269	1.2588787173313905	0.74785987835098
RPS6KA1	6195	0.21127	0.037774725274725265	0.675162167687157	1.4227986854827745	0.7475782833971615
TMEM74B	55321	0.24654	0.021195054945054945	0.608112608354485	1.673765453249889	0.7475219644063978
UBE2C	11065	0.20289	0.04163461538461539	0.6927393578549949	1.380545442945415	0.7475219644063978
UBE2F	140739	0.14805	0.0671291208791209	0.829591588274682	1.1730890402848653	0.7470714124802883
CLK2	1196	0.20605	0.04083791208791209	0.6860273811393929	1.3889364701080993	0.7465645415634152
UBALD1	124402	0.26792	0.00916208791208791	0.5719948654681896	2.0380055453964885	0.7465082225726515
MICALL2	79778	0.20517	0.04118131868131867	0.6878861415473077	1.3852997508007767	0.7463955845911241
DUSP4	1846	0.25295	0.01884615384615385	0.5969653162554138	1.7247772679423041	0.7463955845911241
SLC9A3R2	9351	0.19545	0.045288461538461555	0.708964325231734	1.344012432169884	0.7462829466095967
PSMA1	5682	0.0026414	0.12061813186813189	2.5781658264952214	0.9185874021595827	0.7461703086280694
PRSS23	11098	0.069822	0.09689560439560439	1.1560077152966375	1.0136959239815664	0.7459450326650147
SPSB1	80176	0.067259	0.09791208791208791	1.172249594019754	1.0091636882842188	0.7458887136742509
TOR4A	54863	0.1368	0.07285714285714284	0.8639139026159026	1.1375278639163207	0.7457197567019599
UBE2R2	54926	0.23272	0.029780219780219785	0.6331662917609973	1.5260721014466878	0.7456634377111963
PIK3R1	5295	0.12133	0.07828296703296707	0.9160318024015844	1.1063327223392063	0.7456071187204325
PITHD1	57095	0.21738	0.03646978021978023	0.6627804155818195	1.4380668538955492	0.7454381617481415
SEC24C	9632	0.23937	0.02612637362637364	0.6209302802072536	1.582920866711642	0.7453818427573777
ADAM15	8751	0.23329	0.02990384615384615	0.6321038768851933	1.524272950271943	0.7450439288127957
MCTP1	79772	0.12299	0.07796703296703296	0.9101301984904482	1.1080889925276007	0.7449876098220319
PVR	5817	0.26723	0.010618131868131871	0.5731147883255985	1.9739518853947122	0.7449876098220319
TMEM150A	129303	0.14178	0.07171703296703297	0.8483850279839874	1.1443776861023216	0.7447060148682135
ISCA2	122961	0.16541	0.06065934065934065	0.7814382383533741	1.2171023145918947	0.7445370578959225
SSH2	85464	0.071109	0.09726648351648352	1.1480754287642552	1.0120367849263363	0.7442554629421041
TSR1	55720	0.14994	0.06815934065934068	0.8240824934899064	1.1664746193768467	0.7440301869790493
AFF4	27125	0.1651	0.06096153846153848	0.7822529267372064	1.2149440814170476	0.7436922730344673
CIZ1	25792	0.2072	0.04174450549450548	0.6836102489268046	1.3794006792330944	0.7436922730344673
PTPRE	5791	0.043438	0.10722527472527474	1.3621301790214093	0.9697028323678073	0.7435796350529399
SRPK2	6733	0.24316	0.025137362637362635	0.6141078652875965	1.5996802895826077	0.7435233160621761
LYL1	4066	0.15402	0.0660989010989011	0.812422880944913	1.1798057606452301	0.7434669970714125
GFI1B	8328	0.0034346	0.12149725274725276	2.464123834414655	0.9154335420672952	0.7432980400991214
LRRC32	2615	0.0022691	0.12239010989010991	2.6441463641894574	0.9122536752761623	0.7428474881730119
URM1	81605	0.062893	0.10068681318681318	1.2013976889036448	0.9970274046719093	0.7427911691822483
SGSM2	9905	0.26498	0.014203296703296703	0.5767869042421506	1.8476108405551135	0.7421716602838477
UBQLN4	56893	0.035748	0.11042582417582418	1.4467482507373315	0.9569293506507185	0.742115341293084
SP110	3431	0.26825	0.0118956043956044	0.5714602693620113	1.9246134872956904	0.742115341293084
FAU	2197	0.051735	0.1050961538461539	1.286215546576928	0.9784131773490774	0.742115341293084
UBE2Z	65264	0.24995	0.023118131868131882	0.602146858911391	1.6360472633372132	0.7418337463392656
KLK7	5650	0.11313	0.08273351648351648	0.9464222128747174	1.0823185161424567	0.741045280468574
DUS2	54920	0.11783	0.08119505494505495	0.9287441223187045	1.0904704199641497	0.7409889614778103
L3MBTL2	83746	0.22315	0.03638736263736264	0.6514031088234518	1.439049421015806	0.7402004956071188
POLG	5428	0.0016548	0.124010989010989	2.7812544877765255	0.9065398289073128	0.739975219644064
ERGIC3	51614	0.16298	0.06458791208791209	0.7878656865319827	1.1898487545241165	0.739806262671773
KCNJ2	3759	0.21748	0.03986263736263736	0.6625806756703269	1.3994339712113202	0.7397499436810092
BMPR2	659	0.23814	0.030563186813186812	0.623167650709193	1.514801363996087	0.7396373056994818
ST6GALNAC6	30815	0.2692	0.012967032967032967	0.5699249444480607	1.8871593850149682	0.7395809867087182
ZNF557	79230	0.050702	0.10668956043956045	1.2949749090723381	0.9718780741585027	0.7395809867087182
JADE2	23338	0.032321	0.11285714285714289	1.4905152107760598	0.9474709487238153	0.7394683487271908
KHDRBS3	10656	0.097473	0.09012362637362642	1.0111156671209955	1.0451613415557375	0.738905158819554
C11orf21	29125	0.16683	0.06304945054945056	0.7777258502034372	1.200318693775776	0.7386798828564992
ACTN1	87	0.19166	0.05263736263736265	0.717468516187772	1.2787058789065302	0.7385672448749718
DVL1	1855	0.17687	0.05870879120879122	0.7523458241809761	1.2312968614849866	0.7383419689119171
MYD88	4615	0.26398	0.01752747252747253	0.5784289754735995	1.7562807049278937	0.7383419689119171
ADD1	118	0.068001	0.10140109890109891	1.1674847006571667	0.9939573384533987	0.7382856499211534
GUCY1A1	2982	0.22288	0.03787087912087912	0.6519289009201118	1.4216946132072634	0.7378350979950439
AP2A2	161	0.28712	0.002046703296703297	0.5419365546748166	2.688945110900763	0.7375535030412255
OARD1	221443	0.11125	0.08532967032967033	0.9536999803470307	1.0688999322565162	0.7372719080874071
DAPK3	1613	0.22396	0.03789835164835162	0.6498295411770538	1.421379678833852	0.7372719080874071
CHRDL2	25884	0.11699	0.08324175824175824	0.9318512590267063	1.079658755146751	0.7372155890966434
CCN3	4856	0.064825	0.10331043956043956	1.188257474558611	0.9858557906351583	0.7371592701058797
CCDC92	80212	0.28365	0.004876373626373627	0.547217212099279	2.311903026257943	0.7371592701058797
TGM2	7052	0.088296	0.09501373626373624	1.054058970457267	1.0222136036343563	0.7371592701058797
PATL1	219988	0.01951	0.11822802197802194	1.709742730605482	0.9272795763473765	0.7364834422167155
LRRC8B	23507	0.084576	0.09671703296703296	1.0727528585483836	1.0144970349947822	0.7356949763460239
SAA2	6289	0.039182	0.11244505494505495	1.4069133997145502	0.9490596390037864	0.7356949763460239
KNCN	148930	0.15547	0.07070054945054945	0.8083534014372692	1.1505772110628676	0.7353570624014417
CABYR	26256	0.18783	0.056346153846153865	0.7262350414952211	1.2491357232806894	0.7353570624014417
CABLES2	81928	0.22508	0.03876373626373626	0.647663093518045	1.411574369894708	0.7347938724938049
CACNA2D2	9254	0.15364	0.07195054945054946	0.8134957015068615	1.1429658852238238	0.7345685965307501
SLC30A3	7781	0.13668	0.07844780219780222	0.8642950298732748	1.1054192191482655	0.7344559585492227
PRKAR1B	5575	0.033064	0.11449175824175825	1.4806446077263482	0.9412257751490131	0.7342306825861681
NDUFS6	4726	0.22196	0.040192307692307694	0.6537252838578718	1.3958570575237452	0.7340054066231133
SCHIP1	29970	0.21978	0.041346153846153845	0.6580118309518115	1.3835648837191938	0.7338364496508223
MPP2	4355	0.19378	0.055013736263736276	0.7126910484300276	1.2595288588927807	0.7334422167154765
MPDU1	9526	0.22126	0.04104395604395603	0.6550970919445941	1.3867507861696762	0.7332732597431854
MXI1	4601	0.046171	0.1116071428571429	1.3356307191291976	0.952308009662125	0.7331606217616581
SLC39A6	25800	9.2105e-4	0.12804945054945055	3.035716793109684	0.8926222807164703	0.7331043027708943
SCAP	22937	0.15042	0.07395604395604395	0.8226944156581398	1.1310263280971167	0.7328790268078396
WDR61	80349	0.10763	0.08972527472527474	0.9680666597243945	1.0470852032484066	0.7327100698355485
SAC3D1	29901	0.032516	0.1154807692307692	1.4879028851189868	0.9374903318958744	0.7325974318540212
HK1	3098	0.0050086	0.12627747252747254	2.3002836508278257	0.8986741191963296	0.7323158369002027
RAC3	5881	0.2019	0.051346153846153854	0.6948636810563608	1.2894920822702238	0.7322595179094391
NAA38	84316	0.25662	0.025906593406593403	0.5907094993595453	1.5865896909117276	0.7321468799279117
HP1BP3	50809	0.056365	0.10848901098901101	1.2489904886625092	0.9646142499125118	0.732090560937148
BRD9	65980	0.12433	0.08392857142857145	0.905424066350751	1.076090169070483	0.7320342419463843
BTBD1	53339	0.18894	0.05795329670329671	0.7236760889798125	1.2369218539311562	0.7316963280018022
SMAP2	64744	0.20278	0.0514010989010989	0.6929748812813276	1.289027596149046	0.7315836900202748
TRAFD1	10906	0.19697	0.05462912087912087	0.705599915090189	1.262575788327057	0.7315273710295112
ICAM2	3384	0.096282	0.09465659340659338	1.016454897001677	1.0238491293983487	0.7314147330479838
ITSN2	50618	0.16998	0.06592032967032967	0.7696021750959192	1.1809806293806158	0.731189457084929
PPL	5493	0.21783	0.04395604395604396	0.6618823085231418	1.3569814009931311	0.7309641811218743
S1PR4	8698	0.010471	0.12436813186813188	1.9800118404087148	0.9052908891538037	0.7309641811218743
FOXN1	8456	0.19539	0.05563186813186815	0.7090976671062551	1.2546763560983685	0.730851543140347
PWWP3A	84939	0.092569	0.09644230769230769	1.0335344278211929	1.0157324062783624	0.73028835323271
ARHGDIA	396	0.27988	0.012596153846153839	0.553028134759897	1.8997620436430163	0.7301757152511827
ANP32B	10541	0.012935	0.12364010989010989	1.8882335669474377	0.90784061761191015	0.730119396260419
PEX2	5828	0.074142	0.10381868131868133	1.1299357029402763	0.9837244917320415	0.7300630772696554
CCDC115	84317	0.014924	0.12295329670329669	1.8261147596312086	0.9102598221846729	0.7300067582788916
PDPK1	5170	0.19606	0.0559478021978022	0.7076110016980686	1.2522169692270395	0.7298378013066006
ZNRD2	10534	0.17985	0.06296703296703297	0.74508955784547	1.2008867703537036	0.729049335435909
JTB	10899	0.24086	0.034505494505494505	0.6182353179828757	1.4621117442478786	0.7289930164451452
GIMAP5	55340	0.02077	0.12122252747252751	1.682563503464901	0.9164166652531769	0.7289366974543816
LSM14A	26065	0.17633	0.06453296703296704	0.7536737924876301	1.19021836687145	0.7287114214913268
PLCD3	113026	0.0018256	0.12962912087912087	2.7385943729258604	0.8872974242644971	0.7285987835097995
ILF3	3609	0.29012	0.00778846153846154	0.5374223312102914	2.1085483204201303	0.7285987835097995
SHISA4	149345	0.13869	0.08074175824175826	0.8579548518422558	1.0929017975764432	0.7284298265375084
CACNG4	27092	0.17043	0.06726648351648352	0.768453956003079	1.172201275294819	0.7283735075467448
RAB5B	5869	0.061416	0.10875	1.2117184724012084	0.9635707343733251	0.7282608695652174
RCC1L	81554	0.2491	0.03171703296703296	0.6036262724634935	1.498707446395861	0.7282045505744537
ADAMTS14	140766	0.11014	0.09105769230769233	0.9580549278547362	1.0406833602955068	0.7280355936021626
AFG3L2	10939	0.027229	0.11875000000000002	1.5649683080708565	0.9253663817030957	0.7280355936021626
DDX5	1655	0.24716	0.03244505494505496	0.6070218134574593	1.488851486035541	0.727979274611399
PLXND1	23129	0.29757	0.0024038461538461535	0.5264108550186203	2.6190933306267428	0.7275287226852895
TREM2	54209	0.0811	0.10258241758241757	1.090979145788844	0.9889270700359966	0.7274724036945258
CAMTA2	23125	0.28861	0.009629120879120882	0.5396886251843848	2.0164133613463786	0.7267402568145979
SMIM11A	54065	0.20197	0.055096153846153836	0.6947131345238743	1.2588787173313905	0.7267402568145979
LTBP3	4054	0.16991	0.06887362637362637	0.7697810601126189	1.1619470496908395	0.7266839378238342
MYLK	4638	0.072374	0.10623626373626373	1.140417423920566	0.9737272115759905	0.7265149808515431
LILRB3	11025	0.095954	0.09714285714285714	1.0179369162727665	1.0125891273080205	0.7262333858977247
DDX28	55794	0.19869	0.056923076923076917	0.7018239902334494	1.2447116325758607	0.7260644289254337
MESP2	145873	0.15603	0.07534340659340658	0.8067918915055055	1.1229547474023074	0.7255575580085605
PATZ1	23598	0.17821	0.06590659340659344	0.7490679297998866	1.1810711356812251	0.7255012390177968
USP50	373509	0.087566	0.10086538461538463	1.0576644883373616	0.9962578511052224	0.7253886010362695
PPP1R3D	5509	0.059023	0.11111263736263736	1.2289787201099682	0.9542365438967543	0.7253886010362695
PDAP1	11333	0.29861	0.0033791208791208796	0.5248956524981372	2.471196272209658	0.7251633250732147
THEG	51298	0.050134	0.11357142857142856	1.299867643309859	0.9447309113577866	0.7251633250732147
ARID4B	51742	0.22351	0.04449175824175825	0.6507030414462983	1.3517204313028601	0.7248817301193963
DAGLB	221955	0.21442	0.049423076923076924	0.6687347083237741	1.3060702203035046	0.7248817301193963
CIB1	10519	0.26789	0.023722527472527476	0.5720434977612439	1.6248390417455782	0.7247690921378689
MVB12A	93343	0.2376	0.03924450549450549	0.6241535636908441	1.4062211389302943	0.7247127731471052
HEXIM2	124790	0.013776	0.125989010989011	1.8608768658904205	0.8996673332551359	0.7245438161748141
ZNF76	7629	0.2273	0.04310439560439559	0.6434005642750292	1.3654784400621194	0.7244874971840505
PKP3	11187	0.29904	0.0035851648351648354	0.5242707159652432	2.4454908719747563	0.7244311781932867
CDC42EP4	23580	0.25733	0.030384615384615392	0.5895095799965522	1.5173462566803764	0.7244311781932867
CERS2	29956	0.19782	0.05843406593406593	0.7037298024732034	1.233333893746327	0.7243185402117595
PSMD8	5714	0.020279	0.1237774725274725	1.6929534647819815	0.9073583896233202	0.7241495832394683
OVOL1	5017	0.21973	0.047087912087912104	0.6581106442857008	1.3270905660618766	0.7239243072764137
NRXN2	9379	0.21005	0.052403846153846155	0.6776773141259892	1.280636837022138	0.7238679882856499
PKM	5315	0.29184	0.010618131868131864	0.5348551833516778	1.9739518853947124	0.7230795224149583
IFI16	3428	0.14223	0.0821153846153846	0.847008789961381	1.0855754686097754	0.7229668844334309
YY1	7528	0.098881	0.09793956043956044	1.004887150140718	1.0090418494611717	0.7226852894796125
UNC119	9094	0.2709	0.0232967032967033	0.5671909949668318	1.6327055313923422	0.7226852894796125
SERTAD3	29946	0.25883	0.030535714285714294	0.5869853876657537	1.5151919166140464	0.7225163325073215
DNAJC1	64215	0.16179	0.07476648351648352	0.7910483249921751	1.1262930449959634	0.7224036945257941
FAM107B	83641	0.021155	0.12464285714285712	1.6745869703326866	0.9043326043830394	0.7222910565442667
GPR4	2828	0.28605	0.0143956043956044	0.5435580478983131	1.8417700966653292	0.7221220995719757
SPTAN1	6709	0.21888	0.04905219780219781	0.6597939199599778	1.3093415291202553	0.7219531425996846
SPOUT1	51490	0.16464	0.07381868131868134	0.7834646425816423	1.1318337172158874	0.7218968236089209
BCAT1	586	0.077473	0.10671703296703296	1.1108496264494436	0.9717662578649131	0.7217841856273935
EIPR1	7260	0.025637	0.12248626373626377	1.5911327966131807	0.9119126126711737	0.7216715476458662
SLC35D3	340146	0.016205	0.12682692307692303	1.7903509646317712	0.8967885437524152	0.7213899526920478
S100A11	6282	0.0011901	0.1333379120879121	2.924416544806187	0.8750463496889151	0.7213336337012841
FAM131B	9715	0.26162	0.030247252747252738	0.5823290586748897	1.5193140646773045	0.7212209957197567
ZNF804A	91752	0.040264	0.11793956043956044	1.395083082610917	0.9283404951696171	0.721164676728993
PAX3	5077	0.11757	0.09186813186813186	0.9297034818022349	1.0368351148820771	0.7208830817751746
ZNF160	90338	0.19051	0.06342032967032966	0.7200822229761048	1.197771504761896	0.7206578058121198
A1BG	1	0.036761	0.1189835164835165	1.4346126831244777	0.9245131999192137	0.7206578058121198
TERT	7015	0.012997	0.1284065934065934	1.8861568810625131	0.8914126755928479	0.720263572876774
CASKIN2	57513	0.26526	0.028887362637362645	0.5763282347104823	1.539292106626716	0.7199819779229556
RGS19	10287	0.28601	0.016359890109890113	0.5436187820146802	1.7862196178302596	0.7198693399414282
COX14	84987	0.077086	0.10832417582417585	1.1130244893269288	0.9652746065758327	0.7190808740707366
DCAKD	79877	0.23465	0.04343406593406593	0.6295794414514865	1.362169513716847	0.7190808740707366
GUCY1B1	2983	0.0062466	0.13173076923076923	2.204356303139081	0.8803127721423736	0.719024555079973
CYLD	1540	0.020945	0.12626373626373627	1.6789196353027618	0.8987213636328084	0.7189682360892092
HMGN1	3150	0.0079527	0.13114010989010988	2.0994854001452543	0.8822644567481344	0.718855598107682
MASP2	10747	0.17685	0.07065934065934065	0.7523949358492296	1.1508304193968715	0.7186866411353908
TMEM9B	56674	0.21132	0.05521978021978023	0.6750593979850983	1.257905326228567	0.7186303221446272
MRPL28	10573	0.07811	0.10842032967032965	1.1072933621943344	0.9648892765076719	0.7182360892092814
PPP2R2A	5520	0.25709	0.033901098901098894	0.5899148157308518	1.4697862239518331	0.7177292182924082
RUSC1	23623	0.046819	0.11780219780219779	1.3295778665710452	0.9288466069643424	0.7174476233385898
TEAD4	7004	0.11796	0.09388736263736264	0.9282652361202396	1.0273928604091962	0.717222347375535
DUOX1	53905	0.19114	0.06556318681318679	0.7186484183272625	1.1833399449467934	0.7169970714124803
ADAMTS7	11173	0.0050592	0.1340521978021978	2.295918151747885	0.8727260613115212	0.7165465194863708
TRIM63	84676	0.20073	0.061208791208791184	0.6973877154009067	1.213186197147365	0.7164902004956071
NR1H2	7376	0.24216	0.04109890109890111	0.6158975920514835	1.3861697901206134	0.7164338815048434
SLC2A1	6513	0.09567	0.1029120879120879	1.0192242260373783	0.9875336106098375	0.716152286551025
PSRC1	84722	0.0049993	0.13451923076923078	2.301090801147931	0.8712156248069527	0.7158706915972066
EHD1	10938	0.12244	0.09346153846153846	0.912076679074703	1.0293670743725059	0.7157017346249155
GDPD5	81544	0.036044	0.12179945054945056	1.4431670189823205	0.9143546708482988	0.7155890966433881
RTCA	8634	0.19365	0.0656456043956044	0.7129824986778984	1.1827943487922432	0.7154201396710971
MAPK1IP1L	93487	0.12928	0.09120879120879119	0.888468656569489	1.0399632999450197	0.715251182698806
LMF1	64788	0.24126	0.04232142857142857	0.6175146765134453	1.3734396809960965	0.715082225726515
PPFIA3	8541	0.073882	0.11162087912087913	1.1314613566372203	0.9522545613226443	0.715082225726515
COPB1	1315	0.02269	0.12756868131868135	1.644165504115064	0.8942559337650039	0.7146879927911692
EML2	24139	0.30807	0.004354395604395605	0.511350591422798	2.3610721170952855	0.7144063978373507
PTPN21	11099	0.2104	0.05820054945054944	0.6769542645182985	1.2350729153120477	0.7140121649020049
SLC25A39	51629	0.18105	0.07199175824175826	0.7422014708469695	1.1427172196104438	0.7138995269204775
PSMB7	5695	0.0030133	0.13644230769230772	2.52095762841337	0.8650509438413062	0.7137868889389503
ZNF581	51545	0.28675	0.019807692307692314	0.5424965734266947	1.7031661189296268	0.7137868889389503
B4GALT2	8704	0.25029	0.03972527472527473	0.6015565016965155	1.400933090690544	0.7136179319666591
TBC1D22A	25771	0.21572	0.05657967032967033	0.6661095883838752	1.2473395873566195	0.7130547420590223
CD2AP	23607	0.060025	0.11596153846153842	1.221667831270935	0.935686031494648	0.7129984230682587
ZNF473	25888	0.16361	0.07914835164835163	0.7861901553584987	1.101558125368643	0.7127168281144401
PARP8	79668	0.0020776	0.13712912087912088	2.6824380633787537	0.8628703081999367	0.7126605091236765
C1QTNF12	388581	0.013606	0.1318131868131868	1.8662695333754513	0.8800411400172442	0.7125478711421491
CERS4	79603	0.090073	0.1067857142857143	1.045405372265143	0.9714868430177895	0.7125478711421491
RBFA	79863	0.27016	0.030439560439560438	0.5683789523726449	1.516561623256645	0.7124352331606217
SIRPB2	284759	0.20415	0.06210164835164835	0.690050615740984	1.206896872278743	0.7124352331606217
TXNL4A	10907	0.035633	0.12365384615384613	1.448147612153665	0.9077923707105772	0.7123225951790944
SRGN	5552	0.018072	0.13026098901098898	1.7429937820876933	0.8851856287537951	0.7120973192160397
C14orf180	400258	0.1832	0.07215659340659343	0.7370745306681684	1.1417239785099285	0.7120973192160397
FAM189B	10712	0.22185	0.05425824175824173	0.6539405669474263	1.265534283686577	0.7120410002252759
EML1	2009	0.2915	0.018585164835164834	0.5353614409049672	1.7308335827154142	0.7119283622437486
P4HB	5034	0.28011	0.02482142857142856	0.5526713864734829	1.6051732267521055	0.7118720432529849
CCDC74B	91409	0.024648	0.1281456043956044	1.6082183146911158	0.8922962862372397	0.7118157242622212
ATP12A	479	0.19192	0.06861263736263737	0.7168797650402258	1.163595886751036	0.7114214913268754
ANKIB1	54467	0.0037976	0.13695054945054952	2.4204907812896965	0.8634362210013813	0.7113651723361117
UBE2I	7329	0.111	0.09935439560439562	0.9546770212133425	1.002812914215921	0.7111962153638207
ASH1L	55870	0.013232	0.1324725274725275	1.8783745077915286	0.8778741776076211	0.711139896373057
PRKD2	25865	0.31393	0.0022664835164835162	0.5031671799613086	2.644647435099131	0.711139896373057
TMEM120A	83862	0.26597	0.03331043956043957	0.5751673467118693	1.4774196363747547	0.7106330254561838
TNFSF12	8742	0.16923	0.0778708791208791	0.7715226455549439	1.1086249223220672	0.7104640684838928
CSNK2B	1460	0.28883	0.02098901098901099	0.5393576997526806	1.678008025073366	0.7104077494931291
ATP6V0A2	23545	0.20107	0.06506868131868132	0.696652722075418	1.1866279945850804	0.710238792520838
CD22	933	0.17266	0.07703296703296705	0.7628082634248612	1.1133233743544348	0.710069835548547
TNK1	8711	0.24017	0.045714285714285714	0.6194812419295698	1.3399480616943509	0.7100135165577833
ELP6	54859	0.067171	0.11539835164835165	1.1728181861475016	0.9378003946043588	0.709900878576256
NEDD9	4739	0.036039	0.12494505494505499	1.4432272682064926	0.9032809276333587	0.7098445595854922
JUND	3727	0.28885	0.021538461538461538	0.5393276281225685	1.6667853209646175	0.7096192836224375
TPM3	7170	0.089091	0.10880494505494503	1.0501661663083217	0.9633513660232117	0.7095066456409101
SSH3	54961	0.19179	0.07030219780219783	0.7171740408464732	1.1530310977618703	0.7090560937148006
BCAR1	9564	0.17027	0.07807692307692307	0.7688618639702809	1.107477310057605	0.7089434557332732
ZNF197	10168	0.0025946	0.1388186813186813	2.5859295862481986	0.8575520854108255	0.7088871367425096
PIGY	84992	0.14857	0.08679945054945054	0.828068876644033	1.0614830239490491	0.7086618607794548
SLC44A2	57153	0.29875	0.016359890109890116	0.5246920860438059	1.7862196178302596	0.708098670871818
KRT34	3885	0.12625	0.09616758241758241	0.898768613209301	1.0169713016610913	0.7080423518810542
YME1L1	10730	0.12333	0.09711538461538463	0.9089312684999878	1.0127119655161376	0.7077044379364722
DNASE2	1777	0.03733	0.12571428571428572	1.4279420100736955	0.9006153678640881	0.7074228429826538
ZBTB17	7709	0.19359	0.07072802197802198	0.7131170801732125	1.1504084874858025	0.7072538860103627
PRR4	11272	0.10002	0.10589285714285715	0.9999131497883511	0.9751333336419378	0.7069722910565442
BCKDHA	593	0.29485	0.020288461538461543	0.5303988678861746	1.6927508840010876	0.7069722910565442
IMP4	92856	0.0057087	0.1386675824175824	2.2434627791632114	0.8580250560333792	0.7065780581211984
IRS2	8660	0.30836	0.010412087912087916	0.5109419630009382	1.9824621736809835	0.7065217391304348
MLLT6	4302	0.10647	0.10447802197802197	0.9727727459327448	0.9809750582374736	0.70629646316738
RUNX1T1	862	0.011479	0.13645604395604397	1.9400959441155947	0.8650072236538326	0.706127506195089
SON	6651	0.29828	0.01787087912087912	0.525375865581386	1.747854082751451	0.7060148682135616
SLC66A1L	152078	0.015183	0.13517857142857143	1.81864240797155	0.8690921475061276	0.7059585492227979
SATB2	23314	0.30191	0.015494505494505501	0.5201225018397915	1.8098222796657135	0.7057895922505069
CLCNKB	1188	0.0067755	0.13865384615384616	2.1690586503829246	0.8580680789153701	0.7055643162874521
AUP1	550	0.25218	0.04347527472527473	0.5982893596109193	1.3617576649596632	0.7055079972966884
PPP1R7	5510	0.31011	0.009752747252747253	0.5084842290068025	2.0108730305939617	0.7055079972966884
PSMD5	5711	0.19243	0.0723763736263736	0.7157272201422747	1.140403180740249	0.7053953593151611
KLF10	7071	0.22447	0.05710164835164836	0.6488416934359725	1.2433513548068222	0.7053390403243974
EMC1	23065	0.24011	0.04927197802197802	0.6195897522529218	1.3074000026370707	0.7052827213336337
TSPAN1	10103	0.13718	0.09375000000000003	0.8627092014775319	1.0280287236002434	0.7051137643613427
EIF4EBP2	1979	0.070858	0.11646978021978023	1.1496111099935535	0.9337867440481751	0.7048321694075242
SLC7A10	56301	0.17624	0.07793956043956045	0.7538955158572888	1.1082420478532036	0.7048321694075242
TENT4B	64282	0.26403	0.03855769230769231	0.5783467242883565	1.413888966678598	0.7044379364721784
ERGIC1	57222	0.035257	0.12822802197802194	1.4527546443587325	0.8920170570279402	0.7037057895922505
ADRA2B	151	0.1851	0.07574175824175822	0.732593581247096	1.1206646175432824	0.7035931516107231
TUFM	7284	0.087511	0.11247252747252746	1.0579373533886298	0.9489535453225691	0.7035368326199595
IVNS1ABP	10625	0.26266	0.03990384615384613	0.5806060600725779	1.398985242586688	0.7034805136291957
GALNT1	2589	0.22989	0.05592032967032968	0.6384799197236513	1.2524302769336375	0.7034805136291957
MYOM2	9172	0.076384	0.11565934065934068	1.1169976026733395	0.9368192878133876	0.7034241946384321
MTF1	4520	0.2715	0.03494505494505493	0.5662301660751342	1.456614272336661	0.7032552376661411
SHROOM1	134549	0.25731	0.04234890109890111	0.5895433352026863	1.3731578545865288	0.7030299617030863
BRF2	55290	0.1505	0.08950549450549447	0.8224635000701378	1.0481503036765656	0.7029173237215589
RNF169	254225	0.092097	0.11104395604395605	1.0357545164336155	0.9545050744697708	0.7029173237215589
CEP85	64793	0.22456	0.05855769230769232	0.6486676003736173	1.2324160466659049	0.7026357287677405
FMO3	2328	0.14922	0.09027472527472528	0.8261729643464204	1.044433824550013	0.7026357287677405
ZRANB1	54764	0.01694	0.13604395604395603	1.771086594005312	0.8663207476369945	0.7024104528046857
MTUS1	57509	0.19877	0.0714423076923077	0.7016491622808431	1.146044525538205	0.7022978148231583
RFX5	5993	0.034025	0.1294230769230769	1.4682018661246277	0.8879882794108224	0.7022414958323947
CDKN2A	1029	0.034643	0.12905219780219782	1.460384506174587	0.8892345948764927	0.7022414958323947
MEX3D	399664	0.21623	0.06298076923076923	0.6650840516842925	1.2007920393069973	0.7018472628970489
CHMP4B	128866	0.2946	0.024409340659340653	0.5307672574933879	1.6124439515077358	0.7016219869339941
CNN2	1265	0.31303	0.010824175824175832	0.5044140387790724	1.9656051618234816	0.7015656679432305
NTHL1	4913	0.045332	0.1262774725274725	1.3435951199044072	0.8986741191963297	0.7015093489524667
R3HDML	140902	0.039774	0.1279807692307692	1.4004007305988262	0.8928552838241053	0.7013403919801757
TNFRSF18	8784	0.010078	0.13925824175824175	1.99662564598025	0.8561790924256543	0.7012277539986483
DOK1	1796	0.2381	0.05379120879120879	0.6232406045951201	1.269288696181937	0.7008898400540662
KLHL9	55958	0.24941	0.04759615384615385	0.6030861376347276	1.3224281403652116	0.7007208830817752
NPFF	8620	0.21311	0.06504120879120881	0.6713961709196647	1.1868113959737447	0.7007208830817752
KCNH2	3757	0.18665	0.0768956043956044	0.7289720057376766	1.1140984851828937	0.7006645640910115
ACTB	60	0.26371	0.040879120879120885	0.5788734012552013	1.3884984524391961	0.7004956071187204
RAB3IL1	5866	0.25512	0.04501373626373627	0.5932554937650972	1.3466549379306614	0.6999324172110836
TSKU	25987	0.090585	0.11300824175824176	1.0429437113360018	0.9468898820068428	0.6998760982203199
MANF	7873	0.26905	0.03839285714285715	0.5701670036174873	1.415749567090595	0.6997634602387925
CIDEA	1149	0.06932	0.11932692307692311	1.1591414459581206	0.9232615578000504	0.6995381842757378
FCHSD1	89848	0.010806	0.13997252747252747	1.966335036796823	0.8539571953066107	0.699143951340392
C1orf56	54964	0.11212	0.10546703296703297	0.9503169109117515	0.976883271531651	0.6990876323496283
RELL2	285613	0.0069962	0.14164835164835166	2.155137783862479	0.8487884749676905	0.6990876323496283
POU3F1	5453	0.25778	0.044450549450549465	0.5887507806466152	1.3521228663728024	0.6990313133588646
HLTF	6596	0.23913	0.05442307692307691	0.6213659361503976	1.264216908110509	0.6990313133588646
DACT1	51339	0.097	0.11127747252747255	1.0132282657337552	0.9535927471410777	0.6990313133588646
NCLN	56926	0.0032843	0.1431868131868132	2.483557179690879	0.8440969766085089	0.6990313133588646
PTPN1	5770	0.11198	0.105521978021978	0.9508595368410351	0.9766570764838799	0.6990313133588646
PRUNE1	58497	0.15062999999999999	0.0918131868131868	0.8220885239059907	1.0370949380916836	0.6988060373958098
ASAP3	55616	0.021158	0.13667582417582416	1.6745253872046695	0.8643082985673117	0.6985244424419914
B4GALT3	8703	0.3078	0.01670329670329671	0.51173138450454	1.777197804376321	0.6984681234512278
AHSA1	10598	0.017323	0.13811813186813188	1.7613768946152997	0.8597493043802764	0.6982991664789368
CRIM1	51232	0.28094	0.03248626373626373	0.5513864219143785	1.4883002342392069	0.698242847488173
PFDN2	5202	0.28987	0.028914835164835166	0.5377967294833651	1.5388792791413501	0.6981302095066456
SLC39A1	27173	0.29787	0.024189560439560446	0.5259732345846714	1.6163720233457601	0.6977359765712998
TBC1D13	54662	0.25835	0.04490384615384617	0.5877915341183194	1.347716458732668	0.697510700608245
SNX11	29916	0.19677	0.07468406593406593	0.7060411143783024	1.1267720463113264	0.697341743635954
CYTH4	27128	0.10988	0.10744505494505496	0.9590813492514757	0.9688135676969252	0.697341743635954
PLA2R1	22925	0.030492	0.13287087912087914	1.5158140889020058	0.8765701915396921	0.6972854246451904
PSMD13	5719	0.25984	0.0443956043956044	0.5852939924389187	1.3526600272104885	0.6972854246451904
CDH3	1001	0.035519	0.13127747252747257	1.4495392698246132	0.8818097933042807	0.697172786663663
NCF4	4689	0.17953	0.08100274725274727	0.745862969114532	1.0915002515352306	0.697003829691372
NOVA2	4858	3.4585e-4	0.14604395604395604	3.4611122199853	0.8355164113783616	0.6967785537283172
ABCA4	24	0.11332	0.10648351648351644	0.9456934341516003	0.9727176152703285	0.6967222347375535
ADAMTSL2	9719	0.13015	0.10065934065934065	0.8855558275547455	0.9971459186532432	0.6967222347375535
PHACTR3	116154	0.11658	0.10510989010989011	0.9333759490165738	0.978356417957779	0.6966095967560262
ACAA1	30	0.10437	0.11006868131868136	0.9814243165327486	0.9583362365720017	0.6964969587744988
IL11RA	3590	0.0041945	0.14409340659340655	2.377319801267418	0.8413558911194794	0.6963280018022077
HS1BP3	64342	0.16352	0.0875824175824176	0.7864291215453812	1.0575830709249812	0.696102725839153
GSDMD	79792	0.25232	0.049505494505494504	0.5980483240151724	1.3053465970060119	0.696102725839153
ATP6V0E1	8992	0.19073	0.07758241758241757	0.7195809912238003	1.1102366912692898	0.6959900878576256
FLOT2	2319	0.25762	0.04657967032967032	0.5890204241054307	1.331803589534951	0.6959900878576256
AATF	26574	0.047772	0.12839285714285717	1.3208265763682772	0.8914591366233178	0.6958774498760982
CAMK2B	816	0.045067	0.12945054945054946	1.3461413508886326	0.8878961018700108	0.6955958549222798
LRFN2	57497	0.0068175	0.14337912087912089	2.1663748533863325	0.8435140867935955	0.6955395359315161
TUBB6	84617	0.066003	0.12239010989010989	1.1804363242485008	0.9122536752761624	0.6954832169407524
CDC42EP3	10602	0.063066	0.1231868131868132	1.2002047135289133	0.9094357797261204	0.6954268979499887
XKR4	114786	0.063375	0.1231043956043956	1.1980820276586075	0.9097264397360127	0.6954268979499887
PPP1R14C	81706	0.13249	0.10034340659340657	0.8778168999061318	0.9985111590427217	0.6953142599684614
HTRA2	27429	0.16971	0.0852197802197802	0.7702925665399284	1.0694595901714699	0.6951453029961703
MYO1G	64005	0.084674	0.11660714285714284	1.0722499236711844	0.9332748457311265	0.6951453029961703
GNB1	2782	0.17444	0.08361263736263735	0.7583539219986112	1.0777280775600289	0.6949200270331156
CCM2	83605	0.26089	0.04537087912087912	0.5835425672319035	1.3432228056216229	0.6949200270331156
GABBR2	9568	0.25572	0.048365384615384616	0.5922353042381732	1.315465354242853	0.6949200270331156
HOXA10	3206	0.060505	0.1246703296703297	1.2182087347246517	0.9042368921001387	0.6947510700608245
AGPAT1	10554	0.083538	0.11717032967032967	1.0781159264776639	0.9311823481455141	0.6946384320792971
IFT140	9742	0.051051	0.1278846153846154	1.291995746422745	0.8931816983316945	0.6944694751070061
ZNF200	7752	0.012538	0.14149725274725275	1.90177173449706	0.8492519921417474	0.6943568371254787
ADARB1	104	0.28082	0.03493131868131868	0.5515719649883641	1.4567850191373284	0.6941878801531877
ATRN	8455	0.094306	0.11418956043956041	1.0254606754069269	0.9423735988111431	0.6941315611624239
IL17RA	23765	0.27267	0.0400412087912088	0.5643626418572965	1.3974928202180041	0.6941315611624239
LMAN2L	81562	0.16097	0.09002747252747252	0.7932550559462526	1.0456249422666801	0.6939626041901329
RANGAP1	5905	0.24364	0.05526098901098901	0.6132514091706164	1.2575813467417758	0.6937373282270781
WDTC1	23038	0.26979	0.04155219780219781	0.5689741518668779	1.3814060003245494	0.6936246902455508
LRP11	84918	0.26414	0.04447802197802196	0.5781658264952215	1.3518545348956825	0.6935120522640235
AK8	158067	0.011007	0.14296703296703303	1.9583310335243898	0.8447640957595072	0.6930051813471503
SIRT5	23408	0.14657	0.09644230769230769	0.8339549121487747	1.0157324062783624	0.6929488623563865
PABPN1	8106	0.27317	0.040590659340659335	0.5635669973399027	1.3915738940957632	0.6927799053840955
ULK4	54986	0.25013	0.05299450549450548	0.6018342168936395	1.2757691560051716	0.6926672674025681
PROCR	10544	0.062975	0.12490384615384613	1.2008318238298494	0.9034241882257525	0.6926672674025681
OXSR1	9943	0.29582	0.02927197802197802	0.5289724672694486	1.5335479295988352	0.6925546294210407
C17orf67	339210	0.097137	0.11391483516483518	1.0126153135000504	0.9434197139307159	0.6925546294210407
WDR37	22884	0.27754	0.038928571428571423	0.5566744160462552	1.4097315334015956	0.6913719306150033
GMIP	51291	0.30806	0.02162087912087912	0.5113646889178702	1.6651266512899914	0.6913156116242397
TECPR2	9895	0.034501	0.1355906593406593	1.4621683168633084	0.8677702274050363	0.6905834647443118
EIF4E2	9470	0.098098	0.11451923076923078	1.0083398468281866	0.9411215778160028	0.690358188781257
CROCC	9696	0.099666	0.11413461538461535	1.0014529713847604	0.9425826203441893	0.6903018697904933
CD300C	10871	0.30371	0.025096153846153848	0.5175409082025119	1.6003928319604994	0.6900765938274386
CARD10	29775	8.8676e-4	0.14936813186813186	3.052193905285869	0.8257420506473453	0.6900765938274386
IFT20	90410	0.013406	0.14355769230769228	1.8727007849422925	0.8429735315737551	0.6898513178643839
E2F4	1874	0.16274	0.09171703296703297	0.7885056883404051	1.0375500030795546	0.6894570849290381
ELAVL3	1995	0.14453	0.09927197802197799	0.8400419973214811	1.0031733245950316	0.6891754899752196
CCDC6	8030	0.32525	0.012239010989010991	0.48778269476637615	1.9122536752761623	0.689119170984456
CDNF	441549	0.0015749	0.14936813186813183	2.80274701700261	0.8257420506473453	0.6889502140121649
MAMDC4	158056	0.015295	0.14336538461538462	1.8154505186793026	0.8435556958457858	0.6888938950214012
NOX4	50507	0.064142	0.1267857142857143	1.192857502539446	0.8969296782871251	0.6885559810768191
SP1	6667	0.16301	0.09221153846153848	0.7877857525800587	1.0352147321281167	0.6885559810768191
C3orf22	152065	0.019383	0.14249999999999996	1.7125790042401687	0.8461851356554712	0.6884433430952918
NSMCE1	197370	0.055467	0.1296565934065934	1.2559653228299996	0.8872053932232747	0.688387024104528
TRPM5	29850	0.20744	0.07512362637362635	0.6831074962387049	1.1242234559383986	0.6883307051137644
PLA2G4C	8605	0.24142	0.05954670329670328	0.6172267544132977	1.2251422775008083	0.688049110159946
HDAC4	9759	0.29763	0.030741758241758246	0.5263232956469722	1.512271297120706	0.6879364721784186
RGS17	26575	0.031606	0.13807692307692307	1.5002304642316027	0.8598788993924988	0.6878801531876548
CNTFR	1271	0.076926	0.12287087912087914	1.1139268494300771	0.9105510344096454	0.6877111962153638
TESMIN	9633	0.097923	0.11589285714285714	1.0091152898115887	0.9359433302058312	0.6875985582338364
ZNF746	155061	0.16564	0.09182692307692303	0.7808347781696595	1.0370299677150343	0.6874296012615454
AP4S1	11154	0.060194	0.12854395604395608	1.220446796063696	0.8909483384568756	0.687148006307727
TBC1D16	125058	0.32779	0.011936813186813187	0.48440429973154836	1.9231116028643707	0.687148006307727
PANK2	80025	0.16328	0.09314560439560439	0.7870670082919858	1.0308376349360275	0.687148006307727
RIMS1	22999	0.16563	0.09199175824175822	0.7808609981401993	1.0362510803768579	0.6870353683261996
SIX2	10736	0.24808	0.057733516483516496	0.60540824677073	1.2385719893076002	0.6865284974093264
RTN4R	65078	0.23366	0.06480769230769233	0.6314156276425152	1.1883734427634605	0.686246902455508
PPOX	5498	0.3266	0.01355769230769231	0.48598381959935066	1.8678142266434004	0.686077945483217
ONECUT1	3175	0.18178	0.08592032967032968	0.7404539009129777	1.0659040652835983	0.6859653075016896
FLRT2	23768	0.032637	0.13861263736263738	1.4862897685249332	0.8581971731393288	0.6859089885109259
ST3GAL1	6482	0.12382	0.10898351648351647	0.9072092003231139	0.9626391831749055	0.6858526695201622
MFSD3	113655	0.34314	0.0017170329670329661	0.46452865306968405	2.765221366304981	0.6858526695201622
DHRS1	115817	0.27716	0.04229395604395605	0.5572694473386286	1.373721690409839	0.6857400315386348
TMSB10	9168	0.21791	0.0727197802197802	0.661722839303228	1.1383474423477078	0.6856273935571074
DRD1	1812	0.10014	0.11603021978021975	0.9993924129371097	0.9354288851303924	0.6855710745663438
SPRED3	399473	0.0072977	0.14824175824175823	2.1368139939478756	0.8290294426491894	0.6854584365848164
NFKBIB	4793	0.32988	0.011950549450549451	0.48164401410890667	1.9226121266944187	0.6852894796125254
TAF2	6873	0.042127	0.13586538461538464	1.3754394672874861	0.8668911774502217	0.6850642036494706
TSNAX	7257	0.27638	0.04311813186813186	0.5584933875058853	1.3653400636129949	0.6848952466771795
TCEA2	6919	0.32237	0.01693681318681318	0.49164538076482217	1.7711683027173057	0.6848389276864159
NDUFA11	126328	0.30591	0.02770604395604396	0.5144063259776154	1.5574254811002717	0.6846136517233611
ATP6V0C	527	0.34318	0.0025824175824175834	0.4644780300970305	2.587973530049357	0.6845573327325974
ATP1B2	482	0.15359	0.09800824175824173	0.813637059605269	1.0087374018623716	0.6845010137418337
GNAI1	2770	0.24439	0.06060439560439563	0.6119165686163516	1.217495875544884	0.6844446947510701
UBE2E3	10477	0.040268	0.13678571428571432	1.3950399400606501	0.8639592573735964	0.684275737778779
IPO4	79711	0.26279	0.05197802197802197	0.580391165091897	1.284180251583282	0.684275737778779
TRIM44	54765	0.19576	0.08181318681318683	0.7082760436562673	1.0871766902328985	0.6841630997972517
CCDC40	55036	0.049004	0.13410714285714287	1.3097684688076854	0.872548090002032	0.6841067808064879
METTL2A	339175	0.13672	0.10517857142857145	0.8641679502873195	0.9780727322190986	0.6837125478711421
GATA2	2624	0.29434	0.035343406593406596	0.5311507144588871	1.4516915931026906	0.6835999098896148
GZF1	64412	0.31418	0.022678571428571423	0.5028214646368934	1.6443843060502437	0.6835999098896148
RAPGEF4	11069	0.29937	0.031771978021978016	0.5237917226544492	1.4979557465424178	0.6835435908988511
CDK19	23097	0.12548	0.10967032967032968	0.9014254899742925	0.9599108510337224	0.6834309529173237
CTSD	1509	0.29721	0.03331043956043957	0.526936582287787	1.4774196363747547	0.6834309529173237
PYGL	5836	0.1473	0.10115384615384619	0.8317972531573691	0.99501759948105994	0.6833183149357963
C3	718	0.15699	0.09754120879120881	0.8041280105406723	1.010811866664292	0.6831493579635053
STARD4	134429	0.27394	0.046277472527472545	0.5623445485750872	1.3346303683319167	0.6826424870466321
MROH1	727957	0.026766	0.1422527472527473	1.5724165263747396	0.8469393375502026	0.6825298490651047
SAMD4A	23034	0.15807	0.09767857142857143	0.8011505467075494	1.0102007006727696	0.6823608920928137
ZNF556	80032	0.088858	0.12129120879120879	1.0513034660078056	0.9161706757354686	0.6822482541112863
PCDHAC1	56135	0.16266	0.09597527472527471	0.7887192320358708	1.017840636058694	0.6820792971389953
CDH2	1000	0.046688	0.13640109890109897	1.3307947297866425	0.8651821308176558	0.6820229781482315
MAT2A	4144	0.31024	0.02633241758241758	0.5083022082653698	1.5795092664349746	0.6819103401667043
TSPAN32	10077	0.1822	0.08859890109890109	0.7394516273630205	1.0525716646777694	0.6814597882405947
MED22	6837	0.28071	0.042637362637362626	0.5517421158035314	1.3702096667268864	0.6813471502590673
FOXO1	2308	0.092863	0.12054945054945056	1.0321572902757006	0.9188347647463825	0.68123451227754
RHBDD3	25807	0.17473	0.09129120879120883	0.757632523088562	1.0395710423703448	0.6808965983329579
SNRPA	6626	0.17939	0.08990384615384617	0.7462017701317504	1.0462217284262625	0.6805586843883757
SHANK3	85358	0.33032	0.015247252747252747	0.4810651301333543	1.8168084005263798	0.6804460464068484
HIP1	3092	0.015843	0.1475686813186813	1.8001625777918429	0.8310058035814718	0.680333408425321
B3GNT2	10678	0.13726	0.10717032967032968	0.8624560054453474	0.9699254333372646	0.68016445145303
OXLD1	339229	0.20293	0.08145604395604396	0.6926537446307457	1.0890766859487746	0.6801081324622663
ANKRD18A	253650	0.10001	0.11853021978021977	0.9999565727231373	0.9261709103238708	0.6800518134715026
SPSB2	84727	0.22499	0.07259615384615387	0.6478367842945565	1.139086387669592	0.6800518134715026
MEPCE	56257	0.14519	0.10429945054945056	0.8380632947542194	0.9817179794351205	0.6799391754899752
WDR33	55339	0.091634	0.1216346153846154	1.0379433552333996	0.9149428137869436	0.6796575805361568
APRT	353	0.22361	0.0731868131868132	0.6505087783897835	1.1355671631507924	0.6795449425546294
BARX2	8538	0.28728	0.04097527472527472	0.5416946078819833	1.3874781259509745	0.6791507096192836
BCO2	83875	0.06723	0.1307967032967033	1.1724368887452763	0.8834032021745454	0.6787001576931742
BLVRB	645	0.12839	0.11152472527472532	0.8914688011421312	0.9526288379076215	0.6785312007208831
MEF2D	4209	0.302	0.033324175824175836	0.5199930570428494	1.4772405827824828	0.678362243748592
ATP2A1	487	0.12421	0.11274725274725275	0.9058434382174767	0.9478940315452962	0.6781369677855373
CPNE6	9362	0.14925	0.10355769230769231	0.8260856601985933	0.9848176360007987	0.6780806487947736
TPRN	286262	0.1022	0.11892857142857141	0.990549104201306	0.9247137978358995	0.67802432980401
RNF220	55182	0.25093	0.061689560439560434	0.6004474133940653	1.2097883242503225	0.6777427348501914
MANBA	4126	0.2466	0.06354395604395607	0.6080069277402871	1.1969257508784363	0.6777427348501914
AEBP2	121536	0.013624	0.15013736263736271	1.8656953650454553	0.8235112173633342	0.6775737778779004
DGAT1	8694	0.27029	0.05179945054945055	0.5681700217269374	1.285674846907417	0.677461139896373
NFE2L2	4780	0.33233	0.016373626373626375	0.47843045244271004	1.7858551239088196	0.677292182924082
ARL8B	55207	0.27302	0.05064560439560439	0.5638055376790639	1.2954582417069207	0.677292182924082
NUMA1	4926	0.29041	0.04081043956043957	0.5369884331852858	1.389228727509373	0.6772358639333184
TAOK1	57551	0.11303	0.11596153846153846	0.9468062723991303	0.9356860314946478	0.6770105879702636
ZNF786	136051	0.014777	0.15043956043956044	1.8304137266780869	0.8226379441871036	0.676560036044154
FBRSL1	57666	0.35345	0.0020329670329670324	0.45167201400268225	2.69186966391808	0.676560036044154
SZRD1	26099	0.35318	0.0023351648351648355	0.4520038977772754	2.631682457934763	0.6762784410903356
SENP3	26168	0.27956	0.04696428571428571	0.5535249681982132	1.3282322785164427	0.6762784410903356
SLCO2A1	6578	0.22712	0.0735714285714286	0.6437446204821993	1.1332908109730657	0.6760531651272809
ZC3H18	124245	0.27985	0.04700549450549452	0.5530746887572514	1.3278513741079556	0.6760531651272809
MAVS	57506	0.22186	0.07557692307692312	0.6539209913470577	1.1216107932593722	0.6759968461365172
ENPP4	22875	0.22994	0.07298076923076924	0.638385472975154	1.1367915634033	0.6759405271457536
SDC4	6385	0.26505	0.05626373626373626	0.5766721914375547	1.2497714313452628	0.6758842081549898
ZKSCAN2	342357	0.26708	0.05508241758241758	0.573358632438555	1.2589870066928548	0.6757152511826988
NPAS3	64067	0.21798	0.07781593406593405	0.6615833517536417	1.1089314651136213	0.6756026132011714
EXOC7	23265	0.31732	0.02674450549450549	0.49850255438586005	1.5727654277930057	0.6756026132011714
SLC35G5	83650	0.048755	0.13905219780219777	1.3119808392257608	0.8568221424645207	0.675321018247353
ARRDC1	92714	0.35687	4.258241758241754e-4	0.4474899591389632	3.370769685478765	0.6752646992565893
FUCA1	2517	0.011456	0.1521565934065934	1.9409669950362196	0.8177092236011941	0.6752083802658256
KDR	3791	0.051984	0.13802197802197805	1.2841303059990925	0.8600517529199162	0.6752083802658256
USP12	219333	0.3536	0.003186813186813185	0.4514877436589645	2.496643394422138	0.6750957422842983
MIIP	60672	0.31803	0.026524725274725283	0.4975319107705105	1.5763491055336423	0.6748141473304798
CHCHD4	131474	0.32522	0.022692307692307685	0.4878227545215265	1.644121336328674	0.674419914395134
CEACAM7	1087	0.067336	0.13320054945054943	1.1717526858321579	0.8754939837028833	0.6741946384320793
IRF2	3660	0.082803	0.12803571428571425	1.0819539281928576	0.8926688713384004	0.6740256814597883
TNNI2	7136	0.035009	0.14373626373626375	1.4558202942816527	0.8424336483328451	0.6739693624690245
DNPH1	10591	0.050962	0.13907967032967036	1.2927535364827585	0.8567363474263309	0.6738004054967335
METTL8	79828	0.048377	0.13971153846153844	1.3153610670167744	0.8547677250007589	0.6737440865059698
JARID2	3720	0.22196	0.07690934065934064	0.6537252838578718	1.1140209118180535	0.6737440865059698
LOXL3	84695	0.26582	0.05715659340659342	0.5754123463320695	1.2429336635200898	0.6736877675152061
SELENOK	58515	0.0066097	0.15471153846153848	2.179818251755098	0.8104772951997508	0.6736877675152061
ATP5F1C	509	0.052838	0.13839285714285712	1.2770536294640644	0.8588863244998902	0.6736877675152061
RIT1	6016	0.048323	0.1398489010989011	1.3158461115764546	0.8543409418670586	0.6735751295336787
SCFD1	23256	0.21196	0.08097527472527472	0.673746089157708	1.0916475698819292	0.6735188105429151
CHST11	50515	0.18222	0.09392857142857144	0.7394039576980912	1.0272022828524612	0.6727303446722235
PMF1	11243	0.31246	0.031071428571428576	0.5052055715716336	1.5076387787236005	0.6726740256814598
SEPTIN8	23176	0.091788	0.12541208791208788	1.0372140930300828	0.9016606017787383	0.6726177066906961
TXNDC5	81567	0.14167	0.10960164835164833	0.8487221060958772	0.9601829142399533	0.6726177066906961
HOXA7	3204	0.17727	0.09553571428571428	0.751364755300671	1.019834244984972	0.6725613876999325
AMH	268	0.15192	0.1053434065934066	0.8183850482710389	0.9773926415434053	0.6725050687091687
MUC4	4585	6.5519e-4	0.15773351648351647	3.18363273972438	0.8020760144881924	0.6723361117368777
NPIPA1	9284	0.15895	0.10296703296703301	0.7987394677492082	0.9873018014333151	0.6722797927461139
TMEM41A	90407	0.025103	0.14814560439560442	1.6002743739137686	0.8293112298744733	0.6721671547645867
ESRP1	54845	0.28831	0.044491758241758245	0.5401402938951745	1.3517204313028601	0.6720545167830593
ZBTB20	26137	0.053049	0.1391895604395604	1.2753227983521827	0.8563933366616124	0.6719981977922955
TFEB	7942	0.31274	0.031249999999999997	0.50481656817092	1.505149978319906	0.6719981977922955
AQP12B	653437	0.22958	0.07502747252747252	0.6390659484516135	1.1247796835093227	0.6718855598107681
AGER	177	0.068507	0.13456043956043953	1.16426505031703	0.8710826028603608	0.6717729218292409
CD46	4179	0.3229	0.02589285714285715	0.4909319549828383	1.5868200247712254	0.6716602838477135
AAAS	8086	0.20892	0.08320054945054947	0.680019982835044	1.0798738056497355	0.6716602838477135
ITGA11	22801	0.24437999999999999	0.06887362637362636	0.6119343395303587	1.1619470496908395	0.6714913268754223
BUD31	8896	0.33185	0.02074175824175824	0.4790581780219384	1.6831544320198677	0.6712660509123677
CHMP1B	57132	0.13808	0.11190934065934063	0.8598692216288656	0.9511336630023944	0.6712097319216039
ZNF687	57592	0.0088831	0.1550412087912088	2.051435448866639	0.8095528542683792	0.6710407749493129
PPT2	9374	0.14251	0.11027472527472529	0.8461546599190349	0.9575240154975891	0.6709844559585493
ARAP1	116985	0.26982	0.056758241758241734	0.5689258620484144	1.2459710664654544	0.6709844559585493
B4GALT1	2683	0.30804	0.034436813186813194	0.5113928852809319	1.4629770453548205	0.6707028610047308
MRPL36	64979	0.21777	0.080782967032967	0.6620019488770398	1.0926801999109996	0.6704775850416761
CASTOR3	352954	0.33373	0.02050824175824178	0.4766047515446712	1.6880715715880112	0.6703649470601487
DCUN1D1	54165	0.33427	0.02039835164835165	0.4759025986365498	1.690404925659806	0.6699707141248029
PPARG	5468	0.085239	0.12960164835164836	1.0693616539487953	0.887389474812087	0.6698017571525118
NUDT14	256281	0.02494	0.14998626373626373	1.6031035508574762	0.8239485133223771	0.6695201621986934
C3orf18	51161	0.078721	0.13195054945054946	1.1039093976594962	0.8795887970100937	0.669407524217166
SPRYD7	57213	0.082079	0.13072802197802197	1.0857679433765997	0.883631310001578	0.6692948862356387
ADAMTSL3	57188	0.072232	0.13457417582417583	1.1412703599848044	0.8710382712641498	0.6690132912818202
ANAPC2	29882	0.10028	0.12435439560439564	0.9987856747138211	0.9053388589425422	0.6689006533002929
BCR	613	0.34929	0.011497252747252747	0.4568138478206602	1.9394059213197772	0.6688443343095292
TMEM203	94107	0.098105	0.12520604395604398	1.0083088578894384	0.902374706322042	0.6687316963280018
PARP14	54625	0.027633	0.14902472527472527	1.558571962976401	0.8267416701143602	0.6686753773372381
CATSPERD	257062	0.20254	0.08747252747252744	0.6934891943566176	1.0581283245834248	0.6686753773372381
NCDN	23154	0.13975	0.11254120879120877	0.854648183441539	0.9486884244536415	0.6685627393557108
UBE2L3	7332	0.22379	0.07938186813186811	0.6501593237140553	1.1002786848466541	0.6685627393557108
IKZF4	64375	0.006947	0.1566346153846154	2.158202701125645	0.805112254990271	0.6683937823834197
MED31	51003	0.11019	0.12092032967032973	0.9578578169350438	0.9175006774567588	0.6683937823834197
ATP6V1A	523	0.016811	0.15373626373626376	1.7744064518452005	0.813223677829266	0.6682248254111286
EIF1AD	84285	0.25235	0.06767857142857142	0.5979966909302953	1.169548817038128	0.6676616355034918
ANKRD12	23253	0.22922	0.07765109890109888	0.6397474918063292	1.1098523938529186	0.6676053165127281
ARF6	382	0.25481	0.06674450549450552	0.5937835321467396	1.1755844802500308	0.6675489975219644
HECW2	57520	0.28391	0.05059065934065934	0.5468193102979061	1.2959296604581243	0.6673800405496734
GSTZ1	2954	0.02727	0.1503434065934066	1.5643148620583702	0.8229156134090867	0.6670421266050912
RGS10	6001	0.14504	0.11166208791208788	0.8385122089125477	0.9520942557599865	0.6669294886235638
IL4R	3566	0.079063	0.13321428571428576	1.102026710626405	0.8754491995335315	0.6665915746789818
WFS1	7466	0.15939	0.10597527472527474	0.7975389293706003	0.97479544891387	0.6664789366974544
RCN1	5954	0.35933	0.00629120879120879	0.44450652259339773	2.201265901309168	0.6664789366974544
NXF1	10482	0.28293	0.05182692307692307	0.5483210004267576	1.2854445741120417	0.6664789366974544
CCDC38	120935	0.27399	0.057843406593406595	0.5622652876324288	1.237746137892772	0.6660847037621086
GFER	2671	0.26866	0.06061813186813188	0.5707969895862904	1.2173974518658446	0.6654088758729444
CHCHD1	118487	0.20509	0.08829670329670332	0.6880555149153798	1.0540555112217302	0.665296237891417
OPRM1	4988	0.22432	0.08083791208791208	0.6491320037134354	1.0923849121335838	0.6651835999098896
CTNNBIP1	56998	0.24877	0.07126373626373626	0.6042019938366077	1.1471314119009948	0.6650709619283622
NT5E	4907	0.033853	0.14875	1.4704028387745753	0.8275430255994128	0.6650709619283622
TMEM33	55161	1.6765e-5	0.16155219780219776	4.7755964422351616	0.7916871293400903	0.6648456859653075
RAB35	11021	0.26614	0.061936813186813204	0.5748898474563189	1.2080511440064665	0.6647893669745438
SLC66A2	80148	0.34472	0.017307692307692312	0.46253351891968864	1.7617608341954742	0.6647330479837801
SSR2	6746	0.094048	0.12917582417582416	1.0266504356074815	0.8888187588601355	0.6646767289930164
PLBD1	79887	0.21076	0.08585164835164834	0.6762118100992494	1.066251361968962	0.6646204100022528
CIDEB	27141	0.24232	0.0734065934065934	0.6156107396752006	1.134264929845548	0.66456409101148906
MRPL10	124995	0.14217	0.11342032967032967	0.8471920365809364	0.9453090947171252	0.6645077720207254
NMUR1	10316	0.10029	0.12692307692307694	0.998742368687769	0.8964594080929305	0.6644514530299617
PAX8	7849	0.095421	0.1285302197802198	1.0203560364020536	0.890994749836231	0.664395134039198
ZSCAN1	284312	0.1454	0.11269230769230772	0.8374355934769809	0.9481057276167084	0.6643388150484343
CDH4	1002	0.16046	0.10670329670329673	0.7946332121335238	0.9718221624130886	0.6643388150484343
FAM217B	63939	0.17143	0.10181318681318682	0.7659131748610291	0.9921959686661772	0.6642824960576706
DGAT2	84649	0.026334	0.15228021978021977	1.579483168771383	0.8173565050565947	0.6641135390853796
OGFR	11054	0.36419	0.004285714285714286	0.4386719833199104	2.3679767852945943	0.6640572200946159
CTSE	1510	0.11727	0.1207142857142857	0.9308130748480904	0.9182413310645645	0.6640009011038522
MCAT	27349	0.3094	0.03811813186813187	0.5094796906366512	1.418868391854342	0.6638319441315612
CSF1R	1436	0.2157	0.08464285714285716	0.6661498548974549	1.0724096853321152	0.6637756251407975
GPANK1	7918	0.31782	0.033447802197802204	0.4978187766807587	1.475632413762384	0.6636066681685064
NAPB	63908	0.33295	0.025796703296703298	0.4776209807714366	1.588435791382945	0.6636066681685064
OSBPL6	114880	0.1034	0.12663461538461543	0.9854794612420763	0.8974475643369964	0.6634377111962154
BYSL	705	0.16397	0.10597527472527477	0.7852356033319614	0.9747954489138699	0.6634377111962154
TBC1D29P	26083	0.14435	0.11332417582417587	0.8405832117832607	0.945677430763112	0.6634377111962154
HOMER2	9455	0.33208	0.02655219780219781	0.478757279629537	1.575899525284484	0.6632124352331606
ZBTB45	84878	0.35881	0.009601648351648354	0.4451354617140666	2.0176542035673557	0.6629871592701059
UBA52	7311	0.29672	0.04657967032967033	0.5276531796794462	1.331803589534951	0.6629308402793422
NOS3	4846	0.20982	0.08745879120879123	0.6781531173071116	1.0581965294491953	0.6628182022978149
LCTL	197021	0.29693	0.046758241758241774	0.5273459217159868	1.3301418279004869	0.6625929263347601
PKD1	5310	0.24887	0.07284340659340657	0.6040274522050069	1.1376097521944746	0.6623113313809417
DGKZ	8525	0.16333	0.1073489010989011	0.7869340379342822	0.9692023969578314	0.6614665465194863
GSE1	23199	0.32527	0.03134615384615386	0.4877559903156573	1.503815739230841	0.6614665465194863
NLRP12	91662	0.024247	0.15432692307692306	1.615341987537721	0.8115583025578895	0.6614665465194863
MRTO4	51154	0.076526	0.137445054945055	1.1161909865702968	0.8618708807656467	0.661353908537959
PHTF1	10745	0.026917	0.1534752747252747	1.5699733454899858	0.8139615805470196	0.6612412705564317
DPH7	92715	0.35397	0.014079670329670333	0.4510335441509284	1.851407513921264	0.6611286325749043
CHST12	55501	0.25403	0.07148351648351647	0.5951149917851867	1.1457940914234885	0.6610723135841405
NOCT	25819	0.037188	0.15038461538461537	1.4295971777130922	0.8227965905749512	0.6610159945933769
GCHFR	2644	4.2228e-4	0.1629807692307693	3.3743994871171834	0.7878636367596792	0.6609596756026132
CACNA1C	775	0.20711	0.0902747252747253	0.6837989313336309	1.0444338245500129	0.6609033566118495
SETD5	55209	0.31283	0.03798076923076922	0.504691605325384	1.4204362436723201	0.6608470376210859
RPS6	6194	0.27788	0.058791208791208804	0.5561427097976823	1.230687610299865	0.6605654426672674
TAX1BP3	30851	0.24228	0.07585164835164836	0.6156824350087359	1.1200349770097928	0.6605091236765037
MIA	8190	0.059178	0.14317307692307693	1.227839716492743	0.8441386415466042	0.6605091236765037
KRT8	3856	0.015231	0.1577335164835165	1.8172715818757326	0.8020760144881923	0.660283847713449
SETX	23064	0.086751	0.13436813186813185	1.0617255102894947	0.8717037208277737	0.6602275287226853
EIF3M	10480	0.11919	0.12259615384615385	0.9237601802249746	0.9115231545288064	0.6599459337688669
CRISPLD2	83716	0.17264	0.10427197802197802	0.7628585726611645	0.9818323878872847	0.6599459337688669
LRRC42	115353	0.26295	0.06748626373626375	0.5801268248505238	1.1707846151782153	0.6598896147781032
PITPNB	23760	0.29483	0.050480769230769225	0.5304283275580014	1.2968740358928235	0.6597206578058121
RHBDD2	57414	0.1666	0.10692307692307695	0.7783250029292312	0.9709285520527415	0.6596643388150484
C2orf50	130813	0.15283	0.11225274725274728	0.8157913868884973	0.9498030213526271	0.6596080198242847
ZC3HAV1	56829	0.25302	0.07287087912087913	0.5968451486014928	1.1374459910756778	0.6596080198242847
PCDHGC3	5098	0.14118	0.11594780219780218	0.8502268224403351	0.935737479043355	0.6594390628519937
HIC1	3090	0.19071	0.09784340659340658	0.7196265338498806	1.009468434968468	0.6593264248704663
SETDB1	9869	0.22613	0.08309065934065933	0.6456418172646785	1.0804477948056865	0.6592701058797026
ASPH	444	0.28454	0.056153846153846144	0.5458566728254096	1.250620492186381	0.6589321919351205
AHCYL1	10768	0.096911	0.13096153846153846	1.0136269250321293	0.882856231722014	0.6588758729443568
COX4I1	1327	0.34018	0.024505494505494517	0.46829122318954397	1.6107365292729328	0.6588758729443568
HARS2	23438	0.35592	0.014574175824175825	0.44864760726001196	1.8364159954116965	0.6588195539535932
GABRD	2563	0.10831	0.12725274725274727	0.9653314441657593	0.8953328329296761	0.6587069159720658
TIFA	92610	0.33761	0.02644230769230769	0.4715846980638605	1.5777006454685178	0.6586505969813021
PXDC1	221749	0.25818	0.07093406593406595	0.5880774035338008	1.1491451457186543	0.6585379589997747
TWIST1	7291	0.074253	0.13976648351648355	1.1292859951134364	0.8545969614157795	0.658481640009011
DNAJB9	4189	0.047636	0.14804945054945054	1.3220647134122048	0.8295932000530306	0.6582000450551926
CDC42EP5	148170	0.23698	0.07986263736263735	0.6252883048597354	1.0976563518786282	0.658143726064429
RFX1	5989	0.31106	0.040673076923076916	0.5071558323376771	1.3906929719237382	0.6580310880829016
FHDC1	85462	0.23106	0.08230769230769228	0.6362752309936253	1.0845595746216272	0.6579184501013742
PRR13	54458	0.29093	0.0541620879120879	0.5362114930441645	1.2663046022398141	0.6579184501013742
HAAO	23498	0.071393	0.14087912087912086	1.1463443682014962	0.851153367138295	0.6578621311106105
KMT5A	387893	0.27213	0.06392857142857142	0.5652235783368463	1.1943050003623261	0.6578621311106105
TRIOBP	11078	0.36403	0.009793956043956047	0.4388628243246141	2.0090418494611715	0.6576931741383194
NEUROG1	4762	0.19094	0.09870879120879122	0.719103081771116	1.0056441664444065	0.6573552601937374
FBXO7	25793	0.03644	0.15254120879120878	1.4384216316990392	0.8166128164285444	0.6573552601937374
LRP3	4037	0.32059	0.036002747252747255	0.4940500284963842	1.4436643583664366	0.6571863032214462
ELL2	22936	0.0021761	0.16364010989010988	2.6623211510463296	0.7861102375294918	0.6571299842306826
CDK18	5129	0.25348	0.07395604395604394	0.596056301546798	1.131026328097117	0.6570173462491552
SEC24A	10802	0.0063264	0.1621840659340659	2.198843352366422	0.789991816073297	0.656510475332282
NUBP1	4682	0.22429	0.08524725274725276	0.649190089063635	1.0693196080648901	0.6562288803784636
KAZN	23254	0.19366	0.09866758241758246	0.7129600724827576	1.005825512879738	0.6560036044154088
HLA-E	3133	0.35872	0.015233516483516483	0.4452444090851209	1.8171998331638772	0.6558346474431178
PIGZ	80235	0.27088	0.0659478021978022	0.5672230592351399	1.1807996733438715	0.6555530524892994
WDR81	124997	0.37035	0.006785714285714287	0.43138765101238646	2.16840443038939	0.655440414507772
EFNB2	1948	0.37579	0.0022527472527472526	0.4250547809215036	2.6472875312653392	0.655271457535481
EPS8L1	54869	0.19445	0.09881868131868132	0.7111920525165214	1.0051609458305448	0.6551588195539536
SLC35C2	51006	0.22859	0.084478021978022	0.6409427723651109	1.0732562635376204	0.6551588195539536
TMEM106B	54664	0.084563	0.13828296703296705	1.072819618175387	0.8592313107016497	0.6549335435908988
PRPF8	10594	0.35472	0.018557692307692313	0.4501143242295871	1.7314760302910064	0.6548209056093715
RNMT	8731	0.25223	0.07586538461538461	0.5982032601118361	1.11995633608936	0.6546519486370804
IER5	51278	4.9449e-4	0.16600274725274727	3.305842486652711	0.779884724569368	0.6545956296463168
PICK1	9463	0.30777	0.044450549450549444	0.5117737154643576	1.3521228663728027	0.6545956296463168
YDJC	150223	0.33963	0.028173076923076922	0.4689939548856455	1.550165718944671	0.6544266726740257
NUBPL	80224	0.034611	0.15427197802197803	1.4607858526501685	0.8117129520679018	0.654370353683262
C22orf24	25775	0.13296	0.12085164835164836	0.8762789935599642	0.917747421672193	0.654201396710971
PDHX	8050	0.14811	0.11627747252747253	0.8294156180608064	0.9345044168680832	0.6538634827663888
WNT3	7473	0.24569	0.07928571428571429	0.6096125196827211	1.1008050568915806	0.6526807839603515
ENTPD1	953	0.12663	0.12456043956043959	0.8974633931259295	0.9046198678585573	0.6525681459788241
CSGALNACT2	55454	0.23987	0.081552197802197815	0.6200240648673783	1.0885643303869783	0.6523428700157693
TNFSF13	8741	0.25153	0.0774587912087912	0.5994102091867766	1.110929284724684	0.6523428700157693
SLC35E2A	9906	0.22152	0.08874999999999998	0.6545870572624819	1.0518316382728683	0.6519486370804235
AMDHD2	51005	0.25434	0.07646978021978021	0.5945853330481353	1.1165101580060988	0.6519486370804235
SYNGR3	9143	0.20903	0.09480769230769234	0.6797913794417558	1.023156424357569	0.6518923180896599
FLI1	2313	0.12291	0.12600274725274727	0.9104127813271953	0.8996199858054402	0.6518359990988961
SLC35G2	80723	0.038922	0.15451923076923074	1.4098048516861297	0.8110174625354359	0.6517796801081325
MFRP	83552	0.031548	0.1562087912087912	1.5010281678460125	0.8062945282946327	0.6517233611173687
STOML2	30968	0.26341	0.07285714285714287	0.5793677416658789	1.1375278639163204	0.6516670421266051
CRLF3	51379	0.28432	0.060810439560439564	0.5461925895387737	1.2160218573341892	0.6516107231358415
CRIPT	9419	0.23668	0.08311813186813188	0.6258384393950257	1.0803042263806093	0.6515544041450777
VSNL1	7447	0.19147	0.10170329670329673	0.7178992627141524	0.9926649692321706	0.6513291281820229
CDA	978	0.014258	0.16173076923076923	1.845941389623029	0.791207347836887	0.6512164902004957
GRPEL1	80273	0.12103	0.12734890109890112	0.9171069667118206	0.8950047982366244	0.6509348952466771
KIF7	374654	0.068787	0.14550824175824176	1.1624936309757012	0.8371124070302777	0.6508785762559135
CASP2	835	0.33722	0.0318543956043956	0.47208667594510195	1.4968306306750498	0.6505406623113313
NUP214	8021	0.15335	0.11611263736263731	0.8143162196814957	0.9351205103373863	0.6503153863482767
JUNB	3726	0.19791	0.10009615384615385	0.7035322611998848	0.9995826097882442	0.6502590673575129
TBC1D2B	23102	0.27895	0.06517857142857143	0.5544736342536121	1.1858951625497256	0.6501464293759855
NR4A2	4929	0.2755	0.06743131868131867	0.5598783968121961	1.1711383472131678	0.6500901103852219
PIGO	84720	0.31837	0.04156593406593407	0.49706786256844915	1.3812624556258692	0.6499211534129309
TRAF2	7186	0.013462	0.16281593406593406	1.8708904137792728	0.7883030949119285	0.6496958774498761
FUS	2521	0.36774	0.013159340659340667	0.4344591282642463	1.8807658702344925	0.649357963505294
EPHB6	2051	0.29181	0.059258241758241764	0.5348998294048555	1.2272512385465109	0.6491326875422393
BET1	10282	0.18389	0.10653846153846153	0.7354418871996729	0.9724935789063694	0.6490200495607119
LPCAT1	79888	0.29211	0.059203296703296715	0.5344535752740344	1.2276541091523054	0.6489637305699482
MRPL14	64928	0.31167	0.0462912087912088	0.5063049990112143	1.3345014784416984	0.6485131786438387
CORO7	79585	0.3346	0.034423076923076924	0.4754740633736243	1.463150312654906	0.6485131786438387
ASB17	127247	0.072062	0.14559065934065935	1.1422936886898543	0.8368664871585293	0.6481752646992566
PROK2	60675	0.20151	0.09960164835164834	0.6957033969816449	1.0017334741857244	0.6481189457084929
DNAAF5	54919	0.027207	0.15925824175824174	1.565319343382858	0.7978980832782844	0.6481189457084929
TNN	63923	0.091089	0.13953296703296703	1.040534065702539	0.8553231708204583	0.6477247127731471
CHSY3	337876	0.04431	0.15491758241758244	1.353498249968388	0.8098992890607027	0.6477247127731471
TM2D3	80213	0.14842	0.119010989010989	0.8285075727470989	0.9244129356957733	0.6477247127731471
ANKRD36C	400986	0.023324	0.16070054945054946	1.6321969672509933	0.7939826383397434	0.6476120747916198
FST	10468	0.13342	0.12472527472527473	0.8747790636834355	0.904045530791952	0.6476120747916198
FGFR3	2261	0.10355	0.1356868131868132	0.9848498967705286	0.8674623574875078	0.647555755800856
RNF44	22838	0.23169	0.087967032967033	0.635092710441966	1.0556800560657749	0.6474431178193287
TTC31	64427	0.14104	0.1218956043956044	0.8506577007087344	0.9140119549325011	0.647217841856274
MAFF	23764	0.21874	0.09387362637362642	0.6600717922214863	1.027456404850293	0.6467109709394008
ABO	28	0.17443	0.11086538461538459	0.7583788192085761	0.9552040320040814	0.6465983329578734
SF3A2	8175	0.29827	0.05744505494505494	0.5253904257852899	1.2407473508313842	0.6465420139671098
EBI3	10148	0.32512	0.04082417582417582	0.48795631373219356	1.3890825742244994	0.646316738004055
RAB33B	83452	0.25659	0.07876373626373623	0.5907602732512152	1.1036736907025717	0.6462604190132912
RAB30	27314	0.13535	0.12475274725274726	0.8685417398934748	0.9039498817480893	0.6462604190132912
ARHGAP5	394	0.37309	0.011936813186813193	0.42818639127817626	1.9231116028643704	0.6462604190132912
ZNF672	79894	0.069875	0.1476510989010989	1.1556781791055202	0.8307633164272642	0.646147781031764
IFNA5	3442	0.14199	0.1222664835164835	0.8477422408123435	0.9126925782765329	0.646147781031764
MISP	126353	0.11654	0.13070054945054949	0.9335249862458688	0.8837225866899978	0.6460914620410002
EMC8	10328	0.33044	0.03820054945054946	0.48090738650964415	1.4179303904488776	0.6460351430502366
ADAMTS19	171019	0.081122	0.1440521978021978	1.0908613506850917	0.8414801113086954	0.6459225050687092
SNX21	90203	0.26656	0.07417582417582419	0.5742050202733064	1.1297376194900686	0.6458098670871818
C2CD4A	145741	0.14624	0.12098901098901096	0.8349338216102438	0.917254073349342	0.6457535480964182
PHF12	57649	0.34085	0.03274725274725276	0.467436701665525	1.4848251282448381	0.645584591124127
ADK	132	0.031133	0.15945054945054946	1.5067790283483147	0.7973739798833577	0.6454719531425996
SLC25A29	123096	0.14641	0.12112637362637364	0.8344292593670998	0.9167612848227333	0.645415634151836
DUSP1	1843	0.031759	0.1593269230769231	1.4981331807197265	0.7977108308794436	0.6453593151610724
DOC2B	8447	0.22072	0.09346153846153844	0.6561583125288709	1.0293670743725059	0.6451340391980176
PRKAR1A	5573	0.32025	0.04361263736263736	0.4945108615832761	1.3603876496850427	0.6450777202072538
SART1	9092	0.20328	0.10078296703296705	0.6919053479576871	0.9966128602382631	0.6449087632349628
MBTPS1	8720	0.23926	0.08594780219780218	0.6211299016010251	1.065765224335516	0.6446271682811444
CANT1	124583	0.30326	0.05526098901098902	0.5181848693625801	1.2575813467417758	0.6446271682811444
SCUBE2	57758	0.040507	0.1573901098901099	1.3924699200277453	0.8030225613994434	0.6442892543365623
TTC12	54970	0.1992	0.10322802197802199	0.7007106659123201	0.9862023943901101	0.6442892543365623
FAT1	2195	0.1884	0.10777472527472524	0.7249191015431414	0.9674830755195202	0.6439513403919802
RPRD1B	58490	0.010714	0.166771978021978	1.9700483579631594	0.7778769202018081	0.6438387024104528
CHERP	10523	0.072035	0.14815934065934067	1.1424564394917254	0.8292709633608936	0.643613426447398
ZNF502	91392	0.10294	0.13802197802197805	0.9874158360858493	0.8600517529199162	0.6435007884658707
SLC4A2	6522	0.3536	0.02777472527472528	0.4514877436589645	1.5563502280580548	0.643444469475107
AGRP	181	0.20545	0.10078296703296703	0.6872938544021099	0.9966128602382632	0.643275512502816
RNASEH1	246243	0.24437	0.0848489010989011	0.6119521111715643	1.0713537779753435	0.6431065555305249
TCTE3	6991	0.20935	0.09934065934065933	0.6791270347727507	1.0028729618457304	0.6431065555305249
DLL4	54567	0.065989	0.1509203296703297	1.1805284529043198	0.8212522547972503	0.6431065555305249
HSPG2	3339	0.38664	0.0043818681318681316	0.41269321786917595	2.358340696255856	0.6428812795674701
PRR5	55615	0.29645	0.060755494505494514	0.5280485453190175	1.2164144399434333	0.6428812795674701
S100A10	6281	0.28047	0.06903846153846153	0.5521135854995699	1.16090889505648	0.6428249605767065
PALLD	23022	0.28996	0.06402472527472529	0.5376619089198027	1.1936522763804516	0.6427686415859428
AP5M1	55745	0.28112	0.06843406593406594	0.5511082558487803	1.1647276561125495	0.6427686415859428
UCK2	7371	0.11062	0.13559065934065936	0.9561663458668532	0.8677702274050361	0.6427123225951791
ARFGAP1	55738	0.38722	0.00396978021978022	0.41204221937676344	2.4012335365564894	0.6427123225951791
LCN8	138307	0.20918	0.09967032967032968	0.679479841338511	1.0014341052609983	0.6426560036044154
ZNF706	51123	0.0080298	0.16831043956043953	2.0952952716550772	0.7738889458014653	0.6425996846136517
KCTD15	79047	0.30503	0.05534340659340658	0.5156574452639132	1.2569341119246595	0.6425996846136517
BICRAL	23506	0.16163	0.11701923076923078	0.7914780270685668	0.9317427610687153	0.642543365622888
GRK2	156	0.34676	0.031881868131868135	0.45997100572058475	1.4964562388571194	0.642543365622888
INSL3	3640	0.18635	0.10925824175824177	0.7296706029101415	0.9615457926630756	0.6424307276413607
NRG3	10718	0.36369	0.021868131868131864	0.4392686401180271	1.660188315911387	0.6423180896598333
MEA1	4201	0.29609	0.0613186813186813	0.5285762600141336	1.212407193383515	0.6422617706690696
PTGDR2	11251	0.12932	0.1296428571428571	0.8883343040604815	0.8872514063061069	0.6420364947060149
TUSC1	286319	0.28034	0.0696978021978022	0.5523149309950449	1.1567809164273253	0.6419801757152512
VIPR2	7434	0.13809	0.12612637362637366	0.8598377703863633	0.899194090883035	0.6419238567244875
TH	7054	0.18297	0.11074175824175825	0.7376201119226365	0.9556885854960048	0.6419238567244875
CHRNB4	1143	0.24476	0.08524725274725274	0.6112595554753888	1.0693196080648903	0.6419238567244875
STRN4	29888	0.39093	0.001813186813186813	0.4079010004950299	2.741557448107187	0.6418675377337238
SOX15	6665	0.35987	0.024793956043956056	0.44385435611870927	1.6056541730713603	0.641473304798378
PRKAG2	51422	0.15109	0.12184065934065937	0.8207642788015195	0.9142077594813107	0.6408537958999775
ELAC2	60528	0.20506	0.10274725274725274	0.688119046962096	0.9882297814485759	0.6407974769092137
TRIM69	140691	0.11231	0.13600274725274722	0.9495815727548648	0.8664523188014152	0.6406848389276865
ABCC4	10257	0.1923	0.1081730769230769	0.7160207157615202	0.9658808168513991	0.6406285199369227
PRAG1	157285	0.10866	0.1373214285714286	0.9639302993022979	0.8622616872047693	0.6402906059923407
NANP	140838	0.25469	0.08271978021978021	0.5939881065875326	1.0823906281362967	0.6401779680108133
CXCL5	6374	0.17263	0.11468406593406591	0.7628837294649428	0.9404969182593319	0.6400653300292859
FMNL2	114793	0.11123	0.1367032967032967	0.9537780627783636	0.8642210119662938	0.6400090110385221
PAX1	5075	0.22276	0.095782967032967	0.6521627907822786	1.018711714108119	0.6399526920477585
EGFL8	80864	0.10394	0.13971153846153844	0.9832172875131593	0.8547677250007589	0.6396147781031764
EHD4	30844	0.20207	0.10482142857142857	0.6944981585359666	0.979549925758586	0.6395584591124127
RNF168	165918	0.051739	0.15629120879120878	1.2861819694864807	0.8060654498812845	0.639502140121649
LRRC59	55379	0.31734	0.04990384615384617	0.4984751825973719	1.3018659814503224	0.6393895021401217
DRC1	92749	0.19864	0.10646978021978021	0.7019332934534921	0.9727736424241057	0.6393331831493579
SEMA6D	80031	0.23284	0.09265109890109893	0.6329424093871571	1.0331494253051139	0.6391079071863032
RPLP1	6176	0.15292	0.1218956043956044	0.8155357106530094	0.9140119549325011	0.6390515881955395
TOP3A	7156	0.088911	0.14484890109890108	1.0510445051291049	0.839084795237532	0.6389952692047759
TLN1	7094	0.31305	0.05303571428571429	0.5043862918788647	1.275431577688988	0.6389389502140121
SERPINA3	12	0.10347	0.14042582417582417	0.9851855509129468	0.8525530185184951	0.6388263122324848
AGBL4	84871	0.017245	0.16701923076923078	1.7633368012965904	0.7772335208516817	0.6387699932417211
ANKRD27	84079	0.0025714	0.17167582417582417	2.5898303604320025	0.7652908589816477	0.6386573552601937
PTPRK	5796	0.30976	0.0551098901098901	0.5089746643717004	1.2587704549646568	0.6385447172786664
EIF4EBP1	1978	0.051193	0.1570741758241758	1.2907894192821567	0.80389521037027	0.6385447172786664
EIF4A1	1973	0.35773	0.0290521978021978	0.4464446374631945	1.5368210076019762	0.6385447172786664
ABCA7	10347	0.25926	0.08195054945054946	0.5862644833051263	1.0864481302869933	0.638432079297139
MRPS12	6183	0.27649	0.07417582417582416	0.5583205714961914	1.1297376194900688	0.6382068033340843
TCTN3	26123	0.13219	0.13042582417582416	0.8788013974153099	0.884636410240001	0.6379815273710295
MBOAT1	154141	0.050972	0.15770604395604396	1.2926683255652438	0.8021516623688755	0.6375872944356837
ADGRF2	222611	0.038336	0.16103021978021978	1.4163932036268014	0.7930926143269665	0.6375872944356837
KARS1	3735	0.37221	0.019065934065934074	0.4292119630524347	1.7197419131942009	0.6374746564541564
PDPR	55066	0.099895	0.14212912087912088	1.000456248778547	0.847316930225984	0.637362018472629
KDM3B	51780	0.35114	0.032953296703296706	0.45451969520058944	1.4821011313452066	0.6373056994818653
TP53INP2	58476	0.35494	0.030961538461538454	0.44984505503284644	1.5091774676029495	0.6371930615003379
ADAR	103	0.21179	0.10160714285714285	0.6740945496456581	0.9930757606111292	0.6371367425095742
TEX55	152405	0.051338	0.1578159340659341	1.2895610543611593	0.8018491498746911	0.6371367425095742
SLC27A4	10999	0.35842	0.029478021978021976	0.4456077645029502	1.5305016616831049	0.6370241045280468
NANOS2	339345	0.0050268	0.17151098901098905	2.2987083935911556	0.7657080487177665	0.6370241045280468
SIPA1L3	23094	0.10372	0.14123626373626377	0.9841374919026861	0.850053779782022	0.6369677855372832
TNFRSF10D	8793	0.3066	0.05807692307692311	0.5134278494816437	1.2359964006776483	0.6367988285649921
GSN	2934	0.1193	0.13601648351648352	0.9233595563296582	0.8664084573175719	0.6366861905834648
KDELR1	10945	0.39111	0.006909340659340658	0.40770107975408815	2.16056339425711	0.6366861905834648
CAMSAP3	57662	0.22115	0.09806318681318682	0.6553130562943774	1.008493997354443	0.636629871592701
ETV6	2120	0.14937	0.12517857142857142	0.825736619004878	0.9024700090395418	0.6365735526019374
USP21	27005	0.39082	0.007293956043956046	0.40802321960171273	2.137036858231568	0.63646091462041
ELOVL6	79071	0.073008	0.1523076923076923	1.1366295485714144	0.8172781620453057	0.6364045956296464
INMT	11185	0.07737	0.15094780219780218	1.1114274031424	0.8211732059288299	0.636291957648119
ANAPC4	29945	0.32056	0.050027472527472534	0.4940906705753566	1.3007914378541359	0.6361793196665916
ACTR3	10096	0.36616	0.024478021978021985	0.4363291005807569	1.611223679612181	0.6361230006758279
SLC38A7	55238	0.36428	0.025934065934065928	0.43856467209619454	1.5861293893509871	0.6358977247127732
RUNDC3A	10900	0.25551	0.08501373626373628	0.5925920980348179	1.070510896620223	0.635728767740482
COA7	65260	0.093372	0.1452197802197802	1.0297833386370643	0.8379742248533646	0.6355034917774274
LAPTM5	7805	0.28375	0.07229395604395605	0.5470641297988209	1.1408980092957597	0.6353345348051362
PPP6R3	55291	0.26569	0.08093406593406594	0.5756247911920844	1.0918686411424439	0.6351655778328452
ERF	2077	0.20845	0.10489010989010988	0.6809981005376838	0.9792654595914081	0.6348839828790268
MSTO1	55154	0.070014	0.1540384615384615	1.1548151097740942	0.8123708275505616	0.6348276638882632
TTC16	158248	0.20966	0.10480769230769231	0.6784844185394673	0.9796068413581567	0.6342081549898626
PFDN5	5204	0.10793	0.14126373626373626	0.9668578229393754	0.8499693113422142	0.6341518359990989
HHEX	3087	0.27774	0.0759065934065934	0.5563615688335457	1.1197204987325446	0.6340955170083352
SGPP2	130367	0.014287	0.16994505494505496	1.8450589552696728	0.7696914679818958	0.6338139220545168
FAM89B	23625	0.14937	0.12700549450549448	0.825736619004878	0.8961774902109744	0.6338139220545168
GPR137C	283554	0.16951	0.11858516483516483	0.7708046761233557	0.9259696384018795	0.6335323271006984
MX2	4600	0.19071	0.11259615384615383	0.7196265338498806	0.9484764442264173	0.6334760081099347
R3HDM2	22864	0.14973	0.12751373626373627	0.8246911754142152	0.8944430288597245	0.6326875422392431
STK32A	202374	0.056085	0.15884615384615386	1.2511532757900992	0.7990232963144169	0.632518585266952
ACVRL1	94	0.3383	0.042376373626373635	0.47069800221201946	1.3728762109437767	0.632518585266952
CDH11	1009	0.0080222	0.17255494505494504	2.0957065149031577	0.763072590244983	0.632518585266952
TOX2	84969	0.087615	0.1493956043956044	1.0574215347046247	0.8256621803975747	0.6324622662761883
AP5S1	55317	0.085048	0.1504945054945055	1.070335894857722	0.8224793557311134	0.6324059472854247
ABCB8	11194	0.053062	0.15982142857142856	1.2752163847231905	0.7963649916902885	0.6320680333408425
GABARAPL2	11345	0.26457	0.08310439560439566	0.5774594026772744	1.080376004660568	0.6320680333408425
STAG3	10734	0.18798	0.11401098901098902	0.7258883547346512	0.9430532869369632	0.6319553953593151
MINDY3	80013	0.073577	0.15450549450549447	1.1332579238983	0.8110560716372885	0.6319553953593151
ACOT8	10005	0.29293	0.07059065934065935	0.5332361484028337	1.1512527616278643	0.6318427573777878
DHRS3	9249	0.11866	0.13881868131868133	0.925695655998565	0.8575520854108255	0.6317864383870241
MTHFD1L	25902	0.17441	0.11804945054945055	0.7584286179108325	0.9279360299651528	0.631448524442442
EPB41L2	2037	0.28164	0.075521978021978	0.5503056643537826	1.1219266438055877	0.6313922054516783
RAB13	5872	0.35907	0.03226648351648352	0.44482087830115075	1.4912483625354314	0.6311669294886235
ARPP19	10776	0.37399	0.022857142857142864	0.42714001010668784	1.640978057358332	0.6309416535255689
LRRC8E	80131	0.25993	0.08576923076923078	0.585143593209406	1.0666684849226573	0.6308853345348051
MAPK8IP2	23542	0.30364	0.06361263736263736	0.517641017246285	1.1964565983191437	0.6308853345348051
PSMB6	5694	0.15402	0.1265247252747253	0.812422880944913	0.8978245970091007	0.6307726965532777
SPHK1	8877	0.35874	0.03302197802197803	0.44522019619620634	1.481196915982335	0.6307163775625141
TRAPPC1	58485	0.032563	0.16594780219780222	1.4872755907783177	0.7800284949859431	0.6306600585717504
SERINC5	256987	0.046899	0.16199175824175824	1.328836417393914	0.7905070807732856	0.6304911015994593
DIO2	1734	0.28253	0.07593406593406592	0.5489354305252169	1.1195633449468954	0.6304347826086957
TPBG	7162	0.13771	0.1324862637362637	0.861034521710173	0.877829147333134	0.6303784636179319
ATP2B1	490	0.32498	0.05208791208791208	0.48814336565776306	1.2832630506470086	0.6303221446271683
BCL2L2	599	0.32727	0.050796703296703306	0.48509380352670006	1.2941644724898829	0.6302095066456409
ZBTB3	79842	0.16576	0.1225274725274725	0.780520261934861	0.9117665249369142	0.6300968686641135
ZCCHC4	29063	0.12604	0.13773351648351645	0.899491605498038	0.8609603643716366	0.6300405496733499
RAB11FIP4	84440	0.27404	0.08065934065934068	0.5621860411526542	1.093345332405023	0.6296463167380041
ACBD4	79777	0.0014789	0.17667582417582414	2.830061191058185	0.7528228740662882	0.6294210407749493
YY1AP1	55249	0.054229	0.16063186813186817	1.2657684040190194	0.794168289811772	0.6293647217841857
HOXB5	3215	0.28682	0.07439560439560441	0.5423905685314451	1.1284527236359492	0.6292520838026583
PIAS4	51588	0.39331	0.010906593406593409	0.4052650114097083	1.9623108768859407	0.6289704888488399
EDN1	1906	9.3749e-5	0.17760989010989015	4.0280333560994235	0.7505328544326431	0.6289141698580761
CDH15	1013	0.25352	0.09026098901098902	0.5959877738177559	1.0444999121225218	0.6288578508673125
GSTO1	9446	0.14541	0.13114010989010988	0.8374057255575783	0.8822644567481344	0.6286325749042577
MADD	8567	0.35545	0.03604395604395604	0.44922148143574375	1.4431675486094147	0.6286325749042577
STK10	6793	0.18768	0.11570054945054949	0.726582005228546	0.9366645786214992	0.628407298941203
ALX4	60529	0.02012	0.170728021978022	1.6963720236161102	0.767695191295081	0.628407298941203
ACTN2	88	0.25668	0.08884615384615385	0.5906079693808471	1.0513613680786735	0.6283509799504393
CHMP1A	5119	0.34412	0.04197802197802197	0.46329008577132674	1.376978029409385	0.6283509799504393
ADAP1	11033	0.39611	0.009038461538461544	0.4021841934704896	2.0439054856990815	0.6282383419689119
UPK2	7379	0.20738	0.10914835164835167	0.6832331298585685	0.9619828185936931	0.6282383419689119
CASKIN1	57524	0.36261	0.032019230769230786	0.44056022317229737	1.4945891057924603	0.6281257039873845
KMT2E	55904	0.23932	0.09616758241758243	0.6210210058299912	1.0169713016610913	0.6278441090335661
TRPV6	55503	0.10849	0.14436813186813188	0.964610290801323	0.8405286632847949	0.6278441090335661
FCN2	2220	0.061978	0.15940934065934068	1.207762442342914	0.7974862345211007	0.6276751520612751
FURIN	5045	0.3877	0.016085164835164836	0.41150419899279	1.793574484240674	0.6276751520612751
PPP1R14D	54866	0.02497	0.1694642857142857	1.6025814576486523	0.7709218145789077	0.6276188330705114
HOXA1	3198	0.34862	0.04023351648351648	0.4576477014472458	1.3954120076314385	0.6275625140797477
BSG	682	0.33805	0.0457554945054945	0.4710190597278633	1.3395567466218605	0.6275625140797477
IARS1	3376	0.14067	0.13326923076923078	0.8517985125414882	0.8752701090229924	0.627506195088984
SETD2	29072	0.26375	0.0862912087912088	0.5788075316942509	1.0640334472505513	0.6273935571074566
ANKRD42	338699	0.18319	0.11766483516483518	0.7370982373458622	0.9293533092524866	0.6269993241721108
BAZ1A	11177	0.25202	0.09188186813186812	0.5985649927701299	1.036770183360404	0.6269993241721108
REXO4	57109	0.38416	0.019010989010989007	0.4154878572870479	1.7209952891922982	0.6268303671998198
NCOR2	9612	0.35268	0.038887362637362644	0.45261916787976264	1.410191509947934	0.6268303671998198
MYL9	10398	0.24299	0.0953021978021978	0.61441159897034	1.0208970838069962	0.6267740482090561
TBC1D10C	374403	0.30476	0.0661813186813187	0.5160420350990264	1.1792645836507125	0.6264924532552376
MEFV	4210	0.090686	0.15166208791208788	1.042459753646009	0.8191229694330857	0.626436134264474
ZCRB1	85437	0.32923	0.05295329670329673	0.4825005980015835	1.2761069969260612	0.6261545393106556
PWP2	5822	0.07765	0.15586538461538463	1.1098585399354226	0.8072503244502653	0.6259855823383645
RLBP1	6017	0.10128	0.14787087912087915	0.9944763073267201	0.8301173451535311	0.6259292633476008
GEM	2669	0.27571	0.08185439560439559	0.5595474817503786	1.0869579938882505	0.625703987384546
YKT6	10652	0.35828	0.03642857142857143	0.44577743445757506	1.4385578595803017	0.6256476683937824
SOX18	54345	0.33046	0.05245879120879122	0.4808811014751739	1.2801817209397193	0.6254787114214914
SLC12A8	84561	0.1167	0.1428021978021978	0.9329291439546298	0.8452651084840622	0.6254223924307276
TMEM86B	255043	0.35573	0.038131868131868134	0.4488795076422848	1.4187119175302199	0.6252534354584366
HMOX1	3162	0.31645	0.0603021978021978	0.4996948999894346	1.2196668590709159	0.6252534354584366
RFX3	5991	0.1068	0.1465247252747253	0.9714287473074623	0.8340890842222876	0.625197116467673
PNPLA2	57104	0.072842	0.1576098901098901	1.1376181384257253	0.802416533766615	0.625197116467673
ME2	4200	0.31002	0.06364010989010989	0.5086102880706946	1.196269079109882	0.6251407974769092
CMTM7	112616	0.32613	0.05561813186813186	0.4866092495375222	1.254783602544624	0.6250281594953818
VASH1	22846	0.34135	0.04534340659340661	0.46680009281230384	1.3434858549827255	0.6249718405046182
COPS7A	50813	0.32998	0.05347527472527473	0.4815123817974382	1.2718469755948751	0.6247465645415634
EN1	2019	0.08817	0.15357142857142858	1.054679159207725	0.8136895757626327	0.6245212885785086
DGCR6	8214	0.15148	0.13123626373626374	0.8196447035512113	0.8819461423657021	0.624464969587745
UBC	7316	0.056482	0.162239010989011	1.2480899335287479	0.7898447098031451	0.6243523316062176
RFNG	5986	0.27334	0.08365384615384616	0.5632968099167819	1.0775140866801618	0.6243523316062176
FADD	8772	0.36478	0.03342032967032968	0.43796898100082216	1.4759892703822186	0.624296012615454
TAF1C	9013	0.22652	0.10353021978021977	0.6448934470455084	0.9849328640412475	0.6242396936246902
SLC6A18	348932	0.22042	0.10626373626373628	0.6567490019456369	0.9736149182380919	0.6240707366523992
CLDN15	24146	0.16575	0.1260164835164835	0.7805464629231892	0.8995726435170734	0.6240707366523992
KIAA0319L	79932	0.22184	0.10523351648351649	0.6539601434301947	0.9778459169733619	0.6240144176616355
ARNT	405	0.38868	0.018104395604395605	0.4104078059421982	1.742215969055046	0.6239017796801082
BCAR3	8412	0.30679	0.06675824175824174	0.513158800575725	1.1754951100507438	0.623732822707817
CDH24	64403	0.35834	0.03767857142857144	0.4457047106458615	1.4239055717085076	0.623732822707817
FAM131C	348487	0.003915	0.1781043956043956	2.407268233606038	0.7493253620461523	0.6236201847262897
VGLL4	9686	0.27576	0.08340659340659341	0.5594687296001087	1.0787996164256133	0.6232259517909439
EFNA4	1945	0.13236	0.1395604395604396	0.8782432415121846	0.8552376713651366	0.622662761883307
CHID1	66005	0.37762	0.027609890109890116	0.4229450120974397	1.5589353218925481	0.622662761883307
ZFP36L1	677	0.016375	0.17462912087912089	1.7858186913361793	0.7578833323225929	0.6225501239017797
PAM16	51025	0.23534	0.10092032967032967	0.628304250882291	0.9960213394686607	0.6225501239017797
ING4	51147	0.099065	0.15083791208791214	1.0040797561273422	0.8214894877685005	0.6224374859202523
MAPKBP1	23005	0.047831	0.16582417582417583	1.320290539263056	0.7803521525455037	0.6224374859202523
AKR7A2	8574	0.10806	0.14762362637362636	0.966335036796823	0.8308441304360391	0.6223248479387249
PPP3CB	5532	0.33863	0.049711538461538474	0.4702745693891833	1.3035427962048378	0.6222122099571976
SKIL	6498	0.39682	0.01314560439560439	0.4014064472266619	1.8812194415361938	0.6220432529849065
MKX	283078	0.27051	0.08596153846153845	0.5678166756053055	1.0656958205028628	0.6219306150033791
ZNF213	7760	0.19575	0.11646978021978024	0.708298229270019	0.933786744048175	0.6218742960126155
DDA1	79016	0.38084	0.02561813186813185	0.41925744351509303	1.591452543168331	0.6218742960126155
NRDC	4898	0.12442	0.14284340659340664	0.9051098029933492	0.8451398011068321	0.6218179770218518
SLC66A3	130814	0.083795	0.15611263736263736	1.076781894701388	0.8065619392520476	0.6217053390403244
PLEKHA1	59338	0.32592	0.05788461538461539	0.4868889883439111	1.2374368480409559	0.6217053390403244
ZNF8	7554	0.23832	0.10017857142857145	0.6228395097930128	0.999225165750039	0.6217053390403244
URB2	9816	0.018722	0.17431318681318686	1.727647759093206	0.7586697572183323	0.621592701058797
PIK3AP1	118788	0.39756	0.013076923076923076	0.40059731807041515	1.8834944309285628	0.6215363820680333
RBCK1	10616	0.39736	0.01337912087912088	0.40081585301283307	1.8735724224344217	0.6214800630772697
VKORC1	79001	0.35912	0.03891483516483516	0.44476040760640356	1.4098848047926	0.621423744086506
RABGAP1	23637	0.3335	0.05429945054945055	0.4769041617474322	1.2652045649700665	0.6213674250957423
NKG7	4818	0.086634	0.155467032967033	1.0623116332193354	0.8083616897137279	0.6212547871142149
SLC39A13	91252	0.40704	0.004807692307692308	0.39036291036769893	2.3180633349627615	0.6211984681234513
HSPA4	3308	0.32867	0.056909340659340675	0.4832399351914369	1.2448164460147433	0.6211421491326875
BNC2	54796	0.20493	0.1137912087912088	0.6883944599455323	0.9438912890916221	0.6209731921603965
GLIPR2	152007	0.40898	0.003255494505494505	0.3882979294058952	2.487383033302933	0.6208042351881055
PRIMA1	145270	0.0096873	0.17744505494505494	2.013797250657814	0.7509360991059064	0.620522640234287
LRTM2	654429	0.23126	0.10456043956043955	0.6358994786930585	0.9806325996980544	0.6204100022527597
MAP2K7	5609	0.39708	0.014354395604395607	0.40112198679252214	1.8430150888659642	0.6202973642712323
GNG10	2790	0.22578	0.1068543956043956	0.646314531296492	0.9712076078240233	0.6200157693174139
KDM2A	22992	0.37117	0.03225274725274725	0.430427133102351	1.4914332867374602	0.6199031313358865
DAND5	199699	0.0576	0.16417582417582413	1.239577516576788	0.7846907948417138	0.6197904933543591
LAMTOR1	55004	0.2448	0.0987912087912088	0.6111885865264765	1.0052817005878647	0.6195088984005407
PRKCH	5583	0.21755	0.11052197802197804	0.6624409123712642	0.9565513510777945	0.6193399414282496
PCF11	51585	0.18039	0.12309065934065933	0.7437875414348385	0.9097749019892465	0.6190020274836675
LSS	4047	0.15919	0.13130494505494505	0.7980842172593031	0.8817189177061456	0.6189457084929038
SDF2L1	23753	0.36405	0.037541208791208806	0.43883896461238403	1.4254917476203763	0.6188893895021401
SLC25A22	79751	0.39464	0.01755494505494505	0.4037988975459152	1.755600525490656	0.6187767515206127
ZNF35	7584	0.001617	0.1809478021978022	2.791289980093599	0.7424466874889869	0.6187204325298491
IRF9	10379	0.33755	0.053447802197802194	0.47166188767516093	1.2720701485092947	0.6186641135390853
CRTC1	23373	0.27695	0.08520604395604396	0.5575986305172976	1.0695295981480708	0.6186077945483217
LRRC45	201255	0.27117	0.08820054945054945	0.566758358887318	1.0545287093965425	0.6183825185852669
AIMP1	9255	0.050666	0.16693681318681314	1.2952833812135627	0.7774478814097866	0.6183261995945033
ZKSCAN7	55888	0.011541	0.1780494505494506	1.9377565589735222	0.7494593621959049	0.6178756476683938
LY6G5C	80741	0.32424	0.061140109890109894	0.4891334092663634	1.2136737850305146	0.6177630096868664
LSM4	25804	0.34895	0.04710164835164834	0.45723679733806866	1.3269638941980932	0.6177630096868664
POU6F2	11281	0.0053389	0.1803571428571429	2.2725482135970294	0.7438666532235577	0.617650371705339
SNX1	6642	0.24418	0.1	0.6122899106013944	1	0.617650371705339
TFCP2L1	29842	0.11173	0.1494642857142857	0.9518302012339824	0.8254625690129405	0.6174250957422843
HACD2	201562	0.13278	0.14252747252747253	0.8768673356890984	0.8461014162370135	0.6174250957422843
PON1	5444	0.25546	0.09626373626373629	0.5926770921603614	1.0165372861530129	0.6172561387699932
NAGPA	51172	0.11025	0.15026098901098903	0.9576214018601239	0.8231537569803453	0.6171998197792296
PAK1IP1	55003	0.10683	0.15179945054945054	0.9713067716060839	0.8187298004021561	0.6171435007884659
KRT222	125113	0.044853	0.16913461538461538	1.3482085037932903	0.7717674998413191	0.6170308628069385
NDUFAB1	4706	0.28818	0.08107142857142856	0.5403361629773942	1.0911321741490965	0.6169745438161748
S1PR1	1901	0.17407	0.12655219780219779	0.7592760706811542	0.8977303081503059	0.6169182248254111
FADS3	3995	0.41374	0.0018681318681318673	0.3832724898864426	2.7285924709428198	0.6167492678531201
FAHD2A	51011	0.23219	0.10663461538461538	0.6341564884662608	0.9721017931496203	0.6166366298715927
SPATA33	124045	0.40565	0.010535714285714284	0.3918485196861284	1.9773360153640562	0.616411353908538
ADGRA2	25960	0.25415	0.09706043956043953	0.5949098859612777	1.0129577462142108	0.6162987159270106
DMAC2	55101	0.26807	0.09082417582417582	0.5717517856570506	1.0417985344136274	0.6161860779454832
ATP2A2	488	0.38202	0.029217032967032954	0.4179138997525146	1.5343638894103084	0.6161297589547196
GPR6	2830	0.38385	0.027925824175824187	0.41583845505713324	1.5539940006749984	0.6160734399639558
PPP1R35	221908	0.1163	0.14803571428571435	0.9344202852715516	0.8296334964559267	0.6160734399639558
LIMK2	3985	0.14211	0.14010989010989014	0.8473753605523809	0.8535312075511196	0.6159044829916648
BAIAP2	10458	0.40534	0.011401098901098904	0.3921805368403404	1.9430532869369632	0.6157355260193738
ZNF101	94039	0.30925	0.07118131868131872	0.5096902916988417	1.147633970663231	0.6156228880378464
RNF126	55658	0.3037	0.07387362637362635	0.5175552080817347	1.1315105814257544	0.615510250056319
SYNGR4	23546	0.34715	0.04979395604395605	0.4594828304074279	1.3028233684060246	0.6154539310655553
WDR86	349136	0.13089	0.1442857142857143	0.8830935322935174	0.8407766662316142	0.6152849740932642
ARMC6	93436	0.36592	0.03899725274725274	0.4366138527373267	1.40896598678718	0.6152849740932642
CCDC86	79080	0.20446	0.11679945054945055	0.6893916435414766	0.9325592002364872	0.6151723361117368
LATS2	26524	0.32262	0.0636813186813187	0.49130871313923713	1.1959879520214787	0.6151160171209732
FDX1	2230	0.13689	0.14244505494505494	0.8636282765076767	0.8463526229239963	0.6150596981302096
TEC	7006	0.088622	0.15820054945054945	1.0524584531403054	0.8007920124759698	0.6150033791394458
DAB2IP	153090	0.097184	0.15528846153846151	1.012405229761829	0.8088608126316588	0.6150033791394458
SYCP1	6847	0.38721	0.02592032967032967	0.4120534352253728	1.586359479148106	0.614778103176391
RPL7A	6130	0.30253	0.07528846153846155	0.5192315526199688	1.1232715772408368	0.6146654651948638
VMO1	284013	0.096876	0.15542582417582418	1.0137838014689582	0.8084768210222898	0.6146654651948638
BICRA	29998	0.37147	0.03601648351648352	0.4300762542063634	1.4434986919589716	0.6141585942779906
ASCL1	429	0.026976	0.17502747252747253	1.5690224470553518	0.7568937785670146	0.6139896373056994
PEMT	10400	0.39546	0.020961538461538462	0.40289743797618366	1.6785768456941754	0.6137643613426448
RIMS4	140730	0.10642	0.15394230769230768	0.9729767454112964	0.8126420073794807	0.6134264473980626
ARHGEF10	9639	0.22424	0.1114010989010989	0.6492869152477703	0.9531105251018812	0.6131448524442442
HOXB3	3213	0.15251	0.13780219780219782	0.816701678924188	0.8607438558263959	0.6130885334534805
ALYREF	10189	0.28059	0.08674450549450548	0.5519278109349134	1.0617580244216878	0.6128069384996621
SEC11A	23478	0.28982	0.08285714285714288	0.5378716478850937	1.0816700464513194	0.6127506195088984
IMMT	10989	0.31651	0.06960164835164835	0.49961256407881705	1.1573804750223662	0.6124127055643163
PLIN3	10226	0.39193	0.025219780219780226	0.40679149249075935	1.5982587024478134	0.6123000675827889
GOLPH3L	55204	0.066113	0.16592032967032969	1.1797131354742663	0.7801003980460252	0.6121311106104979
MLF2	8079	0.35842	0.04494505494505496	0.4456077645029502	1.3473180843137516	0.6121311106104979
C1orf122	127687	0.40274	0.01748626373626374	0.39497523426997605	1.7573029756593816	0.6113989637305699
PEX3	8504	0.18045	0.12776098901098898	0.743643113604474	0.8936017349381977	0.6113426447398063
EIF2AK1	27102	0.31729	0.06993131868131867	0.4985436153034844	1.155328282275699	0.6113426447398063
CPT1B	1375	0.30636	0.0750686813186813	0.5137679391481248	1.1245412130273156	0.6113426447398063
NPC2	10577	0.14311	0.1427747252747253	0.8443300182801887	0.8453486668261965	0.6110047307952241
ZNF22	7570	0.11309	0.15304945054945052	0.9465757959306557	0.8151682251896132	0.6106668168506421
BASP1	10409	0.39694	0.022239010989010998	0.40127513464294534	1.6528845305596633	0.6105541788691147
GATD3A	8209	0.084811	0.1613598901098901	1.0715478160276823	0.7922044105605649	0.6105541788691147
DOCK6	57572	0.40138	0.01929945054945055	0.39644427137527743	1.7144550550719384	0.610497859878351
THOC6	79228	0.40086	0.020013736263736266	0.39700727786265577	1.698671827543047	0.6104415408875873
GSK3A	2931	0.12069	0.15120879120879122	0.9183287127090762	0.8204229584216011	0.6103289029060599
F5	2153	0.044168	0.17218406593406596	1.3548922658679181	0.7640070410188018	0.6102725839152963
RUNDC3B	154661	0.049356	0.17076923076923076	1.3066600444432002	0.7675903778561982	0.6101599459337689
LHX5	64211	0.18631	0.12649725274725282	0.7297638341629878	0.8979189063432177	0.6101599459337689
MYO1B	4430	0.27993	0.08888736263736262	0.5529505558522215	1.0511599794908297	0.6101036269430051
CLPTM1	1209	0.42066	0.001868131868131868	0.37606878250446707	2.7285924709428198	0.6100473079522415
DNMT3A	1788	0.16494	0.13489010989010988	0.7826740097728879	0.8700198915260875	0.6099346699707141
DNM2	1785	0.4165	0.00634615384615385	0.38038499425719363	2.1974894037569115	0.6098783509799505
GINM1	116254	0.33343	0.06179945054945056	0.4769953275784635	1.2090153861474702	0.6097093940076593
GMEB2	26205	0.41276	0.010027472527472537	0.3843023962185061	1.9988085191925808	0.6090335661184951
SERTAD2	9792	0.40351	0.018859890109890108	0.39414569789109544	1.7244608420762821	0.6089772471277315
LRRFIP2	9209	0.22082	0.11429945054945052	0.6559615944560673	0.9419558573030145	0.6086956521739131
CA4	762	0.085001	0.16196428571428573	1.0705759649689162	0.7905807399461051	0.6086956521739131
AP1B1	162	0.27759	0.09122252747252746	0.5565961831128743	1.0398978990741932	0.6086956521739131
GPC5	2262	0.049171	0.17164835164835163	1.308290959290361	0.7653603627798121	0.6086393331831493
ALKBH3	221120	0.33443	0.062225274725274726	0.47569477115507663	1.2060331773002053	0.6084703762108583
APLP2	334	0.33159	0.06362637362637363	0.4793985752577865	1.1963628285936574	0.6083577382293309
CLBA1	122616	0.18955	0.12601648351648354	0.7222762112375466	0.8995726435170733	0.6083577382293309
GPR45	11250	0.022753	0.1788736263736264	1.6429613331805455	0.7474536883021593	0.6082451002478035
MAP7D1	55700	0.31393	0.07350274725274723	0.5031671799613086	1.1336964283387825	0.6080761432755125
NYAP1	222950	0.23588	0.10990384615384616	0.627308880894231	0.9589871089034986	0.6079071863032215
ITGB3	3690	0.35938	0.04785714285714286	0.4444460956503186	1.3200532329774115	0.6078508673124577
SERPINI2	5276	0.085193	0.16244505494505493	1.069596088170686	0.7892935046499504	0.607625591349403
MYO1E	4643	0.16591	0.1358791208791209	0.78012743667646	0.8668472716237774	0.607625591349403
SP100	6672	0.29962	0.08107142857142859	0.5234292003192509	1.0911321741490965	0.6073439963955846
KLF13	51621	0.3649	0.04442307692307693	0.4378261366353517	1.3523913637426548	0.6073439963955846
CAPN2	824	0.26877	0.09615384615384616	0.570619208689517	1.0170333392987803	0.6071750394232935
TRIP12	9320	0.42322	0.0013049450549450544	0.3734338171439449	2.8844077740241896	0.6071750394232935
ZBTB2	57621	0.23849	0.10931318681318684	0.6225298264178657	0.9613274445026676	0.6071750394232935
PFKP	5214	0.34096	0.05940934065934067	0.46729656762987326	1.226145267512204	0.6071750394232935
NUDCD1	84955	0.253	0.10370879120879124	0.5968794788241821	0.9841844276838488	0.6070060824510025
TNIP1	10318	0.23455	0.1114835164835165	0.6297645627168228	0.9527893409517287	0.6068934444694751
ACRBP	84519	0.12352	0.15199175824175823	0.908262717008339	0.8181799610497604	0.6068371254787114
BIRC7	79444	0.0057451	0.18521978021978022	2.2407024075204793	0.7323126354641029	0.6067808064879477
MTMR9	66036	0.16835	0.13505494505494503	0.7737868792758926	0.8694895094346395	0.606724487497184
NOVA1	4857	0.17606	0.13145604395604396	0.7543393024797406	0.8812194415361936	0.6066681685064204
FAAP100	80233	0.40897	0.015645604395604397	0.388308548501975	1.8056076552339368	0.6066681685064204
ZNF141	7700	0.202	0.12218406593406596	0.6946486305533762	0.9129854268930933	0.6066118495156567
GALT	2592	0.0091829	0.18418956043956045	2.0370201450399295	0.7347349885364302	0.606555530524893
TTC21A	199223	0.25282	0.10418956043956042	0.5971885730080514	0.982175794190288	0.6064428925433656
RHOV	171177	0.083953	0.16358516483516483	1.075963780048069	0.7862560840532042	0.6064428925433656
CCDC114	93233	0.24077	0.10868131868131871	0.6183976272402983	0.963845100723914	0.6064428925433656
MED19	219541	0.35823	0.05008241758241757	0.44583804693787654	1.3003147149940797	0.6062176165803109
SLC15A3	51296	0.14349	0.14497252747252748	0.8431783644083733	0.8387142894719323	0.6061612975895472
VPS37C	55048	0.37263	0.04082417582417583	0.42872218349781427	1.3890825742244994	0.6061612975895472
LUZP1	7798	0.35227	0.05443681318681321	0.45312434060877116	1.2641073069788473	0.6059360216264924
IL2RB	3560	0.10262	0.15866758241758244	0.9887679896806341	0.7995117954586956	0.6058233836449651
AIMP2	7965	0.36955	0.04252747252747253	0.4323267933854445	1.3713304273021822	0.6057107456634377
EML4	27436	0.11627	0.15449175824175826	0.9345323275343487	0.8110946841718241	0.6055417886911466
MED15	51586	0.4141	0.011689560439560438	0.3828947694976219	1.9322018192284494	0.6055417886911466
RAD23A	5886	0.41854	0.008846153846153842	0.3782630300264285	2.053245511953225	0.605485469700383
NHLH2	4808	0.40078	0.024120879120879124	0.39709395906286427	1.6176068677429534	0.6053728317188556
KLK6	5653	0.23379	0.11260989010989012	0.6311740690411549	0.9484234653325542	0.6052601937373282
DPY19L1	23333	0.32307	0.07075549450549451	0.49070336831897465	1.1502398294324583	0.6052038747465646
BRD7	29117	0.28121	0.09155219780219782	0.5509692395995848	1.0383312255631592	0.6052038747465646
ERCC2	2068	0.26471	0.09943681318681322	0.5772296519635333	1.0024528026845887	0.6051475557558008
DHX38	9785	0.2094	0.120260989010989	0.6790233226571765	0.9198752288935723	0.6050349177742735
CBS	875	0.33872	0.06207417582417582	0.4701591593246632	1.2070890379818355	0.6048659608019824
TEX264	51368	0.38384	0.03537087912087912	0.41584976937624457	1.4513541459358275	0.604415408875873
EPHA2	1969	0.30879	0.07847527472527471	0.5103367725045017	1.1052671552524882	0.6040774949312908
CA9	768	0.30611	0.07998626373626375	0.5141224826408862	1.0969845892050119	0.6040211759405272
WWC2	80014	0.14769	0.14473901098901099	0.830648909507582	0.8394143992620071	0.6039648569497634
SLC9A3	6550	0.11405	0.15572802197802196	0.9429047103873326	0.8076332326763603	0.6039648569497634
DVL3	1857	0.27046	0.09749999999999999	0.567896956301673	1.0109953843014632	0.603514305023654
PARP2	10038	0.071783	0.1686813186813187	1.1439783953170743	0.7729330125078883	0.603514305023654
MAD1L1	8379	0.30327	0.08151098901098901	0.5181705487360013	1.088783837332214	0.6034016670421266
ZNF57	126295	0.22353	0.11623626373626374	0.650664181882752	0.9346583583177613	0.603345348051363
CCL20	6364	0.15192	0.14361263736263735	0.8183850482710389	0.8428073421593466	0.6031763910790718
HLA-C	3107	0.37741	0.04039835164835164	0.42318659678560155	1.3936363548059678	0.6030637530975445
SLPI	6590	0.15093	0.14420329670329673	0.8212244279545894	0.8410248108809153	0.6030637530975445
PDE8B	8622	0.31737	0.07483516483516484	0.49843412814898824	1.1258942804083085	0.6030074341067808
TRIM39	56658	0.35509	0.05475274725274727	0.44966155807284575	1.2615940849485683	0.6028947961252534
RNF130	55819	0.16428	0.13942307692307696	0.7844153058183851	0.8556653370638053	0.6027258391529624
ADTRP	84830	0.024582	0.1807967032967033	1.6093827856632141	0.7428094928490601	0.6027258391529624
OLFML2A	169611	0.19956	0.12576923076923074	0.699926504732856	0.900425595310532	0.6025005631899076
VMAC	400673	0.34141	0.06233516483516485	0.46672376242100594	1.20526688776412	0.6023316062176166
SYNGR2	9144	0.36492	0.048695054945054946	0.43780233380824296	1.3125151397939518	0.6022189682360892
UNG	7374	0.30386	0.08178571428571428	0.5173264664966702	1.0873225490023313	0.6020500112637982
MPZ	4359	0.28386	0.09255494505494506	0.546895801567791	1.0336003726679357	0.6019936922730345
XRCC3	7517	0.38738	0.034670329670329667	0.41186280518081	1.4600420287409406	0.6019373732822708
DES	1674	0.19504	0.12822802197802194	0.7098763117256933	0.8920170570279402	0.6018810542915071
FZD3	7976	0.2789	0.09509615384615383	0.5545514857339502	1.021837047701601	0.6018810542915071
BCAN	63827	0.035025	0.17850274725274726	1.4556218560421879	0.7483550954760058	0.6018247353007434
LUC7L2	51631	0.22916	0.11535714285714288	0.6398611864224251	0.9379555090111162	0.6016557783284524
HOXB6	3216	0.36659	0.048214285714285696	0.43581938608425724	1.3168242628472133	0.6015994593376887
RREB1	6239	0.37602	0.04195054945054944	0.4247890549163853	1.3772623465926348	0.601543140346925
DNPEP	23549	0.42394	0.006785714285714285	0.3726956045223408	2.16840443038939	0.6014305023653976
NR2E1	7101	0.24581	0.10982142857142856	0.6094004531970083	0.9593129112307838	0.6013741833746339
CLSTN1	22883	0.061142	0.17204670329670335	1.2136603592841604	0.7643536447737537	0.6012615453931065
SECTM1	6398	0.16691	0.1391620879120879	0.7775176428610886	0.8564790639579632	0.6012615453931065
PARL	55486	0.21756	0.1193269230769231	0.6624209498568665	0.9232615578000505	0.6012052264023429
SMG8	55181	0.023694	0.18197802197802193	1.625361615879812	0.7399810598722324	0.6010925884208155
RFX6	222546	0.29377	0.08876373626373628	0.5319925567407635	1.0517644256314118	0.6010362694300518
CD4	920	0.10607	0.16037087912087908	0.9744074311483264	0.7948744900748875	0.600642036494706
PIGR	5284	0.024401	0.18201923076923077	1.612592375071817	0.7398827253349836	0.6004730795224149
AQP12A	375318	0.26787	0.10054945054945055	0.572075922315679	0.9976202982546453	0.6004167605316513
CTBP2	1488	0.35268	0.05806318681318681	0.45261916787976264	1.2360991314840184	0.6002478035593602
TNFRSF10B	8795	0.31527	0.07795329670329675	0.5013173532429828	1.1081655134478767	0.6001351655778329
PPP1R13B	23368	0.41315	0.017101648351648346	0.38389224290753693	1.766962027881282	0.6000788465870691
TALDO1	6888	0.31308	0.07907967032967032	0.5043446748521544	1.1019351498579033	0.5997409326424871
WDFY3	23001	0.42583	0.00692307692307692	0.37076374549163377	2.159700842867512	0.5995156566794323
ACTR2	10097	0.15668	0.1441346153846154	0.8049864371241717	0.8412317064505008	0.5992340617256139
PFKFB2	5208	0.29566	0.08875000000000001	0.5292074274331039	1.0518316382728683	0.5991777427348501
VPS8	23355	0.20116	0.12721153846153843	0.6964583730511105	0.8954734951112795	0.5991777427348501
PGF	5228	0.3037	0.08375000000000002	0.5175552080817347	1.077015184291117	0.5991777427348501
VRK3	51231	0.4171	0.01506868131868132	0.3797598101541686	1.8219247517383261	0.5990651047533229
RBBP8NL	140893	0.31535	0.0786675824175824	0.5012071646706614	1.104204196199708	0.5987271908087407
TBC1D14	57533	0.14348	0.15002747252747253	0.843208631996071	0.8238292071135126	0.5982203198918675
TTI1	9675	0.12896	0.1550137362637363	0.8895449755389846	0.8096298158992563	0.5982203198918675
PARP3	10039	0.23328	0.11597527472527473	0.6321224933621195	0.9356345900398167	0.5981640009011039
STX4	6810	0.43307	9.478021978021974e-4	0.3634419000515454	3.023282288575782	0.5979387249380491
CD68	968	0.27372	0.09978021978021977	0.5626934686757266	1.0009555438000086	0.5978824059472855
KRTDAP	388533	0.10511	0.16173076923076923	0.978355963912557	0.791207347836887	0.5978824059472855
CDC42SE1	56882	0.16122	0.14322802197802198	0.7925810831831879	0.8439720057721269	0.5978260869565217
FLII	2314	0.42796	0.006909340659340666	0.368596821152931	2.1605633942571094	0.597600810993467
OAZ1	4946	0.071886	0.17081043956043954	1.1433556814497834	0.7674855897070825	0.5974881730119396
AQP9	366	0.010529	0.18861263736263736	1.977612874313562	0.7244292121660753	0.5973755350304123
TRIM46	80128	0.33513	0.07019230769230768	0.4747866934679653	1.1537104791783246	0.5973192160396485
SLC12A2	6558	0.186	0.13414835164835165	0.7304870557820837	0.8724146593649325	0.5973192160396485
CDH5	1003	0.30477	0.08449175824175827	0.5160277849560656	1.0731856522892893	0.5972065780581212
DGUOK	1716	0.032529	0.18119505494505492	1.4877292875068746	0.7418536589736686	0.5970939400765938
OTUB1	55611	0.42601	0.008804945054945055	0.3705802063107874	2.05527334979422	0.5970939400765938
DECR2	26063	0.34458	0.06471153846153846	0.4627099333351899	1.1890182750748035	0.5970376210858301
CES1	1066	0.0072167	0.18995879120879125	2.14166134805578	0.7213406026877348	0.5970376210858301
VAV3	10451	0.33526	0.070260989010989	0.4746182593226018	1.1532857412648583	0.5969813020950665
GATB	5188	0.23492	0.11620879120879124	0.6290800078290805	0.9347610162740135	0.5967560261320117
NAB2	4665	0.42213	0.012335164835164836	0.37455378224152047	1.9088550426457327	0.596699707141248
MAL	4118	0.25928	0.10788461538461536	0.5862309819758464	0.9670404823786378	0.5965870691597207
ABCB9	23457	0.37156	0.04835164835164836	0.4299710457933453	1.315588715834906	0.5965870691597207
SLC45A4	57210	0.28733	0.09456043956043955	0.5416190271432215	1.0242905176575146	0.5963054742059022
PER2	8864	0.08214	0.16918956043956046	1.0854453014823664	0.7716264378889938	0.5961928362243749
GZMA	3001	0.085974	0.16818681318681322	1.0656328669395938	0.7742080583877401	0.5961365172336112
COL16A1	1307	0.1436	0.15156593406593405	0.8428455600937185	0.8193983996913161	0.5960801982428475
PARP4	143	0.045899	0.17850274725274723	1.3381967763192277	0.7483550954760059	0.5960238792520838
RASSF5	83593	0.11571	0.1595879120879121	0.9366291064142958	0.7970000071728273	0.5958549222797928
CLN8	2055	0.39534	0.03384615384615384	0.4030292420688199	1.4704906758206495	0.5957422842982654
DIP2B	57609	0.12688	0.15689560439560438	0.8966068300264715	0.8043892234842844	0.595629646316738
COPS7B	64708	0.38408	0.041332417582417576	0.4155783070388907	1.3837091915729567	0.5955733273259743
WDR55	54853	0.24117	0.11423076923076927	0.6176767166180189	0.9422168986536055	0.5955733273259743
QTRT1	81890	0.12757	0.15659340659340665	0.894251444473007	0.8052265279765645	0.5955733273259743
TEAD2	8463	0.11084	0.16109890109890115	0.9553034828898059	0.7929074220159843	0.5955170083352106
FOXF2	2295	0.02714	0.18383241758241764	1.5663901566762817	0.7355779013517579	0.5951790943906285
MBD2	8932	0.094804	0.1660714285714286	1.0231733383868353	0.7797050784522652	0.5951790943906285
ALOX15B	247	0.36597	0.053969780219780224	0.4365545139729524	1.267849350501231	0.5951227753998648
ANKS3	124401	0.41994	0.01622252747252747	0.37681275610294135	1.7898814816995225	0.5950664564091012
DCBLD2	131566	0.34691	0.0653846153846154	0.4597831810393938	1.1845244265925439	0.5948974994368101
RHOQ	23433	0.41637	0.018887362637362633	0.380520569516492	1.7238286811467558	0.5947848614552828
P2RX5	5026	0.11812	0.15975274725274727	0.9276765617069591	0.7965516645845887	0.5944469475107006
ABR	29	0.39493	0.0350412087912088	0.40347987477297464	1.4554209207032471	0.594390628519937
MICALL1	85377	0.30857	0.08429945054945054	0.5106462994905816	1.0741752560291054	0.5943343095291732
ALPI	248	0.16049	0.1456318681318681	0.7945520229483234	0.8367435794226296	0.5941653525568822
KRT13	3860	0.28593	0.09630494505494507	0.5437402757335277	1.0163514122011479	0.5941653525568822
GNA11	2767	0.29921	0.0896291208791209	0.5240238958602343	1.0475508633027186	0.5941653525568822
E4F1	1877	0.10259	0.16451923076923078	0.98889497018402	0.7837833297576801	0.5938274386123
HPGD	3248	0.093729	0.16729395604395603	1.0281260164613972	0.7765197488413909	0.5934332056769542
TRAPPC4	51399	0.09679	0.16629120879120882	1.0141695101416077	0.7791307097365039	0.5932642487046632
NNMT	4837	0.086133	0.16945054945054944	1.0648304261060675	0.7709570186061555	0.5930952917323722
ACSS2	55902	0.039743	0.18119505494505497	1.4007393532737527	0.7418536589736684	0.5930952917323722
RAB8A	4218	0.36899	0.05331043956043957	0.4329854034985754	1.2731877365730222	0.5929826537508448
EMC6	83460	0.23951	0.11640109890109891	0.6206763492466846	0.9340429196480663	0.5928700157693174
MALL	7851	0.24673	0.1140934065934066	0.6077780412588072	0.9427394525391778	0.59275737778779
IFIT5	24138	0.20637	0.12954670329670331	0.6853534358307363	0.8875736344594573	0.5925321018247353
ARHGAP35	2909	0.14451	0.1532554945054945	0.8401020989659035	0.8145839462344022	0.5924757828339716
FKBPL	63943	0.3324	0.07439560439560443	0.47833898488792664	1.1284527236359492	0.5923631448524442
MCTP2	55784	0.078816	0.17175824175824173	1.1033856098409909	0.7650824143019068	0.5923631448524442
SLC44A4	80736	0.29439	0.09440934065934067	0.5310769464356935	1.0249850354039771	0.5923068258616806
ZSWIM8	23053	0.31826	0.08104395604395605	0.49721794155776716	1.091279367670893	0.5919689119170984
SHISA2	387914	5.947e-4	0.19538461538461532	3.2257020615007224	0.7091096356868989	0.5919689119170984
METTL22	79091	0.13379	0.15629120879120875	0.8735763462626616	0.8060654498812846	0.5919689119170984
MAST3	23031	0.38604	0.042458791208791216	0.4133676930504054	1.3720323742497322	0.5919125929263348
EPHA8	2046	0.15844	0.14793956043956044	0.8001351662677447	0.8299156760150556	0.5917999549448074
ARPC1B	10095	0.43446	0.00611263736263736	0.3620502021357907	2.2137713683321056	0.59168731696328
RDX	5962	0.028279	0.18508241758241759	1.5485359520943942	0.7326348362963776	0.5916309979725163
FAM78A	286336	0.35912	0.060412087912087915	0.44476040760640356	1.2188761542882656	0.591518359990989
HSPB8	26353	0.40124	0.03357142857142857	0.3965957782604363	1.4740301777425207	0.591518359990989
POU2F3	25833	0.37476	0.0503021978021978	0.4262467697221766	1.2984130393473596	0.5914620410002253
H2AC18	8337	0.28677	0.09763736263736265	0.5424662836734461	1.0103839601797733	0.5914057220094616
DPM2	8818	0.39776	0.035755494505494506	0.40037889303844926	1.4466572112038014	0.5912367650371705
CIC	23152	0.41325	0.024038461538461543	0.3837871377565149	1.6190933306267428	0.5912367650371705
ANKHD1-EIF4EBP3	404734	0.38671	0.04252747252747251	0.41261459728647404	1.3713304273021825	0.5911241270556432
VWA1	64856	0.18269	0.1393956043956044	0.7382852242056336	0.8557509207633441	0.5910678080648795
SEC63	11231	0.27953	0.10111263736263736	0.5535715754867341	0.9951945615813979	0.5909551700833521
CARNS1	57571	0.3305	0.07645604395604395	0.4808285361783409	1.116588177315013	0.5908425321018247
PSME3IP1	80011	0.29209	0.09616758241758243	0.5344833112878702	1.0169713016610913	0.5905046181572426
CORO6	84940	0.01695	0.1900961538461539	1.7708302974608991	0.721026669985108	0.5903919801757153
PLSCR3	57048	0.42342	0.016456043956043945	0.37322863218222246	1.7836745612597449	0.5903356611849516
XKR6	286046	0.0060105	0.19385989010989013	2.221089398511619	0.7125120377798836	0.5902230232034242
ARHGEF37	389337	0.13074	0.1587912087912088	0.8835915193701007	0.7991735452285269	0.5901667042126605
FZD10	11211	0.059423	0.17762362637362633	1.2260454264038325	0.7504992676044371	0.5901667042126605
TMEM45A	55076	0.20045	0.13234890109890107	0.6979939394134596	0.8782796603215655	0.5901103852218968
CERS5	91012	0.060155	0.17751373626373623	1.2207282688700694	0.7507680349879067	0.5901103852218968
KIRREL1	55243	0.051108	0.17972527472527472	1.2915111138786264	0.7453908438600931	0.5899977472403695
AMPD3	272	0.36153	0.06017857142857144	0.4418556588290037	1.2205581261348617	0.5899977472403695
ZHX1	11244	0.18752	0.13848901098901098	0.7269524056620034	0.8585846862109054	0.5898287902680784
CHST13	166012	0.015394	0.1911263736263736	1.812648517776539	0.7186793802914062	0.5897724712773147
G3BP1	10146	0.21506	0.12729395604395605	0.667440358532596	0.8951922162919241	0.5897724712773147
IFT27	11020	0.26961	0.1070879120879121	0.569264003589697	0.9702595488674534	0.5897724712773147
STARD7	56910	0.0056668	0.19421703296703297	2.246662114767915	0.711712684833739	0.589716152286551
EFNA3	1944	0.1083	0.16505494505494506	0.9653715433746797	0.782371459652944	0.5896035143050237
KRT80	144501	0.24709	0.11550824175824176	0.6071448306104649	0.9373870268330886	0.5896035143050237
IRF2BP1	26145	0.20979	0.12979395604395605	0.6782152170400985	0.8867455303235698	0.5895471953142599
CES5A	221223	0.086605	0.17075549450549452	1.0624570339673522	0.7676253128585822	0.5894908763234963
TM4SF19	116211	0.058679	0.178282967032967	1.231517295956609	0.7488901468804383	0.5893782383419689
CD48	962	0.19538	0.13581043956043956	0.7091198947328384	0.8670668451568957	0.5893219193512053
DOCK3	1795	0.036814	0.18406593406593408	1.4339869920195585	0.7350265809482295	0.5892656003604415
ZMYND12	84217	0.19828	0.13475274725274722	0.7027210897668866	0.8704623719330888	0.5892092813696779
MGMT	4255	0.36965	0.055879120879120864	0.43220928946646386	1.2527504350623304	0.5891529623789141
CD27	939	0.0077147	0.19387362637362635	2.1126809575953613	0.7124812662149221	0.5891529623789141
POLL	27343	0.16324	0.14756868131868134	0.7871734138987667	0.8310058035814718	0.5890403243973868
ADAMTS12	81792	0.056596	0.1788186813186813	1.247214262085843	0.7475871121071729	0.5887587294435683
SOAT2	8435	0.029857	0.18649725274725273	1.5249538318722022	0.7293275613110376	0.5887024104528047
KRTCAP2	200185	0.31438	0.08510989010989009	0.5025450903868235	1.0700199702258688	0.5885897724712773
MRPL55	128308	0.43286	0.010315934065934068	0.363652544891169	1.9864914423088686	0.5885897724712773
FBXL5	26234	0.2419	0.11758241758241757	0.6163641316381203	0.929657614635884	0.5882518585266951
POTEF	728378	0.18156	0.14138736263736265	0.7409798259291884	0.8495894065372014	0.5881392205451679
PLA2G5	5322	0.26696	0.10903846153846154	0.5735538063532637	0.9624202847418926	0.5880829015544041
SLCO3A1	28232	0.11052	0.165260989010989	0.9565591237555263	0.7818296525191254	0.5879702635728767
STK19	8859	0.43799	0.005453296703296703	0.3585358050082219	2.263340872549922	0.5879139445821131
ACTR1A	10121	0.4327	0.011153846153846155	0.36381310480127577	1.952575350071862	0.5878576255913494
BCL7A	605	0.37018	0.056428571428571446	0.43158704891178423	1.2485009443877966	0.5878576255913494
MN1	4330	0.14394	0.15556318681318682	0.8418185016485257	0.8080931686281677	0.5878576255913494
GBA	2629	0.31416	0.0856868131868132	0.5028491117376381	1.067086008891912	0.5876323496282947
ZNF462	58499	0.19849	0.13574175824175827	0.7022613682671975	0.8672865297596392	0.5874633926560036
HPS6	79803	0.32686	0.0803846153846154	0.4856382236294261	1.094827061859764	0.5874633926560036
SMOC1	64093	0.35889	0.06353021978021978	0.4450386425453439	1.1970196422379857	0.5873507546744763
ZNF593	51042	0.43797	0.006483516483516484	0.358555636712043	2.188189380678949	0.5872381166929489
PON2	5445	0.25402	0.11480769230769229	0.595132088310409	0.9400290125054301	0.5869565217391305
SF3B4	10262	0.19877	0.1360989010989011	0.7016491622808431	0.8661453813992378	0.5868438837576031
RHBDF2	79651	0.37879	0.05168956043956046	0.4216014948275421	1.2865971609931728	0.5867875647668394
GPX3	2878	0.31265	0.08710164835164834	0.5049415669833127	1.0599736261260757	0.5865622888037846
C1QTNF1	114897	0.31707	0.08519230769230768	0.4988448473794326	1.0695996174117297	0.5865622888037846
RING1	6015	0.41868	0.02512362637362638	0.3781177845042643	1.5999176738366203	0.585773822933093
KIF1C	10749	0.4357	0.009601648351648357	0.3608124400642461	2.0176542035673557	0.5856611849515657
SLC25A31	83447	0.13921	0.1584615384615385	0.8563295665298395	0.8000761319376833	0.585604865960802
ORC5	5001	0.4217	0.02207417582417582	0.37499639898513654	1.6561155025496928	0.585435908988511
USP14	9097	0.28258	0.10350274725274729	0.5488585792072369	0.9850481226623864	0.5853232710069836
SUMF2	25870	0.4142	0.028736263736263735	0.3827899054425662	1.5415696991178005	0.5848727190808741
KAT8	84148	0.43023	0.015810439560439562	0.36629930947576383	1.8010560556832453	0.5848727190808741
ANKRD13B	124930	0.060464	0.1798901098901099	1.2185031254270606	0.7449927129091521	0.5848727190808741
PRORP	9692	0.37617	0.055576923076923065	0.42461584290040794	1.2551055008782515	0.5845911241270556
CTNND1	1500	0.39302	0.04339285714285715	0.4055853486865821	1.3625817534078881	0.584534805136292
ZNF532	55205	0.40632	0.034354395604395606	0.3911318001794587	1.4640176875825346	0.5842532101824736
WRAP73	49856	0.33386	0.07940934065934066	0.47643561095430575	1.1001284099379218	0.5841405722009462
NTRK3	4916	0.19549	0.139010989010989	0.7088754533877849	0.8569508668092569	0.5840279342194188
ASL	435	0.30774	0.0916758241758242	0.5118160505506028	1.0377451769942632	0.5839716152286551
GALNT12	79695	0.036496	0.18706043956043952	1.4377547320674267	0.728018049470713	0.5838589772471278
KLF6	1316	0.30488	0.09337912087912091	0.5158710642358892	1.0297502190659962	0.5836900202748366
EXOC5	10640	0.2922	0.10035714285714285	0.534319788401722	0.9984517114371394	0.583633701284073
KCNN1	3780	0.3176	0.0867857142857143	0.49811950624494133	1.0615517577439069	0.5835773822933094
SYNCRIP	10492	0.077148	0.17646978021978024	1.112675328190884	0.7533296551910115	0.5834084253210182
ACADVL	37	0.4213	0.02440934065934066	0.37540854087315223	1.6124439515077356	0.5833521063302546
CHRM4	1132	0.027303	0.1901510989010989	1.5637896309129453	0.7209011604164567	0.5832957873394908
HNF4A	3172	0.077671	0.17638736263736265	1.1097411033469955	0.7535325333394705	0.5832957873394908
OSTM1	28962	0.070823	0.17820054945054944	1.149825680855925	0.7490909612252168	0.5832394683487272
MTRF1L	54516	0.21554	0.13115384615384618	0.6664721214789084	0.8822189689783202	0.5830141923856724
AHCTF1	25909	0.2179	0.1303434065934066	0.6617427697537444	0.8849109326776519	0.582901554404145
SGCE	8910	0.35066	0.07193681318681316	0.45511377152951304	1.1430488054115515	0.582901554404145
KISS1R	84634	0.23536	0.12333791208791209	0.6282673446165451	0.9089034077531833	0.582901554404145
WDR4	10785	0.25697	0.11603021978021981	0.5901175754817565	0.9354288851303921	0.5828452354133814
RSC1A1	6248	0.13857	0.15994505494505493	0.8583307830337908	0.7960291825462641	0.5827889164226177
DNLZ	728489	0.43432	0.014052197802197802	0.36219017135237663	1.852255745600877	0.582732597431854
STYK1	55359	0.25945	0.11510989010989016	0.585946324969054	0.9388873606827605	0.5826762784410904
ERC1	23085	0.40484	0.03712912087912088	0.3927165838139017	1.4302853336143118	0.5825073214687992
ATF6B	1388	0.36936	0.060673076923076906	0.43255013845691526	1.2170039800546462	0.5824510024780356
WDR48	57599	0.032729	0.18927197802197804	1.4850672638981228	0.7229136791754512	0.5823383644965082
PIAS1	8554	0.28783	0.10322802197802197	0.5408639423123824	0.9862023943901103	0.5821694075242172
PTF1A	256297	0.30172	0.09601648351648354	0.5203959009560936	1.0176542035673557	0.5821130885334534
EDEM1	9695	0.054443	0.183228021978022	1.2640579516621575	0.7370081067610393	0.5820567695426898
LMAN1	3998	0.38492	0.05118131868131869	0.4146295228779221	1.2908885287528133	0.5820567695426898
OSBPL5	114879	0.39472	0.04368131868131867	0.4037108678543392	1.3597042593286046	0.5819441315611624
CUL1	8454	0.23862	0.12282967032967033	0.622293158630376	0.9106967137810241	0.5818878125703988
TGOLN2	10618	0.3055	0.09423076923076924	0.514988785421427	1.0258072636062854	0.581831493579635
EMILIN1	11117	0.24441	0.12056318681318681	0.6118810289696948	0.9187852809564465	0.581662536607344
DEF6	50619	0.23191	0.1257967032967033	0.6346805241037832	0.9003307401213586	0.581662536607344
MTMR4	9110	0.33239	0.08126373626373629	0.47835205050208857	1.0901032139881823	0.581493579635053
CDH23	64072	0.33648	0.07982142857142857	0.47304074465775414	1.0978805038742638	0.5813809416535256
NAXD	55739	0.29935	0.09791208791208793	0.5238207375182964	1.0091636882842188	0.5812119846812345
CCDC130	81576	0.3955	0.04373626373626373	0.4028535121663046	1.3591583202474058	0.5812119846812345
LRRC29	26231	0.27939	0.10800824175824178	0.553789142325416	0.9665431036467742	0.5809867087181798
SCARF1	8578	0.40598	0.03678571428571428	0.391495360766607	1.434320806637047	0.5809303897274161
SLC6A16	28968	0.10542	0.17027472527472526	0.9770769881210614	0.7688498117457918	0.5808740707366524
RCAN1	1827	0.20574	0.13675824175824178	0.6866812645014122	0.8640464913764815	0.5808740707366524
PPIE	10450	0.35884	0.06844780219780222	0.44509915199633604	1.1646404921419802	0.5807051137643613
PSMD3	5709	0.34266	0.07719780219780219	0.4651365894515847	1.1123950637439761	0.5807051137643613
USP1	7398	0.10665	0.16998626373626377	0.9720391402145525	0.7695861717074308	0.580592475782834
SNTB1	6641	0.088022	0.17505494505494507	1.0554087677987967	0.756825616519962	0.5803671998197792
ADRB2	154	0.17867	0.14706043956043954	0.7479483625934839	0.8325041402656245	0.5801982428474882
TEX33	339669	0.16031	0.15442307692307697	0.7950393858843977	0.8112877983561181	0.5800856048659608
NOP14	8602	0.39335	0.04662087912087913	0.40522084549485027	1.33141954133138	0.5799166478936697
INHBB	3625	0.42864	0.0210989010989011	0.36790730373586633	1.675740163617544	0.5798603289029061
EEF2	1938	0.30968	0.09332417582417582	0.5090868416891013	1.0300058367790281	0.5798603289029061
CAMK2N1	55450	0.40757	0.036428571428571414	0.3897977905977799	1.438557859580302	0.5798040099121424
ABI2	10152	0.13066	0.1637912087912088	0.8838573461462063	0.785709411952444	0.5798040099121424
FABP1	2168	0.25215	0.11924450549450555	0.5983410275048477	0.9235616230919759	0.579691371930615
ADRA1D	146	0.39816	0.04347527472527472	0.3999423722640333	1.3617576649596634	0.579691371930615
HGH1	51236	0.16461	0.15335164835164836	0.7835437850842583	0.8143115514964437	0.5796350529398513
HOXD12	3238	0.42703	0.02293956043956044	0.36954161355391957	1.6394149081654539	0.5790718630322145
FHOD3	80206	0.24962	0.1203434065934066	0.6027206211464073	0.9195776989788272	0.5790155440414507
BCL7B	9275	0.40916	0.03626373626373625	0.3881068300634748	1.4405274524432063	0.5788465870691597
CTTN	2017	0.2634	0.1158241758241758	0.579384229374235	0.9362007814445659	0.5786776300968687
GFRA1	2674	0.29738	0.10086538461538462	0.5266882428810182	0.9962578511052225	0.5786213111061049
HCN2	610	0.42857	0.022032967032967043	0.36797823294528015	1.6569270153648923	0.5785649921153413
CACNA1D	776	0.1489	0.15906593406593406	0.8271053022478239	0.7984228199216198	0.5784523541338139
SPRYD3	84926	0.28614	0.10660714285714287	0.5434214271824893	0.9722136958768313	0.5784523541338139
SLC35F4	341880	0.074993	0.17932692307692313	1.1249792726516556	0.7463545031540738	0.5783397161522865
FES	2242	0.29975	0.0992445054945055	0.5232408082291137	1.0032935278844517	0.5783397161522865
NOL10	79954	0.29701	0.10134615384615386	0.5272289282191273	0.9941927284222525	0.5782270781707591
PLA2G15	23659	0.3558	0.0721565934065934	0.44879405625209373	1.1417239785099287	0.5782270781707591
TFAP2C	7022	0.37867	0.058667582417582444	0.42173910034668344	1.231601807886213	0.5782270781707591
PRDM6	93166	0.18944	0.14464285714285713	0.7225283149571743	0.8397030081275507	0.5781144401892319
B2M	567	0.039394	0.18960164835164836	1.404569919426208	0.7221578913285785	0.5780018022077045
CALML4	91860	0.37786	0.059079670329670333	0.42266907976524537	1.2285619367589453	0.5780018022077045
CDK10	8558	0.44663	0.008475274725274724	0.35005210885778304	2.0718462152797956	0.5779454832169407
CLINT1	9685	0.39326	0.04862637362637361	0.4053202251201839	1.3131281172872495	0.5777765262446497
MRPL40	64976	0.0044724	0.2005494505494506	2.3494593611985355	0.6977785235286	0.5777765262446497
PDGFC	56034	0.062678	0.18326923076923077	1.202884869938317	0.7369104429964728	0.5776638882631223
ZNF827	152485	0.15003	0.15940934065934065	0.8238218907326698	0.7974862345211007	0.5775512502815949
SYBU	55638	0.051005	0.1863324175824176	1.292387248098696	0.7297115812154222	0.5775512502815949
ARHGEF1	9138	0.31002	0.09489010989010987	0.5086102880706946	1.0227790504176162	0.5774949312908313
PARP6	56965	0.24082	0.12469780219780217	0.6183074479418362	0.904141200906207	0.5772696553277765
BLCAP	10904	0.39317	0.049134615384615395	0.40541962749176663	1.3086124391640674	0.5771006983554855
ZNF177	7730	0.049983	0.187032967032967	1.3011776808957407	0.7280818365725246	0.5770443793647217
BMP10	27302	0.078835	0.1791346153846154	1.1032809280413687	0.7468204844025377	0.5767064654201397
GCLC	2729	0.33455	0.08346153846153848	0.4755389657845503	1.0785136141222884	0.5767064654201397
ADAMTS3	9508	0.31858	0.09081043956043958	0.49678149206996663	1.0418642221520726	0.576650146429376
MACF1	23499	0.094253	0.17515109890109892	1.025704817645134	0.7565871335664641	0.5764811894570849
TLE6	79816	0.30869	0.09601648351648352	0.5104774392421126	1.0176542035673557	0.5764248704663213
AGTRAP	57085	0.45211	0.0030082417582417567	0.3447558869122022	2.521687264472919	0.5763685514755575
CCNL1	57018	0.20297	0.14083791208791208	0.6925681482802536	0.8512804219391144	0.5763122324847939
CHKA	1119	0.16765	0.1539560439560439	0.7755964422351611	0.8126032570353192	0.5762559134940302
POU2F2	5452	0.064448	0.1835576923076923	1.1907905554624947	0.7362274109051136	0.5762559134940302
UBR5	51366	0.33036	0.08548076923076924	0.4810125425590449	1.0681315783285665	0.5761995945032665
DUSP7	1849	0.40095	0.04457417582417583	0.39690978218778156	1.350916678176649	0.5760306375309755
RBM19	9904	0.40595	0.040673076923076916	0.3915274542585658	1.3906929719237382	0.5759743185402117
KLK1	3816	0.28076	0.11031593406593408	0.5516647662598244	0.957361753406442	0.5759743185402117
SH3BP2	6452	0.44498	0.01107142857142857	0.3516595083108267	1.9557963375079466	0.5759179995494481
IL17RC	84818	0.39759	0.047019230769230785	0.40056454731153124	1.32772448017516	0.5758616805586844
CLDN11	5010	0.21944	0.13410714285714287	0.658684205403527	0.872548090002032	0.5756364045956296
ATG5	9474	0.35555	0.07377747252747256	0.4490993170237137	1.1320762269375373	0.5754674476233386
SLC16A5	9121	0.14681	0.16118131868131866	0.8332443613347624	0.7926852954327244	0.5754674476233386
CLK1	1195	0.30107	0.10068681318681319	0.5213325174316513	0.9970274046719092	0.5753548096418112
ISM2	145501	0.201	0.14184065934065934	0.6968039425795111	0.8481992586018333	0.5753548096418112
AXL	558	0.42342	0.02875	0.37322863218222246	1.5413621509743507	0.5753548096418112
TMEM14C	51522	0.26618000000000003	0.11629120879120876	0.574824579274365	0.9344531151750458	0.5752984906510475
GLDC	2731	0.3897	0.0535164835164835	0.4092695942073097	1.2715124311064594	0.5751858526695202
LRRN3	54674	0.13607	0.16471153846153846	0.8662376152126543	0.7832759763332698	0.5750732146879928
PTPRO	5800	0.38232	0.058750000000000004	0.4175729824872625	1.230992129056226	0.5750168956972291
MNT	4335	0.38329	0.0579945054945055	0.416472511299971	1.2366131503413995	0.574847938724938
HCRTR1	3061	0.21047	0.13862637362637367	0.6768097989397895	0.8581541374675	0.5747916197341744
IGFBP6	3489	0.20528	0.14072802197802198	0.6876533609691468	0.8516194165758234	0.5747916197341744
ROCK1	6093	0.41086	0.0382142857142857	0.3863061381853879	1.4177742536570097	0.5747916197341744
ADAMDEC1	27299	0.053362	0.1875	1.2727679014924387	0.7269987279362623	0.5745663437711196
SOX9	6662	0.15412	0.15929945054945055	0.8121409996590366	0.7977857221508662	0.5745663437711196
ARHGEF4	50649	0.1079	0.17252747252747253	0.9669785553170893	0.7631417399118599	0.5743973867988286
ZFYVE21	79038	0.44511	0.012362637362637369	0.35153264859316025	1.907888869873712	0.5742847488173012
KMT2C	58508	0.30322	0.10006868131868134	0.5182421565915121	0.9997018232070282	0.5742284298265375
CSAD	51380	0.2981	0.10362637362637364	0.52563802396736925	0.9845296995837651	0.5741721108357738
NME4	4833	0.2525	0.12256868131868139	0.5977386175453198	0.9116204863270404	0.5740594728542464
BTBD7	55727	0.31631	0.09425824175824174	0.4998870778403057	1.0256806655928827	0.5739468348727191
SPEN	23013	0.33738	0.08401098901098901	0.47188066610695345	1.0756639025727546	0.573777877900428
CHPT1	56994	0.21923	0.1358653846153846	0.6591000161412873	0.8668911774502217	0.573439963955846
HSPB7	27129	0.0041207	0.20244505494505496	2.3850290023371343	0.6936928271262647	0.5732710069835548
SNRK	54861	0.34787	0.07960164835164835	0.45858302280814117	1.0990779390134224	0.5731020500112638
KIAA1614	57710	0.016124	0.19921703296703294	1.7925272105189864	0.7006735323412864	0.5730457310205002
TRIM11	81559	0.32187	0.09171703296703294	0.49231949998918195	1.0375500030795546	0.5729894120297364
ST6GALNAC2	10610	0.34699	0.08005494505494506	0.4596830410805922	1.0966118362150845	0.5729894120297364
NDUFB7	4713	0.21289	0.1386813186813187	0.6718447380300531	0.8579820374129781	0.5729894120297364
MTERF4	130916	0.21111	0.13951923076923078	0.6754911942529421	0.8553659268610444	0.5729330930389728
FAM234A	83986	0.45668	0.002266483516483516	0.340388007617505	2.644647435099131	0.5726514980851544
TMEM204	79652	0.071226	0.18348901098901096	1.1473614446306661	0.7363899401843217	0.5726514980851544
EMID1	129080	0.16813	0.15553571428571428	0.7743547870245466	0.8081698719985372	0.5726514980851544
TRMT1L	81627	0.26607	0.11774725274725274	0.5750040903826394	0.9290492169432462	0.5725951790943906
COL5A1	1289	0.16065	0.1585164835164835	0.7941192701124632	0.7999255704933246	0.5723135841405722
HID1	283987	0.27345	0.11513736263736264	0.5631220722893424	0.9387837228152116	0.5723135841405722
LRIG2	9860	0.073953	0.18315934065934067	1.1310442035870514	0.7371709285234921	0.5722572651498086
INSIG1	3638	0.429	0.02748626373626373	0.36754270781527576	1.5608842906768259	0.5722572651498086
GNL1	2794	0.41596	0.03585164835164836	0.38094843046583265	1.4454908719747561	0.5722009461590448
PKN1	5585	0.44702	0.012815934065934063	0.3496730457823171	1.8922497355665373	0.5722009461590448
HLA-B	3106	0.42749	0.0286401098901099	0.3690740399898776	1.5430253200032606	0.5721446271682812
SEPTIN5	5413	0.27695	0.1139010989010989	0.5575986305172976	0.943472085891214	0.5720883081775174
ALKBH2	121642	0.25746	0.12171703296703297	0.5892902350836845	0.9146486427561186	0.5720319891867538
NECTIN4	81607	0.35103	0.07864010989010992	0.45465576593388807	1.1043558883011115	0.57197567019599
MAPK1	5594	0.44815	0.012348901098901091	0.34857659924094797	1.9083716875798087	0.5717503942329354
CTDP1	9150	0.33211	0.08770604395604398	0.47871804737832585	1.056970477713603	0.571637756251408
ELAVL1	1994	0.033922	0.19414835164835167	1.4695185501842558	0.7118662923343334	0.5715814372606443
IFNA2	3440	0.20667	0.14263736263736262	0.6847225605281898	0.8457666998567432	0.5714687992791169
PPP1R3C	5507	0.16849	0.15596153846153843	0.7734258697107131	0.8069824894236433	0.5714687992791169
BOP1	23246	0.24009	0.12887362637362637	0.6196259283863791	0.8898359507018976	0.5712998423068258
USP32	84669	0.26083	0.12085164835164834	0.5836424586258661	0.917747421672193	0.5712998423068258
SCNN1A	6337	0.14021	0.16546703296703294	0.8532210106921669	0.7812885204784756	0.5711872043252985
S100A13	6284	0.37105	0.06785714285714285	0.4305675640750612	1.1684044303893903	0.5711308853345348
FOXI1	2299	0.40493	0.044917582417582425	0.39262004651681176	1.347583626652751	0.5711308853345348
NGF	4803	0.42371	0.031401098901098906	0.37293128607319115	1.5030551532537741	0.5706803334084253
EARS2	124454	0.35861	0.07567307692307691	0.4453776041094021	1.121058606939716	0.5706803334084253
NPR1	4881	0.42849	0.02895604395604397	0.3680593090861645	1.538260772772528	0.5706240144176616
PCBP4	57060	0.24774	0.1266758241758242	0.6060038667416543	0.8973062614296483	0.5706240144176616
TNFRSF12A	51330	0.44977	0.0117445054945055	0.3470095157055534	1.9301652645848644	0.5704550574453706
ENTPD3	956	0.33914	0.08506868131868128	0.4696209841683154	1.070230299303466	0.5703424194638432
TM4SF5	9032	0.067673	0.1856318681318681	1.1695845704565881	0.731347464724081	0.5703424194638432
SORT1	6272	0.29693	0.10718406593406596	0.5273459217159868	0.9698697723975019	0.5701734624915521
TUBA3D	113457	0.29966	0.1050686813186813	0.5233712248176425	0.9785267183907448	0.5701171435007885
CAMSAP1	157922	0.4266	0.030425824175824165	0.36997914888659006	1.516757648753949	0.5701171435007885
KLF9	687	0.24497	0.12792582417582418	0.6108870978077368	0.8930417763581157	0.5698918675377337
APAF1	317	0.44298	0.017760989010989013	0.3536158811938914	1.750532854432643	0.5696102725839153
KRT31	3881	0.20747	0.14313186813186818	0.6830446930549793	0.8442636603495314	0.5696102725839153
PAIP1	10605	0.11596	0.17241758241758237	0.9356917933170402	0.763418448734157	0.5694413156116243
DCC	1630	0.32379	0.0935989010989011	0.48973656821971284	1.0287292500811787	0.5694413156116243
TPM2	7169	0.40584	0.04528846153846153	0.39164515069065226	1.3440124321698843	0.5692723586393332
ATP6V1B1	525	0.24636	0.12789835164835164	0.6084298045817833	0.8931350526647249	0.5692160396485695
ABCF3	55324	0.42983	0.029120879120879132	0.3667032761880549	1.5357955183842855	0.5692160396485695
SIT1	27240	0.029603	0.19681318681318682	1.5286642748388428	0.7059458064720621	0.5692160396485695
ATXN7L1	222255	0.092392	0.1788873626373626	1.0343656316615917	0.747420338754675	0.5691034016670421
TP53I13	90313	0.38084	0.06434065934065936	0.41925744351509303	1.1915144929127115	0.5689344446947511
SIRPA	140885	0.42023	0.03568681318681318	0.37651294676732183	1.4474922325760282	0.5688781257039874
NKX6-3	157848	0.21261	0.1415934065934066	0.6724163125188211	0.84895696943417	0.5686528497409327
MAP2K3	5606	0.42803	0.030576923076923068	0.3685257908516401	1.514606219314348	0.5685965307501689
OXTR	5021	0.20106	0.14596153846153848	0.6966743217810849	0.8357615677393188	0.5684275737778779
HSP90B1	7184	0.40646	0.045480769230769234	0.39098218717700356	1.3421721985609687	0.5682586168055869
BRPF3	27154	0.2703	0.11862637362637365	0.5681539543012746	0.9258187456508439	0.5678643838702411
PCDHB11	56125	0.021813	0.20006868131868139	1.6612846006364723	0.6988208903493509	0.5678080648794773
BRICD5	283870	0.075653	0.18483516483516482	1.1211738454648181	0.7332154008592002	0.5678080648794773
STXBP1	6812	0.43935	0.02223901098901099	0.3571893692627201	1.6528845305596633	0.5677517458887137
HYLS1	219844	0.14902	0.16473901098901098	0.8267554409384332	0.7832035456323176	0.5677517458887137
NAPA	8775	0.42144	0.03549450549450551	0.3752642467183102	1.4498388699899905	0.5677517458887137
RXRG	6258	0.051447	0.1918818681318681	1.2886399449332708	0.7169660619623822	0.5676954268979499
GLB1L3	112937	0.027661	0.1979120879120879	1.5581321233361982	0.7035276795015604	0.5674701509348953
TAS1R2	80834	0.23503	0.13309065934065933	0.6288766994180504	0.8758524234070459	0.5674138319441315
FBXO21	23014	0.019427	0.20075549450549451	1.711594259824249	0.697332559619582	0.5674138319441315
SYCP2	10388	0.41538	0.03994505494505495	0.3815544180049201	1.398536977126037	0.5673575129533679
CDS1	1040	0.38394	0.06299450549450548	0.4157366394472652	1.2006973289191172	0.5672448749718405
CAMK2N2	94032	0.32361	0.0954532967032967	0.4899780665476614	1.0202090676335862	0.5671322369903131
RNF185	91445	0.24069	0.13104395604395605	0.6185419530778425	0.882583004608942	0.5669632800180221
DHRS2	10202	0.015805	0.20174450549450548	1.8012054998244016	0.6951982844418834	0.5669069610272583
SLC23A2	9962	0.3855	0.06225274725274727	0.4139756176130242	1.2058414781216775	0.5669069610272583
CNR2	1269	0.075488	0.1853846153846154	1.1221220807944985	0.7319263097319684	0.5667943230457311
TINF2	26277	0.41777	0.03931318681318681	0.3790627498565365	1.4054617498892796	0.5667943230457311
GNG3	2785	0.29426	0.111195054945055	0.5312687693646505	0.9539145262236445	0.5667380040549673
KLC1	3831	0.37394	0.07006868131868133	0.42719807630038914	1.1544760557818503	0.5667380040549673
KPNA3	3839	0.13597	0.16898351648351645	0.866556902450902	0.7721556566253083	0.5666816850642037
TAF15	8148	0.30115	0.10675824175824175	0.5212171324934007	0.9715985873852923	0.5666253660734399
ZNF668	79759	0.40983	0.04450549450549451	0.38739625394462596	1.351586369106425	0.5663437711196215
BANF1	8815	0.31513	0.09978021978021977	0.5015102505414155	1.0009555438000086	0.5661748141473305
DNAJA4	55466	0.065113	0.18913461538461537	1.186332294617304	0.7232289793794436	0.5660621761658031
AGRN	375790	0.46227	0.004052197802197804	0.33510429011635257	2.3923093633348738	0.5660058571750394
ADGRG3	222487	0.2196	0.14050824175824178	0.6583676642219457	0.8522982007044743	0.5659495381842757
TTC28	23331	0.20922	0.14473901098901096	0.6793968022403799	0.8394143992620072	0.5659495381842757
PTK2B	2185	0.46128	0.005384615384615386	0.3360353749558674	2.26884531229258	0.5656116242396936
ALX3	257	0.049558	0.1934478021978022	1.3048862286577636	0.7134362000279723	0.5654426672674026
APOBEC3G	60489	0.33859	0.08888736263736266	0.4703258725972879	1.0511599794908295	0.5652173913043478
TLN2	83660	0.23523	0.13498626373626374	0.6285072914240999	0.869710423261013	0.5651610723135841
PSMB2	5690	0.10697	0.1773076923076923	0.9707380041958248	0.7512724225811698	0.5648794773597657
IKBKE	9641	0.092934	0.18126373626373626	1.0318253698494713	0.7416890724397309	0.5644852444244199
WSCD1	23302	0.39993	0.055604395604395604	0.3980160168572809	1.2548908754812944	0.5642036494706015
[truncated: 15,757 more rows]
